# Supplementary material
Source: publisher figshare collection journal article supplement (https://gsajournals.figshare.com/ndownloader/files/22441130)
Supplement: Supplementary file 1 [file 22441130]

## Sheet: Log2FC >4, padjust<0.001
Gene	baseMean	log2FoldChange	lfcSE	stat	pvalue	padj	ManiBL_Mani_1.1	ManiBL_Mani_1.2	ManiBL_Mani_1.3	ManiBL_Mani_3.2	ManiH_Mani_H1	ManiH_Mani_H3	ManiH_Mani_H4	ManiH_Mani_H5	Protein product	Length	Protein name	Gene names	Entry	Entry name	Status	Protein names	Organism	Length2	Gene ontology IDs	Gene ontology (GO)	Cross-reference (Pfam)	Signal peptide	Annotation	Cross-reference (KEGG)	EnsemblFungi transcript	KEGG_ENZYME
MAN_10529	8.75353	6.52919	1.21603	5.36928	7.90498e-08	1.59842e-07	25.2777	7.51566	16.3692	20.8656	0	0	0	0	KID59588.1	234	hypothetical protein MAN_10529, partial	MAN_10529	A0A0B4EMY2	A0A0B4EMY2_METAN	unreviewed	Uncharacterized protein (Fragment)	Metarhizium anisopliae ARSEF 549	234	GO:0003700	transcription factor activity, sequence-specific DNA binding [GO:0003700]	NULL	NULL	1 out of 5	NULL	KID59588;	NULL
MAN_09393	5004.42	6.50184	0.14052	46.2698	0	0	9637.56	9626.63	10689.1	9645.11	154.518	103.112	82.4156	96.9136	KID61109.1	410	C6 finger transcription factor, partial	MAN_09393	A0A0B4FXW8	A0A0B4FXW8_METAN	unreviewed	C6 finger transcription factor (Fragment)	Metarhizium anisopliae ARSEF 549	410	NULL	NULL	NULL	NULL	1 out of 5	NULL	KID61109;	NULL
MAN_07818	654.704	5.69527	0.195685	29.1043	3.16644e-186	1.05029e-184	1300.96	1225.99	1274.28	1337.14	13.3029	22.5557	20.1014	43.3018	KID62602.1	282	bZIP transcription factor, partial	MAN_07818	A0A0B4F4B4	A0A0B4F4B4_METAN	unreviewed	BZIP transcription factor (Fragment)	Metarhizium anisopliae ARSEF 549	282	NULL	NULL	NULL	NULL	1 out of 5	NULL	KID62602;	NULL
MAN_06070	112.649	5.41104	0.367944	14.7062	5.88536e-49	3.95582e-48	224.972	198.226	235.465	221.697	6.13978	6.44449	0	8.24797	KID65059.1	133	pyridoxamine phosphate oxidase family protein, partial	MAN_06070	A0A0B4G9P1	A0A0B4G9P1_METAN	unreviewed	Pyridoxamine phosphate oxidase family protein (Fragment)	Metarhizium anisopliae ARSEF 549	133	GO:0048037	cofactor binding [GO:0048037]	NULL	NULL	1 out of 5	NULL	KID65059;	NULL
MAN_07891	74.2028	5.11751	0.452973	11.2976	1.34831e-29	5.89518e-29	141.555	106.159	192.653	136.496	5.11649	7.51858	0	4.12398	KID62675.1	606	Transcription factor, fungi, partial	MAN_07891	A0A0B4EKR3	A0A0B4EKR3_METAN	unreviewed	Transcription factor, fungi (Fragment)	Metarhizium anisopliae ARSEF 549	606	GO:0003677; GO:0005634; GO:0006351; GO:0008270	nucleus [GO:0005634]; DNA binding [GO:0003677]; zinc ion binding [GO:0008270]; transcription, DNA-templated [GO:0006351]	PF04082;	NULL	1 out of 5	NULL	KID62675;	NULL
MAN_02593	6479.71	5.00528	0.0844001	59.3042	0	0	12111.4	12022.2	13387.5	12750.6	357.131	421.04	358.81	428.894	KID70079.1	357	C6 transcription factor, partial	MAN_02593	A0A0B4GPJ9	A0A0B4GPJ9_METAN	unreviewed	C6 transcription factor (Fragment)	Metarhizium anisopliae ARSEF 549	357	GO:0000981; GO:0005634; GO:0008270	nucleus [GO:0005634]; RNA polymerase II transcription factor activity, sequence-specific DNA binding [GO:0000981]; zinc ion binding [GO:0008270]	PF00172;	NULL	1 out of 5	NULL	KID70079;	NULL
MAN_08598	1418.16	4.75679	0.111257	42.755	0	0	2718.2	3001.57	2705.96	2515.17	109.493	91.297	100.507	103.1	KID61919.1	892	Nitrate reductase, partial	MAN_08598	A0A0B4G0C4	A0A0B4G0C4_METAN	unreviewed	Nitrate reductase (Fragment)	Metarhizium anisopliae ARSEF 549	892	GO:0006809; GO:0020037; GO:0030151; GO:0042128; GO:0043546; GO:0050464	heme binding [GO:0020037]; molybdenum ion binding [GO:0030151]; molybdopterin cofactor binding [GO:0043546]; nitrate reductase (NADPH) activity [GO:0050464]; nitrate assimilation [GO:0042128]; nitric oxide biosynthetic process [GO:0006809]	PF00173;PF00970;PF03404;PF00175;PF00174;	NULL	2 out of 5	NULL	KID61919;	K10534
MAN_06203	1882.27	4.53435	0.0850874	53.2905	0	0	3550.68	3566.18	3610.05	3707.99	161.681	162.186	143.725	155.68	KID65192.1	773	Transcription factor, fungi, partial	MAN_06203	A0A0B4FBV5	A0A0B4FBV5_METAN	unreviewed	Transcription factor, fungi (Fragment)	Metarhizium anisopliae ARSEF 549	773	GO:0000981; GO:0003677; GO:0005634; GO:0006351; GO:0008270	nucleus [GO:0005634]; DNA binding [GO:0003677]; RNA polymerase II transcription factor activity, sequence-specific DNA binding [GO:0000981]; zinc ion binding [GO:0008270]; transcription, DNA-templated [GO:0006351]	PF04082;PF00172;	NULL	1 out of 5	NULL	KID65192;	NULL
MAN_06573	278.319	4.39342	0.197142	22.2856	5.10001e-110	8.01441e-109	522.407	499.792	554.036	549.46	37.862	16.1112	21.1064	25.7749	KID64399.1	412	C6 finger domain-containing protein, partial	MAN_06573	A0A0B4G7N0	A0A0B4G7N0_METAN	unreviewed	C6 finger domain-containing protein (Fragment)	Metarhizium anisopliae ARSEF 549	412	GO:0000981; GO:0005634; GO:0008270	nucleus [GO:0005634]; RNA polymerase II transcription factor activity, sequence-specific DNA binding [GO:0000981]; zinc ion binding [GO:0008270]	PF11951;	NULL	1 out of 5	NULL	KID64399;	NULL
MAN_10531	8.03022	4.30952	1.10909	3.88564	0.000102061	0.00016899	10.1111	23.4864	7.55504	19.9962	0	0	0	3.09299	KID59590.1	202	Transcription factor, MADS-box, partial	MAN_10531	A0A0B4EBN3	A0A0B4EBN3_METAN	unreviewed	Transcription factor, MADS-box (Fragment)	Metarhizium anisopliae ARSEF 549	202	GO:0003677; GO:0005634; GO:0006351; GO:0006355; GO:0046983	nucleus [GO:0005634]; DNA binding [GO:0003677]; protein dimerization activity [GO:0046983]; regulation of transcription, DNA-templated [GO:0006355]; transcription, DNA-templated [GO:0006351]	PF00319;	NULL	1 out of 5	NULL	KID59590;	K09265
MAN_09977	4085.15	4.26742	0.120746	35.3422	1.32163e-273	8.9127e-272	7660.84	7965.66	7663.33	7778.51	344.851	408.151	519.621	340.229	KID60444.1	886	transcription factor AbaA, partial	MAN_09977	A0A0B4FW38	A0A0B4FW38_METAN	unreviewed	Transcription factor AbaA (Fragment)	Metarhizium anisopliae ARSEF 549	886	GO:0003700	transcription factor activity, sequence-specific DNA binding [GO:0003700]	PF01285;	NULL	1 out of 5	NULL	KID60444;	K09448
MAN_10477	1468.33	13.9153	1.02372	13.5929	4.41419e-42	2.57739e-41	2947.38	2987.48	3122.75	2689.05	0	0	0	0	KID59671.1	612	laccase, partial	MAN_10477	A0A0B4F1I0	A0A0B4F1I0_METAN	unreviewed	Laccase (Fragment)	Metarhizium anisopliae ARSEF 549	612	GO:0005507; GO:0016491	copper ion binding [GO:0005507]; oxidoreductase activity [GO:0016491]	PF00394;PF07731;PF07732;	SIGNAL 1 20 {ECO:0000256|SAM:SignalP}.	1 out of 5	NULL	KID59671;	NULL
MAN_06146	780.709	13.0042	1.02381	12.7018	5.77912e-37	3.02565e-36	1638	1504.07	1600.41	1503.19	0	0	0	0	KID65135.1	493	oxidoreductase, FAD-binding protein, partial	MAN_06146	A0A0B4ET92	A0A0B4ET92_METAN	unreviewed	Oxidoreductase, FAD-binding protein (Fragment)	Metarhizium anisopliae ARSEF 549	493	GO:0016614; GO:0050660	flavin adenine dinucleotide binding [GO:0050660]; oxidoreductase activity, acting on CH-OH group of donors [GO:0016614]	PF01565;	NULL	1 out of 5	NULL	KID65135;	NULL
MAN_09808	740.633	12.929	1.02383	12.6281	1.47733e-36	7.65189e-36	1504.03	1461.8	1406.5	1552.75	0	0	0	0	KID60673.1	509	chitooligosaccharide oxidase, partial	MAN_09808	A0A0B4ER58	A0A0B4ER58_METAN	unreviewed	Chitooligosaccharide oxidase (Fragment)	Metarhizium anisopliae ARSEF 549	509	GO:0016614; GO:0050660	flavin adenine dinucleotide binding [GO:0050660]; oxidoreductase activity, acting on CH-OH group of donors [GO:0016614]	PF08031;PF01565;	SIGNAL 1 21 {ECO:0000256|SAM:SignalP}.	1 out of 5	NULL	KID60673;	NULL
MAN_04590	587.919	12.5944	1.02422	12.2966	9.44607e-35	4.67392e-34	1135.81	1187.47	1240.29	1139.78	0	0	0	0	KID66309.1	430	P450 monooxygenase, partial	MAN_04590	A0A0B4GDG5	A0A0B4GDG5_METAN	unreviewed	p450 monooxygenase (Fragment)	Metarhizium anisopliae ARSEF 549	430	GO:0004497; GO:0009820; GO:0016765	monooxygenase activity [GO:0004497]; transferase activity, transferring alkyl or aryl (other than methyl) groups [GO:0016765]; alkaloid metabolic process [GO:0009820]	PF11991;	NULL	1 out of 5	NULL	KID66309;	NULL
MAN_09382	5350.59	12.0273	1.41836	8.47972	2.25733e-17	6.87804e-17	10071.5	10746.5	11225.5	10751	10.233	0	0	0	KID61098.1	252	hypothetical protein MAN_09382, partial	MAN_09382	A0A0B4ESK5	A0A0B4ESK5_METAN	unreviewed	Uncharacterized protein (Fragment)	Metarhizium anisopliae ARSEF 549	252	NULL	NULL	NULL	NULL	1 out of 5	NULL	KID61098;	K22123
MAN_10264	336.37	11.7888	1.02579	11.4924	1.44041e-30	6.44735e-30	676.601	643.529	712.692	658.135	0	0	0	0	KID60014.1	176	small secreted protein, partial	MAN_10264	A0A0B4FUV8	A0A0B4FUV8_METAN	unreviewed	Small secreted protein (Fragment)	Metarhizium anisopliae ARSEF 549	176	NULL	NULL	NULL	SIGNAL 1 17 {ECO:0000256|SAM:SignalP}.	1 out of 5	NULL	KID60014;	NULL
MAN_09389	82765.2	11.4526	0.489638	23.39	5.4045e-121	9.70617e-120	161051	160816	177861	162157	38.8853	119.223	43.218	35.0539	KID61105.1	273	methyltransferase SirN-like protein, partial	MAN_09389	A0A0B4EG45	A0A0B4EG45_METAN	unreviewed	Methyltransferase SirN-like protein (Fragment)	Metarhizium anisopliae ARSEF 549	273	GO:0008168	methyltransferase activity [GO:0008168]	NULL	NULL	1 out of 5	NULL	KID61105;	NULL
MAN_07950	74542.3	11.4508	0.443055	25.8451	2.75879e-147	6.39927e-146	147952	134685	159695	153793	42.9785	102.038	34.1723	34.0229	KID62734.1	256	hypothetical protein MAN_07950, partial	MAN_07950	A0A0B4G2R2	A0A0B4G2R2_METAN	unreviewed	Uncharacterized protein (Fragment)	Metarhizium anisopliae ARSEF 549	256	NULL	NULL	NULL	SIGNAL 1 18 {ECO:0000256|SAM:SignalP}.	1 out of 5	NULL	KID62734;	NULL
MAN_04589	252.311	11.3759	1.02726	11.074	1.67698e-28	7.1242e-28	501.342	501.671	474.708	540.766	0	0	0	0	KID66308.1	496	P450 monooxygenase, partial	MAN_04589	A0A0B4F712	A0A0B4F712_METAN	unreviewed	p450 monooxygenase (Fragment)	Metarhizium anisopliae ARSEF 549	496	GO:0004497; GO:0005506; GO:0016705; GO:0020037	heme binding [GO:0020037]; iron ion binding [GO:0005506]; monooxygenase activity [GO:0004497]; oxidoreductase activity, acting on paired donors, with incorporation or reduction of molecular oxygen [GO:0016705]	PF00067;	SIGNAL 1 21 {ECO:0000256|SAM:SignalP}.	1 out of 5	NULL	KID66308;	NULL
MAN_09390	64111.9	11.2933	0.360091	31.3624	6.5878e-216	2.83053e-214	120505	127071	139028	126087	32.7455	80.5562	64.3244	26.8059	KID61106.1	3997	Beta-ketoacyl synthase, partial	MAN_09390	A0A0B4F5H5	A0A0B4F5H5_METAN	unreviewed	Beta-ketoacyl synthase (Fragment)	Metarhizium anisopliae ARSEF 549	3997	GO:0003824; GO:0008152; GO:0031177	catalytic activity [GO:0003824]; phosphopantetheine binding [GO:0031177]; metabolic process [GO:0008152]	PF00698;PF00501;PF00668;PF16197;PF00109;PF02801;PF08659;PF07993;PF00550;PF14765;	NULL	1 out of 5	NULL	KID61106;	K15390
MAN_06029	234.042	11.265	1.02849	10.9529	6.43413e-28	2.69403e-27	482.805	440.606	512.483	436.438	0	0	0	0	KID65018.1	420	protein phosphatase regulatory subunit Gac1, partial	MAN_06029	A0A0B4F3G4	A0A0B4F3G4_METAN	unreviewed	Protein phosphatase regulatory subunit Gac1 (Fragment)	Metarhizium anisopliae ARSEF 549	420	NULL	NULL	PF03370;	NULL	1 out of 5	NULL	KID65018;	NULL
MAN_09388	7444.28	11.2564	1.1426	9.85158	6.74761e-23	2.42452e-22	14859.9	14432.9	15965.1	14272	8.18638	0	16.0811	0	KID61104.1	479	Cytochrome P450, partial	MAN_09388	A0A0B4FXW4	A0A0B4FXW4_METAN	unreviewed	Cytochrome P450 (Fragment)	Metarhizium anisopliae ARSEF 549	479	GO:0004497; GO:0005506; GO:0016705; GO:0020037	heme binding [GO:0020037]; iron ion binding [GO:0005506]; monooxygenase activity [GO:0004497]; oxidoreductase activity, acting on paired donors, with incorporation or reduction of molecular oxygen [GO:0016705]	PF00067;	NULL	1 out of 5	NULL	KID61104;	NULL
MAN_05612	1857.33	11.2266	0.594031	18.8991	1.16081e-79	1.24557e-78	3740.26	3472.24	3897.14	3742.76	0	3.22225	3.01521	0	KID65953.1	425	Nucleotide sugar dehydrogenase, partial	MAN_05612	A0A0B4F651	A0A0B4F651_METAN	unreviewed	Nucleotide sugar dehydrogenase (Fragment)	Metarhizium anisopliae ARSEF 549	425	GO:0000271; GO:0016616; GO:0016628; GO:0051287	NAD binding [GO:0051287]; oxidoreductase activity, acting on the CH-CH group of donors, NAD or NADP as acceptor [GO:0016628]; oxidoreductase activity, acting on the CH-OH group of donors, NAD or NADP as acceptor [GO:0016616]; polysaccharide biosynthetic process [GO:0000271]	PF00984;PF03721;	NULL	1 out of 5	NULL	KID65953;	NULL
MAN_06392	9429.29	11.1558	0.261652	42.6361	0	0	18639.8	19349.1	18678.6	18733.8	9.20968	8.59266	8.04055	7.21697	KID64218.1	385	hypothetical protein MAN_06392, partial	MAN_06392	A0A0B4F1A2	A0A0B4F1A2_METAN	unreviewed	Uncharacterized protein (Fragment)	Metarhizium anisopliae ARSEF 549	385	NULL	NULL	NULL	NULL	1 out of 5	NULL	KID64218;	NULL
MAN_09398	11634	11.1004	0.241797	45.9081	0	0	21526.5	22431.4	25952.8	23118.2	9.20968	18.2594	9.04562	6.18598	KID61114.1	276	UbiA prenyltransferase family, partial	MAN_09398	A0A0B4FXX1	A0A0B4FXX1_METAN	unreviewed	UbiA prenyltransferase family (Fragment)	Metarhizium anisopliae ARSEF 549	276	GO:0016021; GO:0016765	integral component of membrane [GO:0016021]; transferase activity, transferring alkyl or aryl (other than methyl) groups [GO:0016765]	PF01040;	NULL	1 out of 5	NULL	KID61114;	NULL
MAN_09391	20394.5	11.0782	0.183646	60.3238	0	0	39587.5	39544.6	43665.6	40282.7	14.3262	29.0002	20.1014	12.372	KID61107.1	452	alpha/beta hydrolase, partial	MAN_09391	A0A0B4EZR8	A0A0B4EZR8_METAN	unreviewed	Alpha/beta hydrolase (Fragment)	Metarhizium anisopliae ARSEF 549	452	GO:0016787	hydrolase activity [GO:0016787]	PF12697;	NULL	1 out of 5	NULL	KID61107;	NULL
MAN_01655	196.467	11.0136	1.02901	10.7031	9.84172e-27	3.98324e-26	415.397	358.873	407.972	389.491	0	0	0	0	KID69141.1	515	Cytochrome P450, partial	MAN_01655	A0A0B4FTX6	A0A0B4FTX6_METAN	unreviewed	Cytochrome P450 (Fragment)	Metarhizium anisopliae ARSEF 549	515	GO:0004497; GO:0005506; GO:0016705; GO:0020037	heme binding [GO:0020037]; iron ion binding [GO:0005506]; monooxygenase activity [GO:0004497]; oxidoreductase activity, acting on paired donors, with incorporation or reduction of molecular oxygen [GO:0016705]	PF00067;	NULL	1 out of 5	NULL	KID69141;	NULL
MAN_09757	184.388	10.923	1.03047	10.6	2.98028e-26	1.18086e-25	414.555	336.326	365.16	359.062	0	0	0	0	KID60622.1	409	Major facilitator superfamily domain, general substrate transporter, partial	MAN_09757	A0A0B4EY82	A0A0B4EY82_METAN	unreviewed	Major facilitator superfamily domain, general substrate transporter (Fragment)	Metarhizium anisopliae ARSEF 549	409	GO:0016021; GO:0055085	integral component of membrane [GO:0016021]; transmembrane transport [GO:0055085]	PF07690;	NULL	1 out of 5	NULL	KID60622;	NULL
MAN_04588	183.627	10.9161	1.02975	10.6007	2.95729e-26	1.17221e-25	345.462	346.66	375.234	401.662	0	0	0	0	KID66307.1	540	P450 monooxygenase, partial	MAN_04588	A0A0B4FEK8	A0A0B4FEK8_METAN	unreviewed	p450 monooxygenase (Fragment)	Metarhizium anisopliae ARSEF 549	540	GO:0004497; GO:0005506; GO:0016021; GO:0016705; GO:0020037	integral component of membrane [GO:0016021]; heme binding [GO:0020037]; iron ion binding [GO:0005506]; monooxygenase activity [GO:0004497]; oxidoreductase activity, acting on paired donors, with incorporation or reduction of molecular oxygen [GO:0016705]	PF00067;	NULL	1 out of 5	NULL	KID66307;	NULL
MAN_06393	13176.7	10.8817	0.218363	49.8332	0	0	28394.5	28096.4	24145.9	24720.5	10.233	26.8521	8.04055	11.341	KID64219.1	626	WSC domain containing protein, partial	MAN_06393	A0A0B4G747	A0A0B4G747_METAN	unreviewed	WSC domain containing protein (Fragment)	Metarhizium anisopliae ARSEF 549	626	NULL	NULL	PF01822;	NULL	1 out of 5	NULL	KID64219;	NULL
MAN_09384	55845.2	10.8184	0.388106	27.8747	5.40027e-171	1.55342e-169	111404	111194	114857	109059	34.7921	89.1488	92.4663	30.9299	KID61100.1	909	steroid monooxygenase, partial	MAN_09384	A0A0B4EG42	A0A0B4EG42_METAN	unreviewed	Steroid monooxygenase (Fragment)	Metarhizium anisopliae ARSEF 549	909	GO:0004499; GO:0050660; GO:0050661	flavin adenine dinucleotide binding [GO:0050660]; N,N-dimethylaniline monooxygenase activity [GO:0004499]; NADP binding [GO:0050661]	PF00743;PF08242;	NULL	1 out of 5	NULL	KID61100;	NULL
MAN_09397	37977.9	10.776	0.321604	33.5072	3.78332e-246	2.06019e-244	74608.9	75694	81114.7	72232.3	30.6989	67.6672	50.2534	24.7439	KID61113.1	535	cytochrome P450 oxidoreductase OrdA-like protein, partial	MAN_09397	A0A0B4ESL7	A0A0B4ESL7_METAN	unreviewed	Cytochrome P450 oxidoreductase OrdA-like protein (Fragment)	Metarhizium anisopliae ARSEF 549	535	GO:0004497; GO:0005506; GO:0016705; GO:0020037	heme binding [GO:0020037]; iron ion binding [GO:0005506]; monooxygenase activity [GO:0004497]; oxidoreductase activity, acting on paired donors, with incorporation or reduction of molecular oxygen [GO:0016705]	PF00067;	NULL	1 out of 5	NULL	KID61113;	K21295
MAN_09385	11848.7	10.7574	0.213093	50.4823	0	0	22640.4	22373.2	25664.5	24057.1	17.3961	12.889	17.0862	7.21697	KID61101.1	726	acetate-CoA ligase, partial	MAN_09385	A0A0B4F5H2	A0A0B4F5H2_METAN	unreviewed	Acetate-CoA ligase (Fragment)	Metarhizium anisopliae ARSEF 549	726	GO:0008152; GO:0016874	ligase activity [GO:0016874]; metabolic process [GO:0008152]	PF16177;PF00501;PF13193;	NULL	1 out of 5	NULL	KID61101;	K01908
MAN_09395	11120.1	10.7493	0.215008	49.9951	0	0	21824.8	22457.7	23321.1	21305.5	9.20968	19.3335	16.0811	7.21697	KID61111.1	267	phytanoyl-CoA dioxygenase family protein, partial	MAN_09395	A0A0B4F5I0	A0A0B4F5I0_METAN	unreviewed	Phytanoyl-CoA dioxygenase family protein (Fragment)	Metarhizium anisopliae ARSEF 549	267	GO:0051213	dioxygenase activity [GO:0051213]	PF05721;	NULL	1 out of 5	NULL	KID61111;	NULL
MAN_10475	4215.98	10.7465	0.337239	31.866	7.90524e-223	3.54622e-221	8543.03	8253.14	8658.07	8254.07	0	3.22225	8.04055	8.24797	KID59669.1	2148	conidial pigment polyketide synthase PksP/Alb1, partial	MAN_10475	A0A0B4FTU6	A0A0B4FTU6_METAN	unreviewed	Conidial pigment polyketide synthase PksP/Alb1 (Fragment)	Metarhizium anisopliae ARSEF 549	2148	GO:0009058; GO:0016788; GO:0031177	hydrolase activity, acting on ester bonds [GO:0016788]; phosphopantetheine binding [GO:0031177]; biosynthetic process [GO:0009058]	PF00698;PF00109;PF02801;PF00550;PF14765;PF16073;PF00975;	NULL	1 out of 5	NULL	KID59669;	NULL
MAN_06149	159.613	10.7121	1.03563	10.3435	4.47781e-25	1.7129e-24	327.768	260.23	380.27	308.637	0	0	0	0	KID65138.1	380	Alcohol dehydrogenase superfamily, zinc-type, partial	MAN_06149	A0A0B4F3T6	A0A0B4F3T6_METAN	unreviewed	Alcohol dehydrogenase superfamily, zinc-type (Fragment)	Metarhizium anisopliae ARSEF 549	380	GO:0008270; GO:0016021; GO:0016491	integral component of membrane [GO:0016021]; oxidoreductase activity [GO:0016491]; zinc ion binding [GO:0008270]	PF08240;PF00107;	NULL	1 out of 5	NULL	KID65138;	NULL
MAN_09380	35349.4	10.6123	0.352814	30.0789	9.13487e-199	3.33406e-197	68878.5	68884.8	76487.2	68364.3	32.7455	73.0376	52.2636	22.6819	KID61096.1	397	O-methyltransferase, family 2, partial	MAN_09380	A0A0B4F5G8	A0A0B4F5G8_METAN	unreviewed	O-methyltransferase, family 2 (Fragment)	Metarhizium anisopliae ARSEF 549	397	GO:0008171	O-methyltransferase activity [GO:0008171]	PF00891;	NULL	1 out of 5	NULL	KID61096;	NULL
MAN_04171	147.548	10.6016	1.03137	10.2792	8.74583e-25	3.3169e-24	274.685	310.961	278.277	316.461	0	0	0	0	KID67413.1	394	porphyromonas-type peptidyl-arginine deiminase superfamily, partial	MAN_04171	A0A0B4FA13	A0A0B4FA13_METAN	unreviewed	Porphyromonas-type peptidyl-arginine deiminase superfamily (Fragment)	Metarhizium anisopliae ARSEF 549	394	GO:0004668; GO:0009446	protein-arginine deiminase activity [GO:0004668]; putrescine biosynthetic process [GO:0009446]	PF04371;	NULL	1 out of 5	NULL	KID67413;	NULL
MAN_09381	19100.7	10.5885	0.158223	66.9217	0	0	37558.5	38177.7	39104.9	37864.9	25.5824	32.2225	22.1115	19.5889	KID61097.1	247	Glutathione S-transferase protein, partial	MAN_09381	A0A0B4EZR0	A0A0B4EZR0_METAN	unreviewed	Glutathione S-transferase protein (Fragment)	Metarhizium anisopliae ARSEF 549	247	GO:0016740	transferase activity [GO:0016740]	PF00043;PF02798;	NULL	1 out of 5	NULL	KID61097;	K03233
MAN_09383	6932.98	10.5061	0.521219	20.1569	2.34185e-90	2.92243e-89	14059.5	14258.2	14173.3	12934.9	10.233	10.7408	17.0862	0	KID61099.1	175	hypothetical protein MAN_09383, partial	MAN_09383	A0A0B4FXW2	A0A0B4FXW2_METAN	unreviewed	Uncharacterized protein (Fragment)	Metarhizium anisopliae ARSEF 549	175	GO:0016021	integral component of membrane [GO:0016021]	NULL	NULL	1 out of 5	NULL	KID61099;	NULL
MAN_06331	109.003	10.1634	1.03381	9.831	8.27907e-23	2.96538e-22	230.87	201.983	227.91	211.264	0	0	0	0	KID65320.1	538	cyclohexanone monooxygenase, partial	MAN_06331	A0A0B4ETR5	A0A0B4ETR5_METAN	unreviewed	Cyclohexanone monooxygenase (Fragment)	Metarhizium anisopliae ARSEF 549	538	GO:0004499; GO:0050660; GO:0050661	flavin adenine dinucleotide binding [GO:0050660]; N,N-dimethylaniline monooxygenase activity [GO:0004499]; NADP binding [GO:0050661]	PF00743;	NULL	1 out of 5	NULL	KID65320;	K03379
MAN_05613	2308.53	10.1239	0.370168	27.3495	1.09469e-164	2.949e-163	4683.12	4378.81	4985.07	4404.37	0	10.7408	3.01521	3.09299	KID65954.1	657	glycosyl transferase, group 2 family protein, partial	MAN_05613	A0A0B4GCB8	A0A0B4GCB8_METAN	unreviewed	Glycosyl transferase, group 2 family protein (Fragment)	Metarhizium anisopliae ARSEF 549	657	GO:0016021; GO:0016740	integral component of membrane [GO:0016021]; transferase activity [GO:0016740]	NULL	NULL	1 out of 5	NULL	KID65954;	NULL
MAN_09730	287.055	10.1151	1.03089	9.81202	9.99451e-23	3.56852e-22	446.573	516.702	707.655	623.359	0	2.14816	0	0	KID60595.1	102	hypothetical protein MAN_09730, partial	MAN_09730	A0A0B4EEM5	A0A0B4EEM5_METAN	unreviewed	Uncharacterized protein (Fragment)	Metarhizium anisopliae ARSEF 549	102	NULL	NULL	NULL	SIGNAL 1 18 {ECO:0000256|SAM:SignalP}.	1 out of 5	NULL	KID60595;	NULL
MAN_09392	36196.7	10.0095	0.324162	30.8781	2.35067e-209	9.57475e-208	68613	67787.5	79710.7	73181.6	35.8154	105.26	53.2686	86.6037	KID61108.1	160	Dimeric alpha-beta barrel, partial	MAN_09392	A0A0B4ESL4	A0A0B4ESL4_METAN	unreviewed	Dimeric alpha-beta barrel (Fragment)	Metarhizium anisopliae ARSEF 549	160	NULL	NULL	PF07110;	NULL	1 out of 5	NULL	KID61108;	NULL
MAN_00019	84.4469	9.79363	1.03754	9.43927	3.75402e-21	1.28798e-20	169.361	156.889	187.617	161.708	0	0	0	0	KID70420.1	198	Outer membrane protein, beta-barrel, partial	MAN_00019	A0A0B4F8I0	A0A0B4F8I0_METAN	unreviewed	Outer membrane protein, beta-barrel (Fragment)	Metarhizium anisopliae ARSEF 549	198	GO:0016021	integral component of membrane [GO:0016021]	NULL	SIGNAL 1 25 {ECO:0000256|SAM:SignalP}.	1 out of 5	NULL	KID70420;	NULL
MAN_01650	79.6756	9.70955	1.03948	9.34078	9.56235e-21	3.24362e-20	138.185	167.224	173.766	158.231	0	0	0	0	KID69136.1	426	alpha/beta hydrolase, partial	MAN_01650	A0A0B4FTX0	A0A0B4FTX0_METAN	unreviewed	Alpha/beta hydrolase (Fragment)	Metarhizium anisopliae ARSEF 549	426	GO:0016787	hydrolase activity [GO:0016787]	PF12697;	NULL	1 out of 5	NULL	KID69136;	NULL
MAN_07788	415.182	9.65018	0.728655	13.2438	4.89912e-40	2.73808e-39	827.425	796.66	810.907	882.44	0	0	4.02027	0	KID62572.1	125	hypothetical protein MAN_07788, partial	MAN_07788	A0A0B4F492	A0A0B4F492_METAN	unreviewed	Uncharacterized protein (Fragment)	Metarhizium anisopliae ARSEF 549	125	NULL	NULL	NULL	SIGNAL 1 19 {ECO:0000256|SAM:SignalP}.	1 out of 5	NULL	KID62572;	NULL
MAN_01644	71.7091	9.56094	1.03982	9.1948	3.75708e-20	1.24986e-19	134.815	149.374	134.732	154.753	0	0	0	0	KID69130.1	267	NAD(P)-binding domain protein, partial	MAN_01644	A0A0B4F4W3	A0A0B4F4W3_METAN	unreviewed	NAD(P)-binding domain protein (Fragment)	Metarhizium anisopliae ARSEF 549	267	NULL	NULL	PF00106;	NULL	1 out of 5	NULL	KID69130;	NULL
MAN_04596	177.269	9.42036	1.02639	9.17815	4.3855e-20	1.45512e-19	315.972	337.265	366.419	396.446	2.04659	0	0	0	KID66315.1	422	FAD dependent monooxygenase, partial	MAN_04596	A0A0B4EWJ8	A0A0B4EWJ8_METAN	unreviewed	FAD dependent monooxygenase (Fragment)	Metarhizium anisopliae ARSEF 549	422	GO:0004497; GO:0071949	FAD binding [GO:0071949]; monooxygenase activity [GO:0004497]	PF01494;	NULL	1 out of 5	NULL	KID66315;	K18386
MAN_06006	1266.57	9.35057	0.383596	24.3761	3.0682e-131	6.00837e-130	2413.18	2347.71	2746.26	2609.94	5.11649	5.37041	5.02534	0	KID64995.1	260	NAD(P)-binding domain protein, partial	MAN_06006	A0A0B4ESR0	A0A0B4ESR0_METAN	unreviewed	NAD(P)-binding domain protein (Fragment)	Metarhizium anisopliae ARSEF 549	260	GO:0016491	oxidoreductase activity [GO:0016491]	NULL	NULL	1 out of 5	NULL	KID64995;	NULL
MAN_02861	21896.1	9.30889	0.107582	86.528	0	0	44088.6	44571.6	44737.2	41495.5	65.491	73.0376	75.3802	61.8598	KID68005.1	250	NAD(P)-binding domain protein, partial	MAN_02861	A0A0B4F1F0	A0A0B4F1F0_METAN	unreviewed	NAD(P)-binding domain protein (Fragment)	Metarhizium anisopliae ARSEF 549	250	NULL	NULL	NULL	NULL	1 out of 5	NULL	KID68005;	NULL
MAN_04592	406.22	9.29539	0.652661	14.2423	5.00543e-46	3.18167e-45	793.721	833.299	813.426	804.194	5.11649	0	0	0	KID66311.1	327	geranylgeranyl diphosphate synthase, partial	MAN_04592	A0A0B4FKF8	A0A0B4FKF8_METAN	unreviewed	Geranylgeranyl diphosphate synthase (Fragment)	Metarhizium anisopliae ARSEF 549	327	GO:0008299; GO:0016740	transferase activity [GO:0016740]; isoprenoid biosynthetic process [GO:0008299]	PF00348;	NULL	1 out of 5	NULL	KID66311;	K00804
MAN_02681	53.6937	9.13772	1.05274	8.6799	3.96107e-18	1.23388e-17	98.5832	91.1274	137.25	102.589	0	0	0	0	KID70167.1	158	Ribonuclease III, partial	MAN_02681	A0A0B4FQZ5	A0A0B4FQZ5_METAN	unreviewed	Ribonuclease III (Fragment)	Metarhizium anisopliae ARSEF 549	158	GO:0004525; GO:0006396	ribonuclease III activity [GO:0004525]; RNA processing [GO:0006396]	PF00636;	NULL	1 out of 5	NULL	KID70167;	NULL
MAN_10647	4762.99	8.90227	0.180599	49.2932	0	0	9235.64	9670.78	9758.59	9359.95	18.4194	15.0372	35.1774	10.31	KID59477.1	426	metalloprotease MEP1, partial	MAN_10647	A0A0B4EUR5	A0A0B4EUR5_METAN	unreviewed	Metalloprotease MEP1 (Fragment)	Metarhizium anisopliae ARSEF 549	426	GO:0008237	metallopeptidase activity [GO:0008237]	PF05572;	SIGNAL 1 20 {ECO:0000256|SAM:SignalP}.	1 out of 5	NULL	KID59477;	NULL
MAN_00992	16483.3	8.81625	0.148476	59.3784	0	0	34662.5	33060.5	32398.5	31452.2	92.0968	96.6674	53.2686	50.5188	KID71393.1	82	pantothenate transporter liz1, partial	MAN_00992	A0A0B4FLT1	A0A0B4FLT1_METAN	unreviewed	Pantothenate transporter liz1 (Fragment)	Metarhizium anisopliae ARSEF 549	82	NULL	NULL	NULL	NULL	1 out of 5	NULL	KID71393;	NULL
MAN_04597	42.6265	8.80823	1.05078	8.38257	5.17855e-17	1.55601e-16	80.8888	91.1274	88.1421	80.8541	0	0	0	0	KID66316.1	298	P450 monooxygenase, partial	MAN_04597	A0A0B4FKG3	A0A0B4FKG3_METAN	unreviewed	p450 monooxygenase (Fragment)	Metarhizium anisopliae ARSEF 549	298	GO:0004497; GO:0005506; GO:0016705; GO:0020037	heme binding [GO:0020037]; iron ion binding [GO:0005506]; monooxygenase activity [GO:0004497]; oxidoreductase activity, acting on paired donors, with incorporation or reduction of molecular oxygen [GO:0016705]	PF00067;	NULL	1 out of 5	NULL	KID66316;	NULL
MAN_04672	39.9426	8.71407	1.05983	8.22217	1.99856e-16	5.87681e-16	66.5647	70.4593	86.8829	95.6339	0	0	0	0	KID66391.1	596	oxidoreductase, short chain dehydrogenase/reductase family, partial	MAN_04672	A0A0B4FKM9	A0A0B4FKM9_METAN	unreviewed	Oxidoreductase, short chain dehydrogenase/reductase family (Fragment)	Metarhizium anisopliae ARSEF 549	596	NULL	NULL	PF09994;	NULL	1 out of 5	NULL	KID66391;	NULL
MAN_00979	680.788	8.66075	0.411687	21.0372	2.99355e-98	4.10274e-97	1319.5	1475.89	1276.8	1360.61	3.06989	3.22225	0	7.21697	KID71380.1	126	hypothetical protein MAN_00979, partial	MAN_00979	A0A0B4FBA0	A0A0B4FBA0_METAN	unreviewed	Uncharacterized protein (Fragment)	Metarhizium anisopliae ARSEF 549	126	NULL	NULL	NULL	SIGNAL 1 20 {ECO:0000256|SAM:SignalP}.	1 out of 5	NULL	KID71380;	NULL
MAN_00814	19932.7	8.63905	0.134694	64.1384	0	0	38657.2	37916.5	42965.5	39522.9	135.075	102.038	69.3497	92.7896	KID71215.1	457	UDP-glucuronosyl/UDP-glucosyltransferase, partial	MAN_00814	A0A0B4FAT6	A0A0B4FAT6_METAN	unreviewed	UDP-glucuronosyl/UDP-glucosyltransferase (Fragment)	Metarhizium anisopliae ARSEF 549	457	GO:0008152; GO:0016758	transferase activity, transferring hexosyl groups [GO:0016758]; metabolic process [GO:0008152]	PF00201;	NULL	1 out of 5	NULL	KID71215;	NULL
MAN_05742	37.7616	8.63151	1.05915	8.14946	3.65561e-16	1.06448e-15	64.0369	68.5804	86.8829	82.5929	0	0	0	0	KID66083.1	167	hypothetical protein MAN_05742, partial	MAN_05742	A0A0B4F6H6	A0A0B4F6H6_METAN	unreviewed	Uncharacterized protein (Fragment)	Metarhizium anisopliae ARSEF 549	167	GO:0016021	integral component of membrane [GO:0016021]	NULL	NULL	1 out of 5	NULL	KID66083;	NULL
MAN_07724	1577.86	8.44349	0.254579	33.1665	3.27173e-241	1.71732e-239	3115.06	3013.78	3254.96	3202.86	5.11649	10.7408	10.0507	10.31	KID63523.1	110	hypothetical protein MAN_07724, partial	MAN_07724	A0A0B4EZF4	A0A0B4EZF4_METAN	unreviewed	Uncharacterized protein (Fragment)	Metarhizium anisopliae ARSEF 549	110	NULL	NULL	NULL	SIGNAL 1 18 {ECO:0000256|SAM:SignalP}.	1 out of 5	NULL	KID63523;	NULL
MAN_04594	319.568	8.42394	1.21297	6.94489	3.78761e-12	9.36146e-12	602.453	602.193	649.733	694.65	0	7.51858	0	0	KID66313.1	341	prenyl transferase, partial	MAN_04594	A0A0B4F717	A0A0B4F717_METAN	unreviewed	Prenyl transferase (Fragment)	Metarhizium anisopliae ARSEF 549	341	GO:0008299; GO:0016740	transferase activity [GO:0016740]; isoprenoid biosynthetic process [GO:0008299]	PF00348;	SIGNAL 1 19 {ECO:0000256|SAM:SignalP}.	1 out of 5	NULL	KID66313;	K18385
MAN_00122	213.876	8.36561	0.659194	12.6907	6.66227e-37	3.47907e-36	417.925	401.149	477.227	409.487	3.06989	2.14816	0	0	KID70523.1	180	hypothetical protein MAN_00122, partial	MAN_00122	A0A0B4FJB2	A0A0B4FJB2_METAN	unreviewed	Uncharacterized protein (Fragment)	Metarhizium anisopliae ARSEF 549	180	NULL	NULL	NULL	SIGNAL 1 18 {ECO:0000256|SAM:SignalP}.	1 out of 5	NULL	KID70523;	NULL
MAN_07719	5235.91	8.28333	0.160747	51.5303	0	0	11101.1	10883.6	9515.57	10253.7	42.9785	18.2594	45.2281	26.8059	KID63518.1	647	collagen-like protein Mcl1, partial	MAN_07719	A0A0B4EZF1	A0A0B4EZF1_METAN	unreviewed	Collagen-like protein Mcl1 (Fragment)	Metarhizium anisopliae ARSEF 549	647	NULL	NULL	NULL	SIGNAL 1 19 {ECO:0000256|SAM:SignalP}.	1 out of 5	NULL	KID63518;	NULL
MAN_00295	824.396	8.17696	0.326948	25.0099	4.76759e-138	1.00932e-136	1662.43	1437.37	1669.66	1803.13	2.04659	5.37041	12.0608	3.09299	KID70696.1	295	hypothetical protein MAN_00295, partial	MAN_00295	A0A0B4FYH0	A0A0B4FYH0_METAN	unreviewed	Uncharacterized protein (Fragment)	Metarhizium anisopliae ARSEF 549	295	NULL	NULL	NULL	NULL	1 out of 5	NULL	KID70696;	NULL
MAN_06505	184.064	8.15079	0.666727	12.2251	2.28333e-34	1.11892e-33	396.86	410.543	362.642	297.334	3.06989	0	0	2.06199	KID64331.1	383	quercetin 2,3-dioxygenase, partial	MAN_06505	A0A0B4FEQ9	A0A0B4FEQ9_METAN	unreviewed	Quercetin 2,3-dioxygenase (Fragment)	Metarhizium anisopliae ARSEF 549	383	GO:0051213	dioxygenase activity [GO:0051213]	NULL	SIGNAL 1 18 {ECO:0000256|SAM:SignalP}.	1 out of 5	NULL	KID64331;	NULL
MAN_08053	3170.56	8.104	0.174588	46.4178	0	0	6713.77	6479.44	5997.44	6082.31	12.2796	18.2594	33.1673	27.8369	KID62837.1	363	Alternative oxidase, partial	MAN_08053	A0A0B4F4W2	A0A0B4F4W2_METAN	unreviewed	Alternative oxidase (EC 1.-.-.-) (Fragment)	Metarhizium anisopliae ARSEF 549	363	GO:0009916; GO:0016021; GO:0046872; GO:0070469	integral component of membrane [GO:0016021]; respiratory chain [GO:0070469]; alternative oxidase activity [GO:0009916]; metal ion binding [GO:0046872]	PF01786;	NULL	2 out of 5	NULL	KID62837;	NULL
MAN_01712	11069.6	8.05056	0.11272	71.4209	0	0	21572.9	21098.3	23129.7	22422.7	101.306	87.0007	60.3041	84.5417	KID69198.1	585	myosin-cross-reactive antigen-like protein, partial	MAN_01712	A0A0B4FFG2	A0A0B4FFG2_METAN	unreviewed	Myosin-cross-reactive antigen-like protein (Fragment)	Metarhizium anisopliae ARSEF 549	585	GO:0006631; GO:0016491; GO:0050151; GO:0071949	FAD binding [GO:0071949]; oleate hydratase activity [GO:0050151]; oxidoreductase activity [GO:0016491]; fatty acid metabolic process [GO:0006631]	PF06100;	NULL	1 out of 5	NULL	KID69198;	NULL
MAN_05460	197.249	7.98446	0.603974	13.2199	6.73809e-40	3.75761e-39	369.898	395.512	428.119	378.188	2.04659	3.22225	1.00507	0	KID65801.1	302	Helix-loop-helix DNA-binding protein, partial	MAN_05460	A0A0B4FIY6	A0A0B4FIY6_METAN	unreviewed	Helix-loop-helix DNA-binding protein (Fragment)	Metarhizium anisopliae ARSEF 549	302	GO:0003677; GO:0046983	DNA binding [GO:0003677]; protein dimerization activity [GO:0046983]	PF00010;	NULL	1 out of 5	NULL	KID65801;	NULL
MAN_10476	2921.25	7.87417	0.167291	47.0687	0	0	5838.31	5450.73	6334.9	5646.74	26.6057	26.8521	21.1064	24.7439	KID59670.1	142	conidial pigment polyketide synthase PksP/Alb1, partial	MAN_10476	A0A0B4EBU4	A0A0B4EBU4_METAN	unreviewed	Conidial pigment polyketide synthase PksP/Alb1 (Fragment)	Metarhizium anisopliae ARSEF 549	142	NULL	NULL	PF07110;	NULL	1 out of 5	NULL	KID59670;	NULL
MAN_09407	120.135	7.85406	0.740168	10.6112	2.6436e-26	1.05197e-25	229.185	232.986	264.426	230.391	4.09319	0	0	0	KID61123.1	174	hypothetical protein MAN_09407, partial	MAN_09407	A0A0B4ESM6	A0A0B4ESM6_METAN	unreviewed	Uncharacterized protein (Fragment)	Metarhizium anisopliae ARSEF 549	174	NULL	NULL	NULL	SIGNAL 1 18 {ECO:0000256|SAM:SignalP}.	1 out of 5	NULL	KID61123;	NULL
MAN_05649	266.217	7.83518	0.495168	15.8233	2.14979e-56	1.67109e-55	525.777	558.038	509.965	526.856	3.06989	0	6.03041	0	KID65990.1	372	heat-labile enterotoxin IIB, A chain, partial	MAN_05649	A0A0B4EVM2	A0A0B4EVM2_METAN	unreviewed	Heat-labile enterotoxin IIB, A chain (Fragment)	Metarhizium anisopliae ARSEF 549	372	NULL	NULL	NULL	SIGNAL 1 20 {ECO:0000256|SAM:SignalP}.	1 out of 5	NULL	KID65990;	NULL
MAN_04666	10637.1	7.81259	0.0997778	78.2999	0	0	20806.9	20469.8	22600.9	20843	92.0968	84.8525	99.5018	100.007	KID66385.1	531	3-hydroxyphenylacetate 6 hydroxylase, partial	MAN_04666	A0A0B4EWR9	A0A0B4EWR9_METAN	unreviewed	3-hydroxyphenylacetate 6 hydroxylase (Fragment)	Metarhizium anisopliae ARSEF 549	531	GO:0005506; GO:0016705; GO:0020037	heme binding [GO:0020037]; iron ion binding [GO:0005506]; oxidoreductase activity, acting on paired donors, with incorporation or reduction of molecular oxygen [GO:0016705]	PF00067;	NULL	1 out of 5	NULL	KID66385;	K10438
MAN_00868	1093.91	7.75666	0.244649	31.7053	1.31229e-220	5.83541e-219	2235.39	2235.91	2065.04	2174.37	14.3262	13.9631	5.02534	7.21697	KID71269.1	113	hypothetical protein MAN_00868, partial	MAN_00868	A0A0B4GT80	A0A0B4GT80_METAN	unreviewed	Uncharacterized protein (Fragment)	Metarhizium anisopliae ARSEF 549	113	NULL	NULL	NULL	SIGNAL 1 19 {ECO:0000256|SAM:SignalP}.	1 out of 5	NULL	KID71269;	NULL
MAN_01654	20.3504	7.7443	1.0928	7.08665	1.37396e-12	3.46484e-12	53.0832	38.5178	39.0344	32.1678	0	0	0	0	KID69140.1	458	succinate semialdehyde dehydrogenase, partial	MAN_01654	A0A0B4F4X1	A0A0B4F4X1_METAN	unreviewed	Succinate semialdehyde dehydrogenase (Fragment)	Metarhizium anisopliae ARSEF 549	458	GO:0016491	oxidoreductase activity [GO:0016491]	PF00171;	NULL	1 out of 5	NULL	KID69140;	NULL
MAN_04667	20.0286	7.71637	1.09542	7.04422	1.86504e-12	4.67431e-12	43.8147	28.1837	49.1077	39.1229	0	0	0	0	KID66386.1	395	hypothetical protein MAN_04667, partial	MAN_04667	A0A0B4FKM4	A0A0B4FKM4_METAN	unreviewed	Uncharacterized protein (Fragment)	Metarhizium anisopliae ARSEF 549	395	GO:0016021	integral component of membrane [GO:0016021]	NULL	SIGNAL 1 20 {ECO:0000256|SAM:SignalP}.	1 out of 5	NULL	KID66386;	NULL
MAN_06205	79.6584	7.67863	0.858722	8.94193	3.82436e-19	1.23317e-18	159.25	134.342	162.433	178.227	0	0	3.01521	0	KID65194.1	258	NAD(P)-binding domain protein, partial	MAN_06205	A0A0B4GA31	A0A0B4GA31_METAN	unreviewed	NAD(P)-binding domain protein (Fragment)	Metarhizium anisopliae ARSEF 549	258	NULL	NULL	PF00106;	NULL	1 out of 5	NULL	KID65194;	NULL
MAN_00980	2526.2	7.53463	0.15841	47.564	0	0	4924.95	4857	5184.02	5135.54	29.6756	17.1853	24.1216	37.1159	KID71381.1	110	hypothetical protein MAN_00980, partial	MAN_00980	A0A0B4G095	A0A0B4G095_METAN	unreviewed	Uncharacterized protein (Fragment)	Metarhizium anisopliae ARSEF 549	110	NULL	NULL	NULL	NULL	1 out of 5	NULL	KID71381;	NULL
MAN_00296	1152.1	7.47312	0.418524	17.8559	2.60187e-71	2.51136e-70	2298.59	2092.17	2394.95	2379.54	21.4892	6.44449	4.02027	19.5889	KID70697.1	426	indoleamine 2,3-dioxygenase pyrrole 2,3-dioxygenase, partial	MAN_00296	A0A0B4FSK5	A0A0B4FSK5_METAN	unreviewed	Indoleamine 2,3-dioxygenase pyrrole 2,3-dioxygenase (Fragment)	Metarhizium anisopliae ARSEF 549	426	GO:0020037; GO:0051213	dioxygenase activity [GO:0051213]; heme binding [GO:0020037]	PF01231;	NULL	1 out of 5	NULL	KID70697;	K00463
MAN_04562	455.788	7.38371	0.330614	22.3333	1.75495e-110	2.77495e-109	861.128	916.911	974.6	872.007	5.11649	4.29633	5.02534	7.21697	KID66281.1	444	Monooxygenase, FAD-binding protein, partial	MAN_04562	A0A0B4FKC8	A0A0B4FKC8_METAN	unreviewed	Monooxygenase, FAD-binding protein (Fragment)	Metarhizium anisopliae ARSEF 549	444	GO:0004497; GO:0016021; GO:0071949	integral component of membrane [GO:0016021]; FAD binding [GO:0071949]; monooxygenase activity [GO:0004497]	PF01494;	NULL	1 out of 5	NULL	KID66281;	K00480
MAN_07483	2672.53	7.32968	0.150506	48.7002	0	0	5241.76	5203.66	5550.43	5252.91	42.9785	16.1112	32.1622	40.2088	KID63282.1	458	reductase, partial	MAN_07483	A0A0B4F657	A0A0B4F657_METAN	unreviewed	Reductase (Fragment)	Metarhizium anisopliae ARSEF 549	458	GO:0016021; GO:0016491; GO:0020037; GO:0046872	integral component of membrane [GO:0016021]; heme binding [GO:0020037]; metal ion binding [GO:0046872]; oxidoreductase activity [GO:0016491]	PF00173;PF00970;PF00175;	NULL	1 out of 5	NULL	KID63282;	K00326
MAN_06741	5399.99	7.3001	0.122596	59.5462	0	0	10671.4	10157.4	10976.2	11123.1	88.0036	47.2596	63.3193	73.2007	KID64567.1	468	prolyl aminopeptidase (secreted protein), partial	MAN_06741	A0A0B4FA33	A0A0B4FA33_METAN	unreviewed	Prolyl aminopeptidase (Secreted protein) (Fragment)	Metarhizium anisopliae ARSEF 549	468	GO:0004177; GO:0004806; GO:0016042	aminopeptidase activity [GO:0004177]; triglyceride lipase activity [GO:0004806]; lipid catabolic process [GO:0016042]	PF03583;	SIGNAL 1 18 {ECO:0000256|SAM:SignalP}.	1 out of 5	NULL	KID64567;	NULL
MAN_02742	14.0798	7.20486	1.16034	6.20929	5.32257e-10	1.20793e-09	29.4907	31.9416	39.0344	12.1716	0	0	0	0	KID70228.1	510	cytochrome P450, partial	MAN_02742	A0A0B4FIF0	A0A0B4FIF0_METAN	unreviewed	Cytochrome P450 (Fragment)	Metarhizium anisopliae ARSEF 549	510	GO:0004497; GO:0005506; GO:0016705; GO:0020037	heme binding [GO:0020037]; iron ion binding [GO:0005506]; monooxygenase activity [GO:0004497]; oxidoreductase activity, acting on paired donors, with incorporation or reduction of molecular oxygen [GO:0016705]	PF00067;	NULL	1 out of 5	NULL	KID70228;	NULL
MAN_06813	13.5977	7.16262	1.1294	6.34198	2.2683e-10	5.22227e-10	37.9166	24.4259	26.4426	19.9962	0	0	0	0	KID64639.1	619	Peptidase S8/S53, subtilisin/kexin/sedolisin, partial	MAN_06813	A0A0B4G8C4	A0A0B4G8C4_METAN	unreviewed	Peptidase S8/S53, subtilisin/kexin/sedolisin (Fragment)	Metarhizium anisopliae ARSEF 549	619	GO:0004252	serine-type endopeptidase activity [GO:0004252]	PF00082;	NULL	1 out of 5	NULL	KID64639;	NULL
MAN_05704	47887.5	7.15772	0.10846	65.9941	0	0	98777.8	96882.5	89519.6	95254.8	777.706	737.895	613.092	536.118	KID66045.1	419	flavohemoglobin, partial	MAN_05704	A0A0B4EVX1	A0A0B4EVX1_METAN	unreviewed	Flavohemoglobin (Fragment)	Metarhizium anisopliae ARSEF 549	419	GO:0016491; GO:0020037	heme binding [GO:0020037]; oxidoreductase activity [GO:0016491]	PF00042;PF00175;	NULL	1 out of 5	NULL	KID66045;	K05916
MAN_00671	4750.78	7.14483	0.118129	60.483	0	0	9578.58	10064.4	9047.16	9048.7	56.2814	82.7043	59.2991	69.0767	KID71072.1	1083	Concanavalin A-like lectin/glucanase, partial	MAN_00671	A0A0B4FTP1	A0A0B4FTP1_METAN	unreviewed	Concanavalin A-like lectin/glucanase (Fragment)	Metarhizium anisopliae ARSEF 549	1083	GO:0004553; GO:0005975; GO:0030246	carbohydrate binding [GO:0030246]; hydrolase activity, hydrolyzing O-glycosyl compounds [GO:0004553]; carbohydrate metabolic process [GO:0005975]	PF00722;PF01822;	NULL	1 out of 5	NULL	KID71072;	NULL
MAN_10677	6095.22	7.14405	0.133862	53.3688	0	0	11898.2	11807.1	12863.7	11849.9	108.47	104.186	69.3497	60.8288	KID59507.1	410	cytochrome P450, partial	MAN_10677	A0A0B4EUV3	A0A0B4EUV3_METAN	unreviewed	Cytochrome P450 (Fragment)	Metarhizium anisopliae ARSEF 549	410	GO:0004497; GO:0005506; GO:0016705; GO:0020037	heme binding [GO:0020037]; iron ion binding [GO:0005506]; monooxygenase activity [GO:0004497]; oxidoreductase activity, acting on paired donors, with incorporation or reduction of molecular oxygen [GO:0016705]	PF00067;	NULL	1 out of 5	NULL	KID59507;	K15877
MAN_09396	1028.3	7.09075	0.224681	31.5593	1.33842e-218	5.79963e-217	1841.9	2012.32	2393.69	1918.76	12.2796	9.66674	13.0659	24.7439	KID61112.1	286	hypothetical protein MAN_09396, partial	MAN_09396	A0A0B4EZS4	A0A0B4EZS4_METAN	unreviewed	Uncharacterized protein (Fragment)	Metarhizium anisopliae ARSEF 549	286	NULL	NULL	NULL	NULL	1 out of 5	NULL	KID61112;	NULL
MAN_01768	12.651	7.0514	1.13021	6.23903	4.40285e-10	1.00255e-09	27.8055	20.6681	32.7385	19.9962	0	0	0	0	KID69254.1	625	hypothetical protein MAN_01768, partial	MAN_01768	A0A0B4GLW7	A0A0B4GLW7_METAN	unreviewed	Uncharacterized protein (Fragment)	Metarhizium anisopliae ARSEF 549	625	NULL	NULL	NULL	NULL	1 out of 5	NULL	KID69254;	NULL
MAN_09394	18562.5	6.99355	0.0831003	84.158	0	0	36014.9	36045.1	39052	36233.1	302.896	247.039	318.607	286.617	KID61110.1	308	phytanoyl-CoA dioxygenase, partial	MAN_09394	A0A0B4EG48	A0A0B4EG48_METAN	unreviewed	Phytanoyl-CoA dioxygenase (Fragment)	Metarhizium anisopliae ARSEF 549	308	GO:0051213	dioxygenase activity [GO:0051213]	PF05721;	NULL	1 out of 5	NULL	KID61110;	NULL
MAN_05544	82.9454	6.99306	0.674994	10.3602	3.7626e-25	1.44365e-24	153.352	161.587	180.062	163.447	5.11649	0	0	0	KID65885.1	800	Ankyrin repeat-containing domain protein, partial	MAN_05544	A0A0B4EVA5	A0A0B4EVA5_METAN	unreviewed	Ankyrin repeat-containing domain protein (Fragment)	Metarhizium anisopliae ARSEF 549	800	NULL	NULL	PF12796;PF00622;	NULL	1 out of 5	NULL	KID65885;	NULL
MAN_10031	11.5556	6.91666	1.15621	5.98218	2.20175e-09	4.84242e-09	22.75	18.7892	35.2568	15.6492	0	0	0	0	KID60214.1	450	ankyrin repeat domain protein 17 isoform a, partial	MAN_10031	A0A0B4FVE3	A0A0B4FVE3_METAN	unreviewed	Ankyrin repeat domain protein 17 isoform a (Fragment)	Metarhizium anisopliae ARSEF 549	450	GO:0016021	integral component of membrane [GO:0016021]	PF00023;PF12796;	NULL	1 out of 5	NULL	KID60214;	NULL
MAN_10283	11.4694	6.91468	1.1252	6.14527	7.98257e-10	1.79559e-09	22.75	21.6075	23.9243	23.4738	0	0	0	0	KID60033.1	492	alpha-galactosidase, partial	MAN_10283	A0A0B4EPA9	A0A0B4EPA9_METAN	unreviewed	Alpha-galactosidase (Fragment)	Metarhizium anisopliae ARSEF 549	492	GO:0003824	catalytic activity [GO:0003824]	NULL	SIGNAL 1 18 {ECO:0000256|SAM:SignalP}.	1 out of 5	NULL	KID60033;	NULL
MAN_01649	11.4024	6.90775	1.14641	6.02553	1.68559e-09	3.72896e-09	18.537	17.8497	22.6651	32.1678	0	0	0	0	KID69135.1	221	eEF-1B gamma subunit-like protein, partial	MAN_01649	A0A0B4F4W8	A0A0B4F4W8_METAN	unreviewed	EEF-1B gamma subunit-like protein (Fragment)	Metarhizium anisopliae ARSEF 549	221	NULL	NULL	PF00043;PF02798;	NULL	1 out of 5	NULL	KID69135;	K03233
MAN_09372	11.3003	6.89751	1.15734	5.95979	2.52555e-09	5.52831e-09	16.0092	31.9416	16.3692	26.082	0	0	0	0	KID61088.1	387	polyketide synthetase PksP, partial	MAN_09372	A0A0B4ESJ6	A0A0B4ESJ6_METAN	unreviewed	Polyketide synthetase PksP (Fragment)	Metarhizium anisopliae ARSEF 549	387	GO:0016021	integral component of membrane [GO:0016021]	NULL	NULL	1 out of 5	NULL	KID61088;	NULL
MAN_01976	6373.78	6.76332	0.10762	62.8447	0	0	12113.9	12243	13458	12709.7	138.145	129.964	101.512	95.8826	KID69462.1	525	succinyl-CoA:3-ketoacid-coenzyme A transferase, partial	MAN_01976	A0A0B4FNV9	A0A0B4FNV9_METAN	unreviewed	Succinyl-CoA:3-ketoacid-coenzyme A transferase (Fragment)	Metarhizium anisopliae ARSEF 549	525	GO:0008410; GO:0046952	CoA-transferase activity [GO:0008410]; ketone body catabolic process [GO:0046952]	PF01144;	NULL	1 out of 5	NULL	KID69462;	K01027
MAN_00815	31568	6.6512	0.102847	64.6709	0	0	59821.4	59449.8	68273.6	62510.6	672.306	667.005	492.484	656.745	KID71216.1	252	NRPS like protein, partial	MAN_00815	A0A0B4FZT4	A0A0B4FZT4_METAN	unreviewed	NRPS like protein (Fragment)	Metarhizium anisopliae ARSEF 549	252	NULL	NULL	PF05050;	NULL	1 out of 5	NULL	KID71216;	NULL
MAN_05648	456.246	6.5914	0.601096	10.9656	5.59149e-28	2.34313e-27	938.647	868.999	892.754	911.999	0	17.1853	9.04562	11.341	KID65989.1	350	hypothetical protein MAN_05648, partial	MAN_05648	A0A0B4GCG6	A0A0B4GCG6_METAN	unreviewed	Uncharacterized protein (Fragment)	Metarhizium anisopliae ARSEF 549	350	NULL	NULL	NULL	SIGNAL 1 21 {ECO:0000256|SAM:SignalP}.	1 out of 5	NULL	KID65989;	NULL
MAN_03630	3946.21	6.58482	0.106163	62.0255	0	0	7749.31	7487.48	8329.43	7677.66	80.8405	87.0007	72.3649	85.5727	KID68774.1	153	ribose 5-phosphate isomerase, partial	MAN_03630	A0A0B4GKE8	A0A0B4GKE8_METAN	unreviewed	Ribose 5-phosphate isomerase (Fragment)	Metarhizium anisopliae ARSEF 549	153	GO:0004751; GO:0005975	ribose-5-phosphate isomerase activity [GO:0004751]; carbohydrate metabolic process [GO:0005975]	PF02502;	NULL	1 out of 5	NULL	KID68774;	K01808
MAN_06201	9.07532	6.57708	1.1574	5.68265	1.32621e-08	2.81233e-08	16.0092	15.9708	18.8876	21.735	0	0	0	0	KID65190.1	409	Monooxygenase, FAD-binding protein, partial	MAN_06201	A0A0B4ETD9	A0A0B4ETD9_METAN	unreviewed	Monooxygenase, FAD-binding protein (Fragment)	Metarhizium anisopliae ARSEF 549	409	GO:0004497; GO:0071949	FAD binding [GO:0071949]; monooxygenase activity [GO:0004497]	PF01494;	NULL	1 out of 5	NULL	KID65190;	NULL
MAN_07137	6031.91	6.56026	0.104342	62.8724	0	0	11764.3	11176.7	12324.8	12483.7	116.656	113.853	117.593	157.742	KID63966.1	306	NmrA family transcriptional regulator, partial	MAN_07137	A0A0B4FDK2	A0A0B4FDK2_METAN	unreviewed	NmrA family transcriptional regulator (Fragment)	Metarhizium anisopliae ARSEF 549	306	NULL	NULL	PF05368;	NULL	1 out of 5	NULL	KID63966;	NULL
MAN_00742	8.96852	6.55929	1.20732	5.43291	5.54424e-08	1.13004e-07	20.2222	7.51566	21.4059	22.6044	0	0	0	0	KID71143.1	547	allantoate permease, partial	MAN_00742	A0A0B4FL29	A0A0B4FL29_METAN	unreviewed	Allantoate permease (Fragment)	Metarhizium anisopliae ARSEF 549	547	GO:0016021; GO:0055085	integral component of membrane [GO:0016021]; transmembrane transport [GO:0055085]	PF07690;	NULL	1 out of 5	NULL	KID71143;	NULL
MAN_07731	81.6835	6.48024	0.584679	11.0834	1.51004e-28	6.42302e-28	136.5	155.011	191.394	163.447	3.06989	0	3.01521	1.031	KID63530.1	95	hypothetical protein MAN_07731, partial	MAN_07731	A0A0B4ENC8	A0A0B4ENC8_METAN	unreviewed	Uncharacterized protein (Fragment)	Metarhizium anisopliae ARSEF 549	95	GO:0016021	integral component of membrane [GO:0016021]	PF08592;	NULL	1 out of 5	NULL	KID63530;	NULL
MAN_07730	921.52	6.42515	0.185169	34.6989	8.17437e-264	5.17016e-262	1739.95	1720.15	1956.75	1870.08	18.4194	32.2225	18.0912	16.4959	KID63529.1	170	hypothetical protein MAN_07730, partial	MAN_07730	A0A0B4G550	A0A0B4G550_METAN	unreviewed	Uncharacterized protein (Fragment)	Metarhizium anisopliae ARSEF 549	170	GO:0016021	integral component of membrane [GO:0016021]	PF08592;	NULL	1 out of 5	NULL	KID63529;	NULL
MAN_00026	4159.42	6.40383	0.148122	43.2336	0	0	8197.57	7904.6	8504.45	8281.02	138.145	67.6672	101.512	80.4177	KID70427.1	340	alcohol dehydrogenase, partial	MAN_00026	A0A0B4FRS8	A0A0B4FRS8_METAN	unreviewed	Alcohol dehydrogenase (Fragment)	Metarhizium anisopliae ARSEF 549	340	GO:0008270; GO:0016491	oxidoreductase activity [GO:0016491]; zinc ion binding [GO:0008270]	PF08240;PF00107;	NULL	1 out of 5	NULL	KID70427;	NULL
MAN_06069	54.973	6.39124	0.708483	9.02102	1.86351e-19	6.06847e-19	85.9443	96.7642	139.768	112.152	0	0	0	5.15498	KID65058.1	132	cytochrome b5, partial	MAN_06069	A0A0B4F3M8	A0A0B4F3M8_METAN	unreviewed	Cytochrome b5 (Fragment)	Metarhizium anisopliae ARSEF 549	132	GO:0016021; GO:0020037; GO:0046872	integral component of membrane [GO:0016021]; heme binding [GO:0020037]; metal ion binding [GO:0046872]	PF00173;	NULL	1 out of 5	NULL	KID65058;	NULL
MAN_05762	7.62596	6.33625	1.25383	5.05353	4.33713e-07	8.39639e-07	15.1666	22.547	5.03669	18.2574	0	0	0	0	KID66103.1	314	Esterase/lipase, partial	MAN_05762	A0A0B4F6I6	A0A0B4F6I6_METAN	unreviewed	Esterase/lipase (Fragment)	Metarhizium anisopliae ARSEF 549	314	NULL	NULL	PF12697;	NULL	1 out of 5	NULL	KID66103;	NULL
MAN_10795	1742.46	6.32015	0.142845	44.2447	0	0	3332.45	3390.5	3728.41	3316.76	49.1183	30.0743	55.2788	37.1159	KID59303.1	487	Homogentisate 1,2-dioxygenase, partial	MAN_10795	A0A0B4ELY3	A0A0B4ELY3_METAN	unreviewed	Homogentisate 1,2-dioxygenase (Fragment)	Metarhizium anisopliae ARSEF 549	487	GO:0004411; GO:0006559; GO:0006570	homogentisate 1,2-dioxygenase activity [GO:0004411]; L-phenylalanine catabolic process [GO:0006559]; tyrosine metabolic process [GO:0006570]	PF04209;	NULL	1 out of 5	NULL	KID59303;	K00451
MAN_03213	5652.04	6.30382	0.119889	52.5803	0	0	10983.2	10773.7	11692.7	11202.2	173.961	104.186	126.639	159.804	KID68357.1	487	Pyridine nucleotide-disulfide oxidoreductase, FAD/NAD(P)-binding domain protein, partial	MAN_03213	A0A0B4FKF9	A0A0B4FKF9_METAN	unreviewed	Pyridine nucleotide-disulfide oxidoreductase, FAD/NAD(P)-binding domain protein (Fragment)	Metarhizium anisopliae ARSEF 549	487	GO:0016491	oxidoreductase activity [GO:0016491]	PF07992;	NULL	1 out of 5	NULL	KID68357;	K03885
MAN_04367	8923.73	6.21337	0.070412	88.2431	0	0	17525.1	17203.4	17827.4	17884.4	241.498	244.891	227.146	236.098	KID67609.1	1088	nitrite reductase, partial	MAN_04367	A0A0B4GH56	A0A0B4GH56_METAN	unreviewed	Nitrite reductase (Fragment)	Metarhizium anisopliae ARSEF 549	1088	GO:0008942; GO:0020037; GO:0042128; GO:0050660; GO:0050661; GO:0051537	2 iron, 2 sulfur cluster binding [GO:0051537]; flavin adenine dinucleotide binding [GO:0050660]; heme binding [GO:0020037]; NADP binding [GO:0050661]; nitrite reductase [NAD(P)H] activity [GO:0008942]; nitrate assimilation [GO:0042128]	PF04324;PF01077;PF03460;PF07992;PF00355;	NULL	1 out of 5	NULL	KID67609;	K17877
MAN_04444	34566.8	6.1913	0.077353	80.0396	0	0	71145	69889.1	64924.2	66842.9	1012.04	861.414	856.319	1003.16	KID67686.1	589	phosphoenolpyruvate carboxykinase, partial	MAN_04444	A0A0B4FPQ9	A0A0B4FPQ9_METAN	unreviewed	Phosphoenolpyruvate carboxykinase (Fragment)	Metarhizium anisopliae ARSEF 549	589	GO:0004612; GO:0005524; GO:0006094; GO:0016301	ATP binding [GO:0005524]; kinase activity [GO:0016301]; phosphoenolpyruvate carboxykinase (ATP) activity [GO:0004612]; gluconeogenesis [GO:0006094]	PF01293;	NULL	1 out of 5	NULL	KID67686;	K01610
MAN_01651	243.172	6.10306	0.301848	20.219	6.66289e-91	8.34542e-90	477.749	458.455	504.928	476.431	9.20968	4.29633	5.02534	9.27896	KID69137.1	3935	hybrid PKS-NRPS protein, partial	MAN_01651	A0A0B4FMW8	A0A0B4FMW8_METAN	unreviewed	Hybrid PKS-NRPS protein (Fragment)	Metarhizium anisopliae ARSEF 549	3935	GO:0008152; GO:0016740; GO:0031177	phosphopantetheine binding [GO:0031177]; transferase activity [GO:0016740]; metabolic process [GO:0008152]	PF00698;PF00501;PF00668;PF16197;PF00109;PF02801;PF08659;PF08242;PF07993;PF00550;PF14765;	NULL	1 out of 5	NULL	KID69137;	NULL
MAN_01083	2160.4	6.02759	0.153064	39.3795	0	0	4757.27	4548.86	3568.5	4147.9	88.0036	52.63	62.3143	57.7358	KID71484.1	279	Thiopurine S-methyltransferase, partial	MAN_01083	A0A0B4GTZ0	A0A0B4GTZ0_METAN	unreviewed	Thiopurine S-methyltransferase (Fragment)	Metarhizium anisopliae ARSEF 549	279	GO:0008757	S-adenosylmethionine-dependent methyltransferase activity [GO:0008757]	PF05724;	NULL	1 out of 5	NULL	KID71484;	NULL
MAN_10880	17.0341	6.0214	1.1242	5.35618	8.50011e-08	1.71569e-07	41.287	16.9102	37.7752	38.2535	2.04659	0	0	0	KID59149.1	299	hypothetical protein MAN_10880, partial	MAN_10880	A0A0B4FSC1	A0A0B4FSC1_METAN	unreviewed	Uncharacterized protein (Fragment)	Metarhizium anisopliae ARSEF 549	299	NULL	NULL	NULL	NULL	1 out of 5	NULL	KID59149;	NULL
MAN_08978	76.4988	6.01847	0.533173	11.288	1.50382e-29	6.56665e-29	121.333	165.345	167.47	148.667	0	0	4.02027	5.15498	KID61739.1	667	Monooxygenase, FAD-binding protein, partial	MAN_08978	A0A0B4FZT5	A0A0B4FZT5_METAN	unreviewed	Monooxygenase, FAD-binding protein (Fragment)	Metarhizium anisopliae ARSEF 549	667	GO:0004497; GO:0071949	FAD binding [GO:0071949]; monooxygenase activity [GO:0004497]	PF01494;PF07976;	NULL	1 out of 5	NULL	KID61739;	K03380
MAN_06789	42.4755	6.0083	0.726334	8.2721	1.3162e-16	3.903e-16	67.4073	66.7015	99.4747	100.85	0	5.37041	0	0	KID64615.1	183	might be a transmembrane protein, partial	MAN_06789	A0A0B4ERL6	A0A0B4ERL6_METAN	unreviewed	Might be a transmembrane protein (Fragment)	Metarhizium anisopliae ARSEF 549	183	GO:0016021	integral component of membrane [GO:0016021]	PF01284;	NULL	1 out of 5	NULL	KID64615;	NULL
MAN_10674	12594	5.99204	0.311336	19.2462	1.51836e-82	1.69719e-81	26378.2	26232.5	22153.9	24429.2	610.909	421.04	248.252	278.369	KID59504.1	278	globin-like-protein, partial	MAN_10674	A0A0B4FTE3	A0A0B4FTE3_METAN	unreviewed	Globin-like-protein (Fragment)	Metarhizium anisopliae ARSEF 549	278	NULL	NULL	NULL	NULL	1 out of 5	NULL	KID59504;	NULL
MAN_00054	6.01999	5.98851	1.22036	4.90717	9.24011e-07	1.75349e-06	10.9537	14.0919	10.0734	13.041	0	0	0	0	KID70455.1	351	CAP domain protein, partial	MAN_00054	A0A0B4F8M2	A0A0B4F8M2_METAN	unreviewed	CAP domain protein (Fragment)	Metarhizium anisopliae ARSEF 549	351	NULL	NULL	NULL	NULL	1 out of 5	NULL	KID70455;	NULL
MAN_06296	5709.63	5.9384	0.0998977	59.4448	0	0	11169.4	10616.8	11802.2	11355.2	214.892	196.557	150.76	171.145	KID65285.1	621	Lysophospholipase, catalytic domain protein, partial	MAN_06296	A0A0B4ETM9	A0A0B4ETM9_METAN	unreviewed	Lysophospholipase (EC 3.1.1.5) (Fragment)	Metarhizium anisopliae ARSEF 549	621	GO:0004622; GO:0009395	lysophospholipase activity [GO:0004622]; phospholipid catabolic process [GO:0009395]	PF01735;	NULL	1 out of 5	NULL	KID65285;	K13333
MAN_04037	1910.3	5.92689	0.121311	48.8569	0	0	3782.39	3739.98	3824.11	3687.99	51.1649	83.7784	55.2788	57.7358	KID67279.1	201	DUF967 domain protein, partial	MAN_04037	A0A0B4GG89	A0A0B4GG89_METAN	unreviewed	DUF967 domain protein (Fragment)	Metarhizium anisopliae ARSEF 549	201	NULL	NULL	PF03928;	NULL	1 out of 5	NULL	KID67279;	NULL
MAN_10657	118.706	5.91192	0.419851	14.081	4.97118e-45	3.09991e-44	195.481	253.654	269.463	215.611	5.11649	4.29633	6.03041	0	KID59487.1	548	C6 zinc finger domain protein, partial	MAN_10657	A0A0B4EUS7	A0A0B4EUS7_METAN	unreviewed	C6 zinc finger domain protein (Fragment)	Metarhizium anisopliae ARSEF 549	548	NULL	NULL	PF11951;	NULL	1 out of 5	NULL	KID59487;	NULL
MAN_06161	5.57783	5.87689	1.24132	4.73438	2.19722e-06	4.0829e-06	8.42591	12.213	10.0734	13.9104	0	0	0	0	KID65150.1	335	hypothetical protein MAN_06161, partial	MAN_06161	A0A0B4ETA5	A0A0B4ETA5_METAN	unreviewed	Uncharacterized protein (Fragment)	Metarhizium anisopliae ARSEF 549	335	GO:0008152; GO:0016787	hydrolase activity [GO:0016787]; metabolic process [GO:0008152]	PF07859;	NULL	1 out of 5	NULL	KID65150;	NULL
MAN_08974	60.7915	5.85592	0.555443	10.5428	5.48398e-26	2.1503e-25	133.129	116.493	105.771	122.585	3.06989	3.22225	0	2.06199	KID61735.1	180	hypothetical protein MAN_08974, partial	MAN_08974	A0A0B4EHX8	A0A0B4EHX8_METAN	unreviewed	Uncharacterized protein (Fragment)	Metarhizium anisopliae ARSEF 549	180	NULL	NULL	NULL	NULL	1 out of 5	NULL	KID61735;	NULL
MAN_09173	37.9302	5.85513	0.711162	8.23318	1.82303e-16	5.36894e-16	74.148	82.6723	66.7362	74.7683	5.11649	0	0	0	KID61408.1	483	metalloprotease 1, partial	MAN_09173	A0A0B4ETH3	A0A0B4ETH3_METAN	unreviewed	Metalloprotease 1 (Fragment)	Metarhizium anisopliae ARSEF 549	483	GO:0008237	metallopeptidase activity [GO:0008237]	PF05572;	SIGNAL 1 20 {ECO:0000256|SAM:SignalP}.	1 out of 5	NULL	KID61408;	NULL
MAN_09812	220.165	5.85289	0.301995	19.3807	1.12225e-83	1.28403e-82	439.833	437.787	449.525	404.27	0	8.59266	13.0659	8.24797	KID60677.1	2181	polyketide synthase, partial	MAN_09812	A0A0B4EYC8	A0A0B4EYC8_METAN	unreviewed	Polyketide synthase (Fragment)	Metarhizium anisopliae ARSEF 549	2181	GO:0008152; GO:0016740	transferase activity [GO:0016740]; metabolic process [GO:0008152]	PF00698;PF00109;PF02801;PF08242;PF00550;PF16073;	NULL	1 out of 5	NULL	KID60677;	NULL
MAN_05557	5.38163	5.81776	1.63084	3.56735	0.000360616	0.000572342	0	19.7286	16.3692	6.95519	0	0	0	0	KID65898.1	900	HET domain protein, partial	MAN_05557	A0A0B4F600	A0A0B4F600_METAN	unreviewed	HET domain protein (Fragment)	Metarhizium anisopliae ARSEF 549	900	NULL	NULL	PF06985;	NULL	1 out of 5	NULL	KID65898;	NULL
MAN_06147	183.976	5.80597	0.33087	17.5476	6.20955e-69	5.78517e-68	369.898	334.447	390.344	351.237	8.18638	4.29633	0	13.4029	KID65136.1	558	thiamine pyrophosphate enzyme, partial	MAN_06147	A0A0B4FH52	A0A0B4FH52_METAN	unreviewed	Thiamine pyrophosphate enzyme (Fragment)	Metarhizium anisopliae ARSEF 549	558	GO:0000287; GO:0003824; GO:0030976	catalytic activity [GO:0003824]; magnesium ion binding [GO:0000287]; thiamine pyrophosphate binding [GO:0030976]	PF02775;PF00205;PF02776;	NULL	1 out of 5	NULL	KID65136;	NULL
MAN_03629	4624.49	5.8045	0.0914073	63.5015	0	0	8911.24	8612.95	9820.29	9001.75	169.867	147.149	173.877	158.773	KID68773.1	591	dihydroxyacetone kinase, partial	MAN_03629	A0A0B4FE82	A0A0B4FE82_METAN	unreviewed	Dihydroxyacetone kinase (Fragment)	Metarhizium anisopliae ARSEF 549	591	GO:0004371; GO:0005524; GO:0006071	ATP binding [GO:0005524]; glycerone kinase activity [GO:0004371]; glycerol metabolic process [GO:0006071]	PF02733;PF02734;	NULL	1 out of 5	NULL	KID68773;	K00863
MAN_09802	8532.72	5.78966	0.0917136	63.1275	0	0	17466.1	17962.4	15655.3	15966.5	337.688	261.002	306.546	306.206	KID60667.1	494	aldehyde dehydrogenase, partial	MAN_09802	A0A0B4EYC0	A0A0B4EYC0_METAN	unreviewed	Aldehyde dehydrogenase (Fragment)	Metarhizium anisopliae ARSEF 549	494	GO:0016491	oxidoreductase activity [GO:0016491]	PF00171;	NULL	1 out of 5	NULL	KID60667;	K00128
MAN_09073	5.076	5.73538	1.26905	4.51942	6.20087e-06	1.12235e-05	9.2685	6.57621	12.5917	12.1716	0	0	0	0	KID61308.1	270	hypothetical protein MAN_09073, partial	MAN_09073	A0A0B4ET52	A0A0B4ET52_METAN	unreviewed	Uncharacterized protein (Fragment)	Metarhizium anisopliae ARSEF 549	270	NULL	NULL	NULL	SIGNAL 1 19 {ECO:0000256|SAM:SignalP}.	1 out of 5	NULL	KID61308;	NULL
MAN_08523	3662.91	5.73258	0.095801	59.8384	0	0	7283.36	6645.73	7529.85	7303.82	137.122	128.89	150.76	123.72	KID61844.1	491	arrestin, partial	MAN_08523	A0A0B4G045	A0A0B4G045_METAN	unreviewed	Arrestin (Fragment)	Metarhizium anisopliae ARSEF 549	491	NULL	NULL	NULL	NULL	1 out of 5	NULL	KID61844;	NULL
MAN_02739	4.82204	5.66204	1.26973	4.45925	8.2246e-06	1.4784e-05	8.42591	7.51566	11.3326	11.3022	0	0	0	0	KID70225.1	235	alpha/beta hydrolase, partial	MAN_02739	A0A0B4F801	A0A0B4F801_METAN	unreviewed	Alpha/beta hydrolase (Fragment)	Metarhizium anisopliae ARSEF 549	235	GO:0016787	hydrolase activity [GO:0016787]	PF06500;	NULL	1 out of 5	NULL	KID70225;	NULL
MAN_10627	19.683	5.64003	0.921307	6.12177	9.25396e-10	2.07197e-09	38.7592	31.0021	40.2935	44.3393	3.06989	0	0	0	KID59457.1	683	sulfatase domain protein, partial	MAN_10627	A0A0B4EUN9	A0A0B4EUN9_METAN	unreviewed	Sulfatase domain protein (Fragment)	Metarhizium anisopliae ARSEF 549	683	GO:0008152; GO:0008484; GO:0016021	integral component of membrane [GO:0016021]; sulfuric ester hydrolase activity [GO:0008484]; metabolic process [GO:0008152]	PF00884;	NULL	1 out of 5	NULL	KID59457;	NULL
MAN_04593	90.9945	5.62882	0.82072	6.85839	6.96396e-12	1.70058e-11	185.37	165.345	186.358	176.488	5.11649	0	0	9.27896	KID66312.1	238	AtmB protein, partial	MAN_04593	A0A0B4FEL2	A0A0B4FEL2_METAN	unreviewed	AtmB protein (Fragment)	Metarhizium anisopliae ARSEF 549	238	GO:0016021	integral component of membrane [GO:0016021]	NULL	NULL	1 out of 5	NULL	KID66312;	K18387
MAN_04152	1674.86	5.61505	0.1329	42.2502	0	0	3374.58	3280.59	3341.85	3133.31	72.6541	90.2229	58.294	47.4258	KID67394.1	478	Amino acid transporter, transmembrane, partial	MAN_04152	A0A0B4GGI6	A0A0B4GGI6_METAN	unreviewed	Amino acid transporter, transmembrane (Fragment)	Metarhizium anisopliae ARSEF 549	478	GO:0016021	integral component of membrane [GO:0016021]	PF01490;	NULL	1 out of 5	NULL	KID67394;	NULL
MAN_04170	4.57001	5.59173	1.33062	4.20234	2.64167e-05	4.59439e-05	14.3241	10.334	7.55504	4.34699	0	0	0	0	KID67412.1	349	NmrA family protein, partial	MAN_04170	A0A0B4FHQ9	A0A0B4FHQ9_METAN	unreviewed	NmrA family protein (Fragment)	Metarhizium anisopliae ARSEF 549	349	NULL	NULL	PF05368;	NULL	1 out of 5	NULL	KID67412;	NULL
MAN_07307	1379.83	5.57872	0.12319	45.2854	0	0	2778.02	2812.74	2616.56	2604.72	47.0717	64.4449	55.2788	59.7978	KID63106.1	177	Major facilitator superfamily domain, general substrate transporter, partial	MAN_07307	A0A0B4FBH5	A0A0B4FBH5_METAN	unreviewed	Major facilitator superfamily domain, general substrate transporter (Fragment)	Metarhizium anisopliae ARSEF 549	177	GO:0016021	integral component of membrane [GO:0016021]	NULL	NULL	1 out of 5	NULL	KID63106;	NULL
MAN_00291	4.2715	5.49766	1.34245	4.09525	4.21719e-05	7.21621e-05	9.2685	4.69729	6.29587	13.9104	0	0	0	0	KID70692.1	321	hypothetical protein MAN_00291, partial	MAN_00291	A0A0B4FSK0	A0A0B4FSK0_METAN	unreviewed	Uncharacterized protein (Fragment)	Metarhizium anisopliae ARSEF 549	321	GO:0016021	integral component of membrane [GO:0016021]	PF01988;	NULL	1 out of 5	NULL	KID70692;	NULL
MAN_07308	1443.4	5.46255	0.123135	44.3624	0	0	2882.5	2822.13	2760.11	2826.42	80.8405	54.7782	49.2484	71.1387	KID63107.1	281	Major facilitator superfamily domain, general substrate transporter, partial	MAN_07308	A0A0B4F5S3	A0A0B4F5S3_METAN	unreviewed	Major facilitator superfamily domain, general substrate transporter (Fragment)	Metarhizium anisopliae ARSEF 549	281	GO:0016021; GO:0055085	integral component of membrane [GO:0016021]; transmembrane transport [GO:0055085]	PF07690;	NULL	1 out of 5	NULL	KID63107;	NULL
MAN_02969	1021.49	5.45877	0.1475	37.0085	8.36658e-300	6.65601e-298	2202.53	2022.65	1756.55	2008.31	41.9552	44.0374	41.2078	54.6428	KID68113.1	323	Mitochondrial carrier domain protein, partial	MAN_02969	A0A0B4FCA2	A0A0B4FCA2_METAN	unreviewed	Mitochondrial carrier domain protein (Fragment)	Metarhizium anisopliae ARSEF 549	323	GO:0016021; GO:0055085	integral component of membrane [GO:0016021]; transmembrane transport [GO:0055085]	PF00153;	NULL	1 out of 5	NULL	KID68113;	K15100
MAN_02779	1515.94	5.43632	0.123445	44.0382	0	0	2775.5	2747.91	3194.52	3135.92	64.4677	67.6672	69.3497	72.1697	KID67923.1	573	multidrug resistant protein, partial	MAN_02779	A0A0B4FBG7	A0A0B4FBG7_METAN	unreviewed	Multidrug resistant protein (Fragment)	Metarhizium anisopliae ARSEF 549	573	GO:0016021; GO:0055085	integral component of membrane [GO:0016021]; transmembrane transport [GO:0055085]	PF07690;	NULL	1 out of 5	NULL	KID67923;	NULL
MAN_04711	6551.8	5.41733	0.106008	51.1031	0	0	13830.3	13640	10522.9	13222.7	309.036	296.447	312.576	280.431	KID66430.1	546	isocitrate lyase, partial	MAN_04711	A0A0B4EWX1	A0A0B4EWX1_METAN	unreviewed	Isocitrate lyase (Fragment)	Metarhizium anisopliae ARSEF 549	546	GO:0004451; GO:0019752	isocitrate lyase activity [GO:0004451]; carboxylic acid metabolic process [GO:0019752]	PF00463;	NULL	1 out of 5	NULL	KID66430;	K01637
MAN_10575	56.2533	5.41107	0.507446	10.6633	1.51086e-26	6.07868e-26	102.796	113.674	105.771	117.369	3.06989	3.22225	0	4.12398	KID59531.1	131	hypothetical protein MAN_10575, partial	MAN_10575	A0A0B4F137	A0A0B4F137_METAN	unreviewed	Uncharacterized protein (Fragment)	Metarhizium anisopliae ARSEF 549	131	GO:0016021	integral component of membrane [GO:0016021]	NULL	NULL	1 out of 5	NULL	KID59531;	NULL
MAN_09810	22.4739	5.39421	0.852761	6.32558	2.52286e-10	5.80178e-10	26.1203	48.8518	57.922	42.6005	0	4.29633	0	0	KID60675.1	109	UbiA prenyltransferase family protein, partial	MAN_09810	A0A0B4EET3	A0A0B4EET3_METAN	unreviewed	UbiA prenyltransferase family protein (Fragment)	Metarhizium anisopliae ARSEF 549	109	GO:0016021; GO:0016765	integral component of membrane [GO:0016021]; transferase activity, transferring alkyl or aryl (other than methyl) groups [GO:0016765]	PF01040;	NULL	1 out of 5	NULL	KID60675;	NULL
MAN_01589	1802.56	5.3931	0.160892	33.52	2.46824e-246	1.3586e-244	3274.31	3356.68	3990.32	3463.68	65.491	111.705	99.5018	58.7668	KID69075.1	533	cytochrome P450 oxidoreductase GliC, partial	MAN_01589	A0A0B4F4S2	A0A0B4F4S2_METAN	unreviewed	Cytochrome P450 oxidoreductase GliC (Fragment)	Metarhizium anisopliae ARSEF 549	533	GO:0005506; GO:0016021; GO:0016705; GO:0020037	integral component of membrane [GO:0016021]; heme binding [GO:0020037]; iron ion binding [GO:0005506]; oxidoreductase activity, acting on paired donors, with incorporation or reduction of molecular oxygen [GO:0016705]	PF00067;	NULL	1 out of 5	NULL	KID69075;	NULL
MAN_01619	3.9952	5.38394	1.39442	3.86106	0.000112897	0.000186266	3.37036	4.69729	12.5917	11.3022	0	0	0	0	KID69105.1	375	polyketide synthase, partial	MAN_01619	A0A0B4F4U5	A0A0B4F4U5_METAN	unreviewed	Polyketide synthase (Fragment)	Metarhizium anisopliae ARSEF 549	375	GO:0009058; GO:0016788	hydrolase activity, acting on ester bonds [GO:0016788]; biosynthetic process [GO:0009058]	PF00550;PF00975;	NULL	1 out of 5	NULL	KID69105;	NULL
MAN_10534	27.0343	5.36005	0.75306	7.11769	1.09755e-12	2.7781e-12	58.1388	39.4572	55.4036	58.2497	0	0	5.02534	0	KID59593.1	307	hypothetical protein MAN_10534, partial	MAN_10534	A0A0B4EMY6	A0A0B4EMY6_METAN	unreviewed	Uncharacterized protein (Fragment)	Metarhizium anisopliae ARSEF 549	307	GO:0016021	integral component of membrane [GO:0016021]	NULL	NULL	1 out of 5	NULL	KID59593;	NULL
MAN_07482	823.907	5.35659	0.141905	37.7478	0	0	1573.96	1612.11	1611.74	1636.21	48.095	40.8151	29.147	39.1779	KID63281.1	551	monooxygenase, partial	MAN_07482	A0A0B4FBT0	A0A0B4FBT0_METAN	unreviewed	Monooxygenase (Fragment)	Metarhizium anisopliae ARSEF 549	551	GO:0004497; GO:0005506; GO:0016705; GO:0020037	heme binding [GO:0020037]; iron ion binding [GO:0005506]; monooxygenase activity [GO:0004497]; oxidoreductase activity, acting on paired donors, with incorporation or reduction of molecular oxygen [GO:0016705]	PF00067;	NULL	1 out of 5	NULL	KID63281;	NULL
MAN_02936	3.83098	5.33172	1.33531	3.99287	6.52785e-05	0.000110219	10.1111	5.63675	8.81421	6.08579	0	0	0	0	KID68080.1	96	hypothetical protein MAN_02936, partial	MAN_02936	A0A0B4F1Q9	A0A0B4F1Q9_METAN	unreviewed	Uncharacterized protein (Fragment)	Metarhizium anisopliae ARSEF 549	96	GO:0016021	integral component of membrane [GO:0016021]	NULL	NULL	1 out of 5	NULL	KID68080;	NULL
MAN_01590	3256.87	5.32074	0.120407	44.1895	0	0	6500.59	6562.11	6214.02	6142.3	142.238	175.075	197.999	120.627	KID69076.1	242	hypothetical protein MAN_01590, partial	MAN_01590	A0A0B4FTR4	A0A0B4FTR4_METAN	unreviewed	Uncharacterized protein (Fragment)	Metarhizium anisopliae ARSEF 549	242	NULL	NULL	NULL	NULL	1 out of 5	NULL	KID69076;	NULL
MAN_09408	3.69386	5.28693	1.41541	3.73528	0.000187509	0.000304481	13.4815	2.81837	6.29587	6.95519	0	0	0	0	KID61124.1	419	hypothetical protein MAN_09408, partial	MAN_09408	A0A0B4FXY0	A0A0B4FXY0_METAN	unreviewed	Uncharacterized protein (Fragment)	Metarhizium anisopliae ARSEF 549	419	GO:0016021	integral component of membrane [GO:0016021]	PF12505;	NULL	1 out of 5	NULL	KID61124;	NULL
MAN_00297	2947.18	5.28267	0.0880456	59.9992	0	0	5952.91	5750.42	5419.48	5864.09	147.355	141.779	145.735	155.68	KID70698.1	492	Kynureninase, partial	MAN_00297	A0A0B4FJS1	A0A0B4FJS1_METAN	unreviewed	Kynureninase (Fragment)	Metarhizium anisopliae ARSEF 549	492	GO:0005737; GO:0006569; GO:0009435; GO:0030170; GO:0030429	cytoplasm [GO:0005737]; kynureninase activity [GO:0030429]; pyridoxal phosphate binding [GO:0030170]; NAD biosynthetic process [GO:0009435]; tryptophan catabolic process [GO:0006569]	PF00266;	NULL	1 out of 5	NULL	KID70698;	K01556
MAN_08171	18830.6	5.23767	0.353223	14.8282	9.62352e-50	6.56811e-49	35771.4	35204.3	39269.8	36509.5	1650.58	902.229	778.928	557.769	KID62167.1	110	copper resistance protein Crd2, partial	MAN_08171	A0A0B4F2Y4	A0A0B4F2Y4_METAN	unreviewed	Copper resistance protein Crd2 (Fragment)	Metarhizium anisopliae ARSEF 549	110	NULL	NULL	NULL	NULL	1 out of 5	NULL	KID62167;	NULL
MAN_06204	74.1542	5.22549	0.426139	12.2624	1.44151e-34	7.10155e-34	152.509	148.434	122.14	154.753	2.04659	3.22225	7.03548	3.09299	KID65193.1	307	NAD(P)-binding domain protein, partial	MAN_06204	A0A0B4F3X5	A0A0B4F3X5_METAN	unreviewed	NAD(P)-binding domain protein (Fragment)	Metarhizium anisopliae ARSEF 549	307	NULL	NULL	PF05368;	NULL	1 out of 5	NULL	KID65193;	NULL
MAN_04614	356.398	5.22343	0.211467	24.7009	1.04653e-134	2.13992e-133	765.915	626.618	643.437	740.728	18.4194	18.2594	13.0659	24.7439	KID66333.1	282	enoyl-CoA hydratase/isomerase family protein, partial	MAN_04614	A0A0B4F738	A0A0B4F738_METAN	unreviewed	Enoyl-CoA hydratase/isomerase family protein (Fragment)	Metarhizium anisopliae ARSEF 549	282	GO:0008152; GO:0016853	isomerase activity [GO:0016853]; metabolic process [GO:0008152]	PF00378;	NULL	1 out of 5	NULL	KID66333;	NULL
MAN_02723	18415.9	5.21866	0.121434	42.9754	0	0	35658.5	34371	36733.9	36711.2	757.24	849.599	1113.62	1132.03	KID70209.1	350	Pyruvate/Phosphoenolpyruvate kinase, partial	MAN_02723	A0A0B4GPX8	A0A0B4GPX8_METAN	unreviewed	Pyruvate/Phosphoenolpyruvate kinase (Fragment)	Metarhizium anisopliae ARSEF 549	350	GO:0016301	kinase activity [GO:0016301]	NULL	NULL	1 out of 5	NULL	KID70209;	NULL
MAN_01657	1213.71	5.21743	0.12444	41.9271	0	0	2426.66	2350.52	2423.91	2254.35	75.724	69.8154	62.3143	46.3948	KID69143.1	443	Zn(2)-C6 fungal-type DNA-binding domain protein, partial	MAN_01657	A0A0B4FFB9	A0A0B4FFB9_METAN	unreviewed	Zn(2)-C6 fungal-type DNA-binding domain protein (Fragment)	Metarhizium anisopliae ARSEF 549	443	GO:0000981; GO:0003677; GO:0005634; GO:0008270	nucleus [GO:0005634]; DNA binding [GO:0003677]; RNA polymerase II transcription factor activity, sequence-specific DNA binding [GO:0000981]; zinc ion binding [GO:0008270]	PF00172;	NULL	1 out of 5	NULL	KID69143;	NULL
MAN_06617	3.52307	5.21685	1.45259	3.59141	0.000328897	0.000523632	5.89814	15.0313	3.77752	3.47759	0	0	0	0	KID64443.1	220	hypothetical protein MAN_06617, partial	MAN_06617	A0A0B4F1Y0	A0A0B4F1Y0_METAN	unreviewed	Uncharacterized protein (Fragment)	Metarhizium anisopliae ARSEF 549	220	NULL	NULL	PF14226;	NULL	1 out of 5	NULL	KID64443;	NULL
MAN_10673	12610.5	5.17482	0.35848	14.4354	3.09706e-47	2.02552e-46	24309.6	22997.9	25418.9	25440.3	1183.96	516.634	504.545	512.405	KID59503.1	539	exonuclease III, partial	MAN_10673	A0A0B4EMM4	A0A0B4EMM4_METAN	unreviewed	Exonuclease III (Fragment)	Metarhizium anisopliae ARSEF 549	539	GO:0004527	exonuclease activity [GO:0004527]	PF03372;	NULL	1 out of 5	NULL	KID59503;	NULL
MAN_10405	13862.9	5.15588	0.0836801	61.6142	0	0	27114.6	27208.6	26504.3	27050.5	694.819	705.672	891.496	733.038	KID59764.1	793	chitinase 18-18, partial	MAN_10405	A0A0B4FU52	A0A0B4FU52_METAN	unreviewed	Chitinase 18-18 (Fragment)	Metarhizium anisopliae ARSEF 549	793	GO:0005975	carbohydrate metabolic process [GO:0005975]	PF00704;	NULL	1 out of 5	NULL	KID59764;	K01183
MAN_00269	6744.58	5.1398	0.310454	16.5558	1.45482e-61	1.23248e-60	13382	12879	13575.1	12632.4	601.699	296.447	351.774	238.16	KID70670.1	315	Mitochondrial substrate/solute carrier, partial	MAN_00269	A0A0B4F9A5	A0A0B4F9A5_METAN	unreviewed	Mitochondrial substrate/solute carrier (Fragment)	Metarhizium anisopliae ARSEF 549	315	GO:0016021; GO:0055085	integral component of membrane [GO:0016021]; transmembrane transport [GO:0055085]	PF00153;	NULL	1 out of 5	NULL	KID70670;	K15102
MAN_10560	18.5724	5.1227	0.871094	5.88077	4.08358e-09	8.87011e-09	47.1851	35.6994	21.4059	39.9923	0	4.29633	0	0	KID59619.1	331	RTA-like protein, partial	MAN_10560	A0A0B4FTP6	A0A0B4FTP6_METAN	unreviewed	RTA-like protein (Fragment)	Metarhizium anisopliae ARSEF 549	331	GO:0006950; GO:0016021	integral component of membrane [GO:0016021]; response to stress [GO:0006950]	PF04479;	NULL	1 out of 5	NULL	KID59619;	NULL
MAN_07215	22.7733	5.10894	0.763377	6.69255	2.19307e-11	5.24843e-11	52.2407	44.1545	39.0344	41.7311	0	0	5.02534	0	KID64044.1	415	hypothetical protein MAN_07215, partial	MAN_07215	A0A0B4G6N7	A0A0B4G6N7_METAN	unreviewed	Uncharacterized protein (Fragment)	Metarhizium anisopliae ARSEF 549	415	NULL	NULL	NULL	NULL	1 out of 5	NULL	KID64044;	NULL
MAN_09148	3.24441	5.08161	1.39296	3.64806	0.000264225	0.00042345	5.89814	5.63675	10.0734	4.34699	0	0	0	0	KID61383.1	276	hypothetical protein MAN_09148, partial	MAN_09148	A0A0B4ETE6	A0A0B4ETE6_METAN	unreviewed	Uncharacterized protein (Fragment)	Metarhizium anisopliae ARSEF 549	276	NULL	NULL	NULL	SIGNAL 1 27 {ECO:0000256|SAM:SignalP}.	1 out of 5	NULL	KID61383;	NULL
MAN_04558	3.21115	5.06951	1.38674	3.65572	0.000256465	0.000411403	4.21296	6.57621	8.81421	6.08579	0	0	0	0	KID66277.1	570	oxidosqualene:lanosterol cyclase, partial	MAN_04558	A0A0B4FEH8	A0A0B4FEH8_METAN	unreviewed	Oxidosqualene:lanosterol cyclase (Fragment)	Metarhizium anisopliae ARSEF 549	570	GO:0016866	intramolecular transferase activity [GO:0016866]	PF13243;PF13249;	NULL	1 out of 5	NULL	KID66277;	K01852
MAN_04708	22.2661	5.06665	0.734997	6.89342	5.44653e-12	1.33676e-11	39.6018	48.8518	42.8119	41.7311	3.06989	0	0	2.06199	KID66427.1	144	Mannose-binding lectin, partial	MAN_04708	A0A0B4FEX3	A0A0B4FEX3_METAN	unreviewed	Mannose-binding lectin (Fragment)	Metarhizium anisopliae ARSEF 549	144	GO:0030246	carbohydrate binding [GO:0030246]	NULL	NULL	1 out of 5	NULL	KID66427;	NULL
MAN_10660	578.772	5.05506	0.442718	11.4182	3.39011e-30	1.50224e-29	1089.47	1060.65	1196.21	1148.48	52.1882	51.556	13.0659	18.5579	KID59490.1	381	putative domain, di-copper centre, partial	MAN_10660	A0A0B4EB98	A0A0B4EB98_METAN	unreviewed	Putative domain, di-copper centre (Fragment)	Metarhizium anisopliae ARSEF 549	381	GO:0016491; GO:0046872	metal ion binding [GO:0046872]; oxidoreductase activity [GO:0016491]	PF00264;	SIGNAL 1 22 {ECO:0000256|SAM:SignalP}.	1 out of 5	NULL	KID59490;	K00505
MAN_02740	8.74976	5.04858	1.19173	4.23635	2.27186e-05	3.96748e-05	22.75	21.6075	8.81421	14.7798	2.04659	0	0	0	KID70226.1	423	hypothetical protein MAN_02740, partial	MAN_02740	A0A0B4FX25	A0A0B4FX25_METAN	unreviewed	Uncharacterized protein (Fragment)	Metarhizium anisopliae ARSEF 549	423	NULL	NULL	NULL	SIGNAL 1 20 {ECO:0000256|SAM:SignalP}.	1 out of 5	NULL	KID70226;	NULL
MAN_01263	1288.11	5.04347	0.120674	41.7942	0	0	2506.71	2605.12	2321.92	2568.2	64.4677	64.4449	89.4511	84.5417	KID71664.1	873	beta-1,3-endoglucanase, partial	MAN_01263	A0A0B4GUJ3	A0A0B4GUJ3_METAN	unreviewed	Beta-1,3-endoglucanase (Fragment)	Metarhizium anisopliae ARSEF 549	873	GO:0004553; GO:0005975	hydrolase activity, hydrolyzing O-glycosyl compounds [GO:0004553]; carbohydrate metabolic process [GO:0005975]	PF00722;	SIGNAL 1 21 {ECO:0000256|SAM:SignalP}.	1 out of 5	NULL	KID71664;	NULL
MAN_10574	552.372	5.03122	0.158563	31.7301	5.97832e-221	2.67005e-219	1039.76	1170.56	1032.52	1045.02	35.8154	31.1484	31.1571	32.9919	KID59530.1	275	extracellular serine-rich protein, partial	MAN_10574	A0A0B4EBH3	A0A0B4EBH3_METAN	unreviewed	Extracellular serine-rich protein (Fragment)	Metarhizium anisopliae ARSEF 549	275	NULL	NULL	NULL	SIGNAL 1 23 {ECO:0000256|SAM:SignalP}.	1 out of 5	NULL	KID59530;	NULL
MAN_10878	25.9504	5.01602	0.691696	7.25176	4.11389e-13	1.06297e-12	44.6573	39.4572	64.2178	53.0333	0	3.22225	3.01521	0	KID59155.1	307	hypothetical protein MAN_10878, partial	MAN_10878	A0A0B4EA97	A0A0B4EA97_METAN	unreviewed	Uncharacterized protein (Fragment)	Metarhizium anisopliae ARSEF 549	307	GO:0016021	integral component of membrane [GO:0016021]	NULL	NULL	1 out of 5	NULL	KID59155;	NULL
MAN_00716	2361.42	5.01325	0.121152	41.3797	0	0	4332.6	4398.54	4969.96	4623.46	169.867	108.482	128.649	159.804	KID71117.1	76	hypothetical protein MAN_00716, partial	MAN_00716	A0A0B4FTS8	A0A0B4FTS8_METAN	unreviewed	Uncharacterized protein (Fragment)	Metarhizium anisopliae ARSEF 549	76	NULL	NULL	NULL	NULL	1 out of 5	NULL	KID71117;	NULL
MAN_01587	4172.58	5.00333	0.159761	31.3177	2.68122e-215	1.14238e-213	8024.84	8121.61	8336.98	7888.05	155.541	258.854	325.642	269.09	KID69073.1	1701	AMP-dependent synthetase/ligase, partial	MAN_01587	A0A0B4FF67	A0A0B4FF67_METAN	unreviewed	AMP-dependent synthetase/ligase (Fragment)	Metarhizium anisopliae ARSEF 549	1701	GO:0008152; GO:0016874	ligase activity [GO:0016874]; metabolic process [GO:0008152]	PF00501;PF00668;PF00550;	NULL	1 out of 5	NULL	KID69073;	NULL
MAN_10628	12.502	4.96787	0.979365	5.07254	3.9254e-07	7.62685e-07	18.537	20.6681	26.4426	31.2984	3.06989	0	0	0	KID59458.1	263	NAD(P)-binding domain protein, partial	MAN_10628	A0A0B4EMG4	A0A0B4EMG4_METAN	unreviewed	NAD(P)-binding domain protein (Fragment)	Metarhizium anisopliae ARSEF 549	263	NULL	NULL	NULL	NULL	1 out of 5	NULL	KID59458;	NULL
MAN_08351	6463.05	4.95889	0.164237	30.1934	2.88926e-200	1.07377e-198	12203.2	12314.4	13019.8	12556.7	587.373	303.965	389.967	328.888	KID62347.1	545	integral membrane protein, partial	MAN_08351	A0A0B4F3F9	A0A0B4F3F9_METAN	unreviewed	Integral membrane protein (Fragment)	Metarhizium anisopliae ARSEF 549	545	GO:0016021	integral component of membrane [GO:0016021]	PF10348;PF10355;	NULL	1 out of 5	NULL	KID62347;	NULL
MAN_00866	53.4121	4.94511	0.498153	9.92691	3.17966e-23	1.15596e-22	114.592	101.461	88.1421	109.544	8.18638	5.37041	0	0	KID71267.1	724	catalase, partial	MAN_00866	A0A0B4FU72	A0A0B4FU72_METAN	unreviewed	Catalase (Fragment)	Metarhizium anisopliae ARSEF 549	724	GO:0004096; GO:0006979; GO:0020037; GO:0046872	catalase activity [GO:0004096]; heme binding [GO:0020037]; metal ion binding [GO:0046872]; response to oxidative stress [GO:0006979]	PF00199;PF06628;PF01965;	NULL	1 out of 5	NULL	KID71267;	K03781
MAN_06745	339.993	4.94398	0.199628	24.7659	2.08876e-135	4.28828e-134	731.369	637.892	581.738	683.347	17.3961	19.3335	24.1216	24.7439	KID64571.1	432	Globin, partial	MAN_06745	A0A0B4FFI9	A0A0B4FFI9_METAN	unreviewed	Globin (Fragment)	Metarhizium anisopliae ARSEF 549	432	GO:0005344; GO:0016491; GO:0020037; GO:0046872	heme binding [GO:0020037]; metal ion binding [GO:0046872]; oxidoreductase activity [GO:0016491]; oxygen transporter activity [GO:0005344]	PF00042;PF00175;	NULL	1 out of 5	NULL	KID64571;	NULL
MAN_10540	8.26244	4.94311	1.20354	4.10714	4.00582e-05	6.86028e-05	9.2685	12.213	25.1835	17.388	2.04659	0	0	0	KID59599.1	183	hypothetical protein MAN_10540, partial	MAN_10540	A0A0B4FTN1	A0A0B4FTN1_METAN	unreviewed	Uncharacterized protein (Fragment)	Metarhizium anisopliae ARSEF 549	183	GO:0016021	integral component of membrane [GO:0016021]	NULL	NULL	1 out of 5	NULL	KID59599;	NULL
MAN_07380	65.6001	4.85913	0.970661	5.006	5.55734e-07	1.06895e-06	130.602	160.647	108.289	107.805	9.20968	0	0	8.24797	KID63179.1	426	Extracellular membrane protein, CFEM domain protein, partial	MAN_07380	A0A0B4G426	A0A0B4G426_METAN	unreviewed	Extracellular membrane protein, CFEM domain protein (Fragment)	Metarhizium anisopliae ARSEF 549	426	GO:0016021	integral component of membrane [GO:0016021]	PF05730;	SIGNAL 1 21 {ECO:0000256|SAM:SignalP}.	1 out of 5	NULL	KID63179;	NULL
MAN_09803	6228.77	4.84452	0.0868305	55.7929	0	0	11294.9	11234	13609.1	12016	408.296	435.003	411.073	421.677	KID60668.1	402	tryptophanyl-tRNA synthetase, partial	MAN_09803	A0A0B4ER54	A0A0B4ER54_METAN	unreviewed	Tryptophanyl-tRNA synthetase (Fragment)	Metarhizium anisopliae ARSEF 549	402	GO:0004830; GO:0005524; GO:0005737; GO:0006436	cytoplasm [GO:0005737]; ATP binding [GO:0005524]; tryptophan-tRNA ligase activity [GO:0004830]; tryptophanyl-tRNA aminoacylation [GO:0006436]	PF00579;	NULL	1 out of 5	NULL	KID60668;	K01867
MAN_08124	180.916	4.80503	0.779615	6.16333	7.12305e-10	1.6058e-09	342.092	371.086	339.977	344.282	24.5591	0	17.0862	8.24797	KID62908.1	347	TRI14-like protein, partial	MAN_08124	A0A0B4EXS6	A0A0B4EXS6_METAN	unreviewed	TRI14-like protein (Fragment)	Metarhizium anisopliae ARSEF 549	347	NULL	NULL	NULL	SIGNAL 1 17 {ECO:0000256|SAM:SignalP}.	1 out of 5	NULL	KID62908;	NULL
MAN_07837	1048.2	4.7723	0.204043	23.3887	5.57088e-121	9.98737e-120	2065.19	2180.48	1949.2	1895.29	62.4211	54.7782	123.623	54.6428	KID62621.1	513	cytochrome P450, partial	MAN_07837	A0A0B4F9Z8	A0A0B4F9Z8_METAN	unreviewed	Cytochrome P450 (Fragment)	Metarhizium anisopliae ARSEF 549	513	GO:0004497; GO:0005506; GO:0016705; GO:0020037	heme binding [GO:0020037]; iron ion binding [GO:0005506]; monooxygenase activity [GO:0004497]; oxidoreductase activity, acting on paired donors, with incorporation or reduction of molecular oxygen [GO:0016705]	PF00067;	NULL	1 out of 5	NULL	KID62621;	NULL
MAN_06253	1122.61	4.76423	0.124344	38.3149	0	0	2270.78	2217.12	2054.97	2119.59	69.5842	63.3709	85.4308	100.007	KID65242.1	327	Alcohol dehydrogenase superfamily, zinc-type, partial	MAN_06253	A0A0B4FBY0	A0A0B4FBY0_METAN	unreviewed	Alcohol dehydrogenase superfamily, zinc-type (Fragment)	Metarhizium anisopliae ARSEF 549	327	GO:0016491	oxidoreductase activity [GO:0016491]	PF00107;	NULL	1 out of 5	NULL	KID65242;	NULL
MAN_05246	21.6517	4.76266	0.774857	6.14651	7.92079e-10	1.78248e-09	45.4999	49.7913	44.0711	27.8208	0	0	6.03041	0	KID65587.1	239	hypothetical protein MAN_05246, partial	MAN_05246	A0A0B4FCT9	A0A0B4FCT9_METAN	unreviewed	Uncharacterized protein (Fragment)	Metarhizium anisopliae ARSEF 549	239	NULL	NULL	NULL	NULL	1 out of 5	NULL	KID65587;	NULL
MAN_09801	564.089	4.75321	0.169249	28.0842	1.52978e-173	4.47637e-172	1037.23	1094.47	1241.54	978.074	51.1649	46.1855	35.1774	28.8679	KID60666.1	578	Pyoverdine biosynthesis, partial	MAN_09801	A0A0B4F451	A0A0B4F451_METAN	unreviewed	Pyoverdine biosynthesis (Fragment)	Metarhizium anisopliae ARSEF 549	578	NULL	NULL	PF05141;	NULL	1 out of 5	NULL	KID60666;	NULL
MAN_10869	38.8089	4.72353	0.560819	8.42256	3.68358e-17	1.11075e-16	81.7313	52.6096	80.5871	84.3317	0	0	5.02534	6.18598	KID59165.1	307	hypothetical protein MAN_10869, partial	MAN_10869	A0A0B4EAA6	A0A0B4EAA6_METAN	unreviewed	Uncharacterized protein (Fragment)	Metarhizium anisopliae ARSEF 549	307	GO:0016021	integral component of membrane [GO:0016021]	NULL	NULL	1 out of 5	NULL	KID59165;	NULL
MAN_07878	17.4793	4.70703	0.810507	5.80751	6.34069e-09	1.36708e-08	24.4351	20.6681	45.3302	44.3393	2.04659	0	3.01521	0	KID62662.1	314	Aldolase-type TIM barrel, partial	MAN_07878	A0A0B4F4F9	A0A0B4F4F9_METAN	unreviewed	Aldolase-type TIM barrel (Fragment)	Metarhizium anisopliae ARSEF 549	314	GO:0008152; GO:0016829	lyase activity [GO:0016829]; metabolic process [GO:0008152]	PF00701;	NULL	1 out of 5	NULL	KID62662;	NULL
MAN_01758	1949.23	4.69724	0.0967545	48.548	0	0	3709.93	3587.79	3893.36	3823.62	120.749	158.964	141.715	157.742	KID69244.1	196	Cupin family protein, partial	MAN_01758	A0A0B4GLV5	A0A0B4GLV5_METAN	unreviewed	Cupin family protein (Fragment)	Metarhizium anisopliae ARSEF 549	196	NULL	NULL	PF06172;	SIGNAL 1 22 {ECO:0000256|SAM:SignalP}.	1 out of 5	NULL	KID69244;	K09705
MAN_07984	2284.5	4.6627	0.0964788	48.3287	0	0	4538.2	4658.77	4306.37	4078.35	161.681	171.853	161.816	198.982	KID62768.1	308	myo-inositol oxygenase, partial	MAN_07984	A0A0B4EXF0	A0A0B4EXF0_METAN	unreviewed	Myo-inositol oxygenase (Fragment)	Metarhizium anisopliae ARSEF 549	308	GO:0005506; GO:0005737; GO:0019310; GO:0050113	cytoplasm [GO:0005737]; inositol oxygenase activity [GO:0050113]; iron ion binding [GO:0005506]; inositol catabolic process [GO:0019310]	PF05153;	NULL	1 out of 5	NULL	KID62768;	K00469
MAN_01625	198.104	4.62522	0.289432	15.9804	1.75113e-57	1.38124e-56	406.129	359.812	382.789	374.711	20.4659	9.66674	27.1369	4.12398	KID69111.1	210	isochorismatase family protein, partial	MAN_01625	A0A0B4FTU4	A0A0B4FTU4_METAN	unreviewed	Isochorismatase family protein (Fragment)	Metarhizium anisopliae ARSEF 549	210	GO:0003824; GO:0008152	catalytic activity [GO:0003824]; metabolic process [GO:0008152]	PF00857;	NULL	1 out of 5	NULL	KID69111;	NULL
MAN_05430	2969.75	4.61245	0.0961808	47.956	0	0	5977.34	5562.53	6016.33	5268.56	210.799	235.224	217.095	270.121	KID65771.1	343	hypothetical protein MAN_05430, partial	MAN_05430	A0A0B4FIW0	A0A0B4FIW0_METAN	unreviewed	Uncharacterized protein (Fragment)	Metarhizium anisopliae ARSEF 549	343	NULL	NULL	NULL	SIGNAL 1 18 {ECO:0000256|SAM:SignalP}.	1 out of 5	NULL	KID65771;	NULL
MAN_03647	859.451	4.60802	0.127167	36.236	1.64995e-287	1.2354e-285	1679.28	1589.56	1769.14	1566.66	60.3746	69.8154	58.294	82.4797	KID68791.1	540	Major facilitator superfamily domain, general substrate transporter, partial	MAN_03647	A0A0B4FSV6	A0A0B4FSV6_METAN	unreviewed	Major facilitator superfamily domain, general substrate transporter (Fragment)	Metarhizium anisopliae ARSEF 549	540	GO:0016021; GO:0055085	integral component of membrane [GO:0016021]; transmembrane transport [GO:0055085]	PF07690;	NULL	1 out of 5	NULL	KID68791;	NULL
MAN_09734	590.944	4.59109	0.182262	25.1895	5.22724e-140	1.14471e-138	1123.17	1128.29	1070.3	1218.03	36.8387	30.0743	71.3599	49.4878	KID60599.1	394	agmatinase, partial	MAN_09734	A0A0B4FWI3	A0A0B4FWI3_METAN	unreviewed	Agmatinase (Fragment)	Metarhizium anisopliae ARSEF 549	394	GO:0016813; GO:0046872	hydrolase activity, acting on carbon-nitrogen (but not peptide) bonds, in linear amidines [GO:0016813]; metal ion binding [GO:0046872]	PF00491;	SIGNAL 1 22 {ECO:0000256|SAM:SignalP}.	1 out of 5	NULL	KID60599;	K01480
MAN_00131	1796.88	4.57351	0.130113	35.1504	1.14546e-270	7.52528e-269	3458.84	3698.65	2887.28	3750.59	166.797	155.742	142.72	114.441	KID70532.1	271	hypothetical protein MAN_00131, partial	MAN_00131	A0A0B4FS41	A0A0B4FS41_METAN	unreviewed	Uncharacterized protein (Fragment)	Metarhizium anisopliae ARSEF 549	271	GO:0016021	integral component of membrane [GO:0016021]	PF01988;	NULL	1 out of 5	NULL	KID70532;	NULL
MAN_07669	136.761	4.57111	0.344853	13.2552	4.20893e-40	2.35751e-39	267.944	307.203	256.871	218.219	5.11649	3.22225	22.1115	13.4029	KID63468.1	580	glucose-methanol-choline oxidoreductase, partial	MAN_07669	A0A0B4EZC3	A0A0B4EZC3_METAN	unreviewed	Glucose-methanol-choline oxidoreductase (Fragment)	Metarhizium anisopliae ARSEF 549	580	GO:0016614; GO:0050660	flavin adenine dinucleotide binding [GO:0050660]; oxidoreductase activity, acting on CH-OH group of donors [GO:0016614]	PF05199;PF00732;	NULL	1 out of 5	NULL	KID63468;	NULL
MAN_00808	1775.01	4.56696	0.190218	24.0091	2.23237e-127	4.22532e-126	3195.95	3067.33	3781.3	3581.05	220.009	111.705	141.715	101.038	KID71209.1	252	hypothetical protein MAN_00808, partial	MAN_00808	A0A0B4GT10	A0A0B4GT10_METAN	unreviewed	Uncharacterized protein (Fragment)	Metarhizium anisopliae ARSEF 549	252	GO:0016021	integral component of membrane [GO:0016021]	NULL	NULL	1 out of 5	NULL	KID71209;	NULL
MAN_10527	27.984	4.52747	0.575107	7.87239	3.47941e-15	9.75519e-15	51.3981	62.9437	54.1444	46.0781	3.06989	3.22225	3.01521	0	KID59586.1	341	Acyl-CoA oxidase/dehydrogenase, central domain protein, partial	MAN_10527	A0A0B4F1A0	A0A0B4F1A0_METAN	unreviewed	Acyl-CoA oxidase/dehydrogenase, central domain protein (Fragment)	Metarhizium anisopliae ARSEF 549	341	GO:0016627	oxidoreductase activity, acting on the CH-CH group of donors [GO:0016627]	NULL	NULL	1 out of 5	NULL	KID59586;	NULL
MAN_07357	5817.65	4.52364	0.130616	34.6332	8.00004e-263	4.93723e-261	11756.7	11319.5	10997.6	10528.4	364.294	444.67	519.621	610.35	KID63156.1	528	Amine oxidase, partial	MAN_07357	A0A0B4FBK3	A0A0B4FBK3_METAN	unreviewed	Amine oxidase (Fragment)	Metarhizium anisopliae ARSEF 549	528	GO:0016491	oxidoreductase activity [GO:0016491]	PF01593;	SIGNAL 1 22 {ECO:0000256|SAM:SignalP}.	1 out of 5	NULL	KID63156;	K13366
MAN_10537	61.329	4.51041	0.417752	10.7969	3.56107e-27	1.4616e-26	139.028	137.161	89.4013	104.328	9.20968	5.37041	2.01014	4.12398	KID59596.1	409	hypothetical protein MAN_10537, partial	MAN_10537	A0A0B4F1A9	A0A0B4F1A9_METAN	unreviewed	Uncharacterized protein (Fragment)	Metarhizium anisopliae ARSEF 549	409	NULL	NULL	NULL	NULL	1 out of 5	NULL	KID59596;	NULL
MAN_10656	587.956	4.45963	0.218546	20.4059	1.48256e-92	1.90377e-91	1116.43	1069.1	1155.92	1157.17	63.4444	78.408	29.147	34.0229	KID59486.1	150	hypothetical protein MAN_10656, partial	MAN_10656	A0A0B4F0W9	A0A0B4F0W9_METAN	unreviewed	Uncharacterized protein (Fragment)	Metarhizium anisopliae ARSEF 549	150	NULL	NULL	NULL	SIGNAL 1 19 {ECO:0000256|SAM:SignalP}.	1 out of 5	NULL	KID59486;	NULL
MAN_09804	5071.21	4.45789	0.106658	41.7961	0	0	9349.39	9298.75	10429.7	9725.09	393.97	540.263	382.931	449.514	KID60669.1	338	quinoprotein amine dehydrogenase beta chain-like protein, partial	MAN_09804	A0A0B4FWN1	A0A0B4FWN1_METAN	unreviewed	Quinoprotein amine dehydrogenase beta chain-like protein (Fragment)	Metarhizium anisopliae ARSEF 549	338	NULL	NULL	NULL	SIGNAL 1 17 {ECO:0000256|SAM:SignalP}.	1 out of 5	NULL	KID60669;	NULL
MAN_03668	1070.26	4.43216	0.115392	38.4097	0	0	2195.79	2070.57	2058.75	1857.91	108.47	93.4452	86.4359	90.7277	KID68812.1	540	amidohydrolase family protein, partial	MAN_03668	A0A0B4FLU8	A0A0B4FLU8_METAN	unreviewed	Amidohydrolase family protein (Fragment)	Metarhizium anisopliae ARSEF 549	540	GO:0016810	hydrolase activity, acting on carbon-nitrogen (but not peptide) bonds [GO:0016810]	PF07969;	NULL	1 out of 5	NULL	KID68812;	NULL
MAN_05884	1102.37	4.42433	0.144662	30.5839	2.00365e-205	7.75785e-204	2218.54	2313.88	1898.83	1994.4	96.19	132.112	77.3903	87.6347	KID64873.1	160	hypothetical protein MAN_05884, partial	MAN_05884	A0A0B4F2Z6	A0A0B4F2Z6_METAN	unreviewed	Uncharacterized protein (Fragment)	Metarhizium anisopliae ARSEF 549	160	GO:0016021	integral component of membrane [GO:0016021]	PF08592;	NULL	1 out of 5	NULL	KID64873;	NULL
MAN_10866	66.5623	4.41904	0.3784	11.6782	1.64709e-31	7.5381e-31	118.805	124.008	137.25	128.671	9.20968	7.51858	7.03548	0	KID59172.1	356	Ankyrin repeat-containing domain protein, partial	MAN_10866	A0A0B4ETS8	A0A0B4ETS8_METAN	unreviewed	Ankyrin repeat-containing domain protein (Fragment)	Metarhizium anisopliae ARSEF 549	356	NULL	NULL	PF12796;	NULL	1 out of 5	NULL	KID59172;	NULL
MAN_09799	4590.84	4.37395	0.0857259	51.0225	0	0	8374.51	8604.5	9408.54	8649.65	478.903	403.855	377.906	428.894	KID60664.1	457	FAD dependent oxidoreductase, partial	MAN_09799	A0A0B4FWM6	A0A0B4FWM6_METAN	unreviewed	FAD dependent oxidoreductase (Fragment)	Metarhizium anisopliae ARSEF 549	457	GO:0016491	oxidoreductase activity [GO:0016491]	PF01266;	NULL	1 out of 5	NULL	KID60664;	NULL
MAN_09205	1988.17	4.35554	0.0837014	52.0366	0	0	3737.73	3794.47	3982.76	3649.74	194.427	186.89	179.907	179.393	KID61440.1	218	Cerato-platanin, partial	MAN_09205	A0A0B4EH37	A0A0B4EH37_METAN	unreviewed	Cerato-platanin (Fragment)	Metarhizium anisopliae ARSEF 549	218	NULL	NULL	NULL	SIGNAL 1 18 {ECO:0000256|SAM:SignalP}.	1 out of 5	NULL	KID61440;	NULL
MAN_10400	277.667	4.34881	0.263092	16.5296	2.24499e-61	1.89873e-60	529.147	529.854	504.928	552.938	14.3262	50.4819	21.1064	18.5579	KID59759.1	1388	ABC transporter, transmembrane domain, type 1, partial	MAN_10400	A0A0B4FU45	A0A0B4FU45_METAN	unreviewed	ABC transporter, transmembrane domain, type 1 (Fragment)	Metarhizium anisopliae ARSEF 549	1388	GO:0000770; GO:0005524; GO:0016021; GO:0042626	integral component of membrane [GO:0016021]; ATP binding [GO:0005524]; ATPase activity, coupled to transmembrane movement of substances [GO:0042626]; peptide pheromone export [GO:0000770]	PF00664;PF00005;	NULL	1 out of 5	NULL	KID59759;	NULL
MAN_04595	106.99	4.33977	0.281526	15.4152	1.29375e-53	9.55351e-53	204.75	218.894	198.949	193.007	12.2796	9.66674	7.03548	11.341	KID66314.1	301	hypothetical protein MAN_04595, partial	MAN_04595	A0A0B4GDH1	A0A0B4GDH1_METAN	unreviewed	Uncharacterized protein (Fragment)	Metarhizium anisopliae ARSEF 549	301	GO:0016021	integral component of membrane [GO:0016021]	NULL	SIGNAL 1 27 {ECO:0000256|SAM:SignalP}.	1 out of 5	NULL	KID66314;	NULL
MAN_06390	35.567	4.3396	0.552779	7.85051	4.14337e-15	1.15912e-14	64.8795	67.641	71.7729	66.9437	0	0	4.02027	9.27896	KID64216.1	425	TRI7-like toxin biosynthesis protein, partial	MAN_06390	A0A0B4FEF0	A0A0B4FEF0_METAN	unreviewed	TRI7-like toxin biosynthesis protein (Fragment)	Metarhizium anisopliae ARSEF 549	425	GO:0016021	integral component of membrane [GO:0016021]	PF13813;	NULL	1 out of 5	NULL	KID64216;	NULL
MAN_06065	1757.06	4.33734	0.102515	42.3095	0	0	3544.78	3114.3	3494.21	3240.25	145.308	177.224	152.77	187.641	KID65054.1	653	calcium- spray protein, partial	MAN_06065	A0A0B4G9N7	A0A0B4G9N7_METAN	unreviewed	Calcium-spray protein (Fragment)	Metarhizium anisopliae ARSEF 549	653	GO:0016021	integral component of membrane [GO:0016021]	PF06011;PF14558;	SIGNAL 1 23 {ECO:0000256|SAM:SignalP}.	1 out of 5	NULL	KID65054;	NULL
MAN_01080	996.654	4.33564	0.11926	36.3545	2.2291e-289	1.69395e-287	1879.82	1895.83	2096.52	1724.89	98.2366	102.038	95.4815	80.4177	KID71481.1	521	beta-1,3-glucanosyltransferase, partial	MAN_01080	A0A0B4G0J5	A0A0B4G0J5_METAN	unreviewed	1,3-beta-glucanosyltransferase (EC 2.4.1.-) (Fragment)	Metarhizium anisopliae ARSEF 549	521	GO:0005886; GO:0016021; GO:0016740; GO:0031225	anchored component of membrane [GO:0031225]; integral component of membrane [GO:0016021]; plasma membrane [GO:0005886]; transferase activity [GO:0016740]	PF03198;PF07983;	SIGNAL 1 19 {ECO:0000256|RuleBase:RU361209}.	2 out of 5	NULL	KID71481;	NULL
MAN_04674	21.6766	4.32548	0.638873	6.77048	1.28352e-11	3.10454e-11	40.4444	40.3967	45.3302	39.1229	0	0	5.02534	3.09299	KID66393.1	314	hypothetical protein MAN_04674, partial	MAN_04674	A0A0B4F7B4	A0A0B4F7B4_METAN	unreviewed	Uncharacterized protein (Fragment)	Metarhizium anisopliae ARSEF 549	314	GO:0016021	integral component of membrane [GO:0016021]	NULL	NULL	1 out of 5	NULL	KID66393;	NULL
MAN_10867	59.5398	4.318	0.391471	11.0302	2.73301e-28	1.15622e-27	110.379	109.917	124.658	108.675	9.20968	6.44449	7.03548	0	KID59173.1	346	Ankyrin repeat-containing domain protein, partial	MAN_10867	A0A0B4ELM4	A0A0B4ELM4_METAN	unreviewed	Ankyrin repeat-containing domain protein (Fragment)	Metarhizium anisopliae ARSEF 549	346	NULL	NULL	PF12796;	NULL	1 out of 5	NULL	KID59173;	NULL
MAN_03067	508.668	4.30768	0.173196	24.8717	1.50622e-136	3.13017e-135	1001.84	921.608	997.265	953.73	56.2814	24.7039	60.3041	53.6118	KID68211.1	174	Membrane associated eicosanoid/glutathione metabolism-like domain protein, partial	MAN_03067	A0A0B4FR27	A0A0B4FR27_METAN	unreviewed	Membrane associated eicosanoid/glutathione metabolism-like domain protein (Fragment)	Metarhizium anisopliae ARSEF 549	174	GO:0016021	integral component of membrane [GO:0016021]	PF01124;	NULL	1 out of 5	NULL	KID68211;	NULL
MAN_06409	1871.4	4.28118	0.0831109	51.5117	0	0	3633.25	3471.3	3620.12	3514.11	167.821	191.187	193.978	179.393	KID64235.1	214	Outer membrane protein, beta-barrel, partial	MAN_06409	A0A0B4EQB8	A0A0B4EQB8_METAN	unreviewed	Outer membrane protein, beta-barrel (Fragment)	Metarhizium anisopliae ARSEF 549	214	GO:0016021	integral component of membrane [GO:0016021]	PF11578;	NULL	1 out of 5	NULL	KID64235;	NULL
MAN_00022	73.8319	4.27725	0.385338	11.1	1.25432e-28	5.34871e-28	168.518	125.887	149.842	117.369	0	10.7408	10.0507	8.24797	KID70423.1	583	Cytochrome P450, partial	MAN_00022	A0A0B4FJ13	A0A0B4FJ13_METAN	unreviewed	Cytochrome P450 (Fragment)	Metarhizium anisopliae ARSEF 549	583	GO:0005506; GO:0016021; GO:0016705; GO:0020037	integral component of membrane [GO:0016021]; heme binding [GO:0020037]; iron ion binding [GO:0005506]; oxidoreductase activity, acting on paired donors, with incorporation or reduction of molecular oxygen [GO:0016705]	PF00067;	NULL	1 out of 5	NULL	KID70423;	K10437
MAN_00993	295.907	4.27371	0.490452	8.71383	2.9377e-18	9.20167e-18	504.712	553.341	606.921	585.975	54.2348	24.7039	30.1521	7.21697	KID71394.1	335	hypothetical protein MAN_00993, partial	MAN_00993	A0A0B4GTN1	A0A0B4GTN1_METAN	unreviewed	Uncharacterized protein (Fragment)	Metarhizium anisopliae ARSEF 549	335	GO:0016021	integral component of membrane [GO:0016021]	NULL	NULL	1 out of 5	NULL	KID71394;	NULL
MAN_09811	91.5255	4.27281	0.328009	13.0265	8.6488e-39	4.69711e-38	155.879	172.86	171.248	196.484	12.2796	3.22225	15.076	5.15498	KID60676.1	173	AtmB protein, partial	MAN_09811	A0A0B4F461	A0A0B4F461_METAN	unreviewed	AtmB protein (Fragment)	Metarhizium anisopliae ARSEF 549	173	GO:0016021	integral component of membrane [GO:0016021]	NULL	NULL	1 out of 5	NULL	KID60676;	NULL
MAN_06066	6242.49	4.24544	0.0719103	59.038	0	0	12138.4	11157	12377.7	11766.4	586.349	603.634	678.421	632.001	KID65055.1	472	Mannan endo-1,6-alpha-mannosidase, partial	MAN_06066	A0A0B4ET23	A0A0B4ET23_METAN	unreviewed	Mannan endo-1,6-alpha-mannosidase (Fragment)	Metarhizium anisopliae ARSEF 549	472	GO:0008496; GO:0016021; GO:0016052	integral component of membrane [GO:0016021]; mannan endo-1,6-alpha-mannosidase activity [GO:0008496]; carbohydrate catabolic process [GO:0016052]	PF03663;	SIGNAL 1 29 {ECO:0000256|SAM:SignalP}.	1 out of 5	NULL	KID65055;	K08257
MAN_02719	38.5983	4.24238	0.495779	8.55699	1.15848e-17	3.55863e-17	61.5092	69.5199	80.5871	81.7235	9.20968	3.22225	3.01521	0	KID70205.1	229	hypothetical protein MAN_02719, partial	MAN_02719	A0A0B4F7Y3	A0A0B4F7Y3_METAN	unreviewed	Uncharacterized protein (Fragment)	Metarhizium anisopliae ARSEF 549	229	NULL	NULL	NULL	SIGNAL 1 16 {ECO:0000256|SAM:SignalP}.	1 out of 5	NULL	KID70205;	NULL
MAN_03631	1211.13	4.24216	0.0960863	44.1494	0	0	2389.59	2321.4	2242.59	2249.13	132.005	121.371	120.608	112.379	KID68775.1	257	mitochondrial triosephosphate isomerase, partial	MAN_03631	A0A0B4F3Q5	A0A0B4F3Q5_METAN	unreviewed	Triosephosphate isomerase (EC 5.3.1.1) (Fragment)	Metarhizium anisopliae ARSEF 549	257	GO:0004807; GO:0006094; GO:0006096; GO:0006098	triose-phosphate isomerase activity [GO:0004807]; gluconeogenesis [GO:0006094]; glycolytic process [GO:0006096]; pentose-phosphate shunt [GO:0006098]	PF00121;	NULL	2 out of 5	NULL	KID68775;	K01803
MAN_07136	275.307	4.23158	0.21543	19.6425	6.69632e-86	7.90135e-85	559.481	490.397	434.415	606.84	30.6989	19.3335	22.1115	39.1779	KID63965.1	569	MSF membrane transporter, partial	MAN_07136	A0A0B4EPK4	A0A0B4EPK4_METAN	unreviewed	MSF membrane transporter (Fragment)	Metarhizium anisopliae ARSEF 549	569	GO:0016021; GO:0055085	integral component of membrane [GO:0016021]; transmembrane transport [GO:0055085]	PF07690;	NULL	1 out of 5	NULL	KID63965;	NULL
MAN_10538	12.6407	4.22915	0.867427	4.87551	1.08526e-06	2.04765e-06	19.3796	25.3654	22.6651	28.6902	0	0	5.02534	0	KID59597.1	421	F-box domain, cyclin-like protein, partial	MAN_10538	A0A0B4EV56	A0A0B4EV56_METAN	unreviewed	F-box domain, cyclin-like protein (Fragment)	Metarhizium anisopliae ARSEF 549	421	NULL	NULL	NULL	NULL	1 out of 5	NULL	KID59597;	NULL
MAN_06309	668.301	4.22812	0.161839	26.1255	1.87124e-150	4.5261e-149	1233.55	1404.49	1197.47	1240.63	64.4677	52.63	97.4917	55.6738	KID65298.1	916	subtilisin-like serine protease PR1C, partial	MAN_06309	A0A0B4F481	A0A0B4F481_METAN	unreviewed	Subtilisin-like serine protease PR1C (Fragment)	Metarhizium anisopliae ARSEF 549	916	GO:0004252; GO:0005618; GO:0016020	cell wall [GO:0005618]; membrane [GO:0016020]; serine-type endopeptidase activity [GO:0004252]	PF06280;PF00082;	SIGNAL 1 21 {ECO:0000256|SAM:SignalP}.	1 out of 5	NULL	KID65298;	NULL
MAN_08384	9367.99	4.20554	0.249865	16.8312	1.44093e-63	1.2541e-62	17825	17728.5	18171.1	17366.2	1456.15	808.784	864.359	723.759	KID62380.1	573	Pyruvate decarboxylase/indolepyruvate decarboxylase, partial	MAN_08384	A0A0B4EJS2	A0A0B4EJS2_METAN	unreviewed	Pyruvate decarboxylase/indolepyruvate decarboxylase (Fragment)	Metarhizium anisopliae ARSEF 549	573	GO:0000287; GO:0016831; GO:0030976	carboxy-lyase activity [GO:0016831]; magnesium ion binding [GO:0000287]; thiamine pyrophosphate binding [GO:0030976]	PF02775;PF00205;PF02776;	NULL	1 out of 5	NULL	KID62380;	K01568
MAN_08210	3172.82	4.2017	0.104072	40.3729	0	0	5668.11	5451.67	6598.07	6357.04	366.34	280.335	315.592	345.384	KID62206.1	1107	ATPase, P-type, transmembrane domain protein, partial	MAN_08210	A0A0B4F8Q7	A0A0B4F8Q7_METAN	unreviewed	ATPase, P-type, transmembrane domain protein (Fragment)	Metarhizium anisopliae ARSEF 549	1107	GO:0005524; GO:0016021; GO:0016787	integral component of membrane [GO:0016021]; ATP binding [GO:0005524]; hydrolase activity [GO:0016787]	PF00689;PF00690;	NULL	1 out of 5	NULL	KID62206;	K01539
MAN_08584	5028.58	4.1914	0.13031	32.1647	5.49875e-227	2.61653e-225	10588.8	10557.6	8251.36	8743.54	630.351	414.596	521.631	520.653	KID61905.1	71	pyruvate dehydrogenase kinase, partial	MAN_08584	A0A0B4EIG1	A0A0B4EIG1_METAN	unreviewed	Pyruvate dehydrogenase kinase (Fragment)	Metarhizium anisopliae ARSEF 549	71	GO:0016301	kinase activity [GO:0016301]	PF05922;	NULL	1 out of 5	NULL	KID61905;	NULL
MAN_04806	2274.82	4.18483	0.141205	29.6367	5.03852e-193	1.74514e-191	4396.64	4435.18	4461.25	3957.5	324.385	196.557	230.161	196.92	KID66525.1	422	acid phosphatase, partial	MAN_04806	A0A0B4EXA8	A0A0B4EXA8_METAN	unreviewed	Acid phosphatase (Fragment)	Metarhizium anisopliae ARSEF 549	422	GO:0008152; GO:0016788	hydrolase activity, acting on ester bonds [GO:0016788]; metabolic process [GO:0008152]	PF04185;	SIGNAL 1 18 {ECO:0000256|SAM:SignalP}.	1 out of 5	NULL	KID66525;	NULL
MAN_07267	24.6554	4.16683	0.750946	5.54878	2.87671e-08	5.96245e-08	42.9722	16.9102	50.3669	76.5071	5.11649	5.37041	0	0	KID63066.1	407	acetolactate synthase, partial	MAN_07267	A0A0B4FBE7	A0A0B4FBE7_METAN	unreviewed	Acetolactate synthase (Fragment)	Metarhizium anisopliae ARSEF 549	407	GO:0000287; GO:0003824; GO:0030976	catalytic activity [GO:0003824]; magnesium ion binding [GO:0000287]; thiamine pyrophosphate binding [GO:0030976]	PF02775;PF00205;PF02776;	NULL	1 out of 5	NULL	KID63066;	NULL
MAN_07121	3764.96	4.15829	0.290194	14.3293	1.43483e-46	9.24155e-46	7136.75	7264.83	7490.82	6630.03	659.004	283.558	360.82	293.834	KID63950.1	708	peroxisomal copper amine oxidase, partial	MAN_07121	A0A0B4EPI4	A0A0B4EPI4_METAN	unreviewed	Amine oxidase (EC 1.4.3.-) (Fragment)	Metarhizium anisopliae ARSEF 549	708	GO:0005507; GO:0008131; GO:0009308; GO:0048038	copper ion binding [GO:0005507]; primary amine oxidase activity [GO:0008131]; quinone binding [GO:0048038]; amine metabolic process [GO:0009308]	PF01179;PF02727;PF02728;	NULL	2 out of 5	NULL	KID63950;	K00276
MAN_04017	9760.02	4.1562	0.0701246	59.2688	0	0	19004.6	18972.4	17931.9	18024.4	1136.88	1050.45	1014.11	945.423	KID67259.1	852	carnitine acetyl transferase, partial	MAN_04017	A0A0B4GG74	A0A0B4GG74_METAN	unreviewed	Carnitine acetyl transferase (Fragment)	Metarhizium anisopliae ARSEF 549	852	GO:0016746	transferase activity, transferring acyl groups [GO:0016746]	PF00755;	NULL	1 out of 5	NULL	KID67259;	K00624
MAN_04581	7.30739	4.15612	1.08133	3.84351	0.000121285	0.000199619	8.42591	18.7892	15.1101	13.041	0	0	0	3.09299	KID66300.1	417	Cytochrome P450, partial	MAN_04581	A0A0B4EWI6	A0A0B4EWI6_METAN	unreviewed	Cytochrome P450 (Fragment)	Metarhizium anisopliae ARSEF 549	417	GO:0005506; GO:0016705; GO:0020037	heme binding [GO:0020037]; iron ion binding [GO:0005506]; oxidoreductase activity, acting on paired donors, with incorporation or reduction of molecular oxygen [GO:0016705]	PF00067;	NULL	1 out of 5	NULL	KID66300;	NULL
MAN_08569	4391.1	4.13509	0.0775256	53.3384	0	0	8159.65	8745.41	8421.35	7911.53	476.857	453.263	524.646	436.111	KID61890.1	1091	NADPH-P450 reductase, partial	MAN_08569	A0A0B4EIE5	A0A0B4EIE5_METAN	unreviewed	NADPH-P450 reductase (Fragment)	Metarhizium anisopliae ARSEF 549	1091	GO:0003958; GO:0005506; GO:0010181; GO:0020037; GO:0070330	aromatase activity [GO:0070330]; FMN binding [GO:0010181]; heme binding [GO:0020037]; iron ion binding [GO:0005506]; NADPH-hemoprotein reductase activity [GO:0003958]	PF00667;PF00258;PF00175;PF00067;	NULL	1 out of 5	NULL	KID61890;	K14338
MAN_04103	935.941	4.13109	0.16862	24.4993	1.50093e-132	2.97353e-131	1706.25	1614.93	1886.24	1875.29	93.1201	125.668	62.3143	123.72	KID67345.1	337	hypothetical protein MAN_04103, partial	MAN_04103	A0A0B4EZH6	A0A0B4EZH6_METAN	unreviewed	Uncharacterized protein (Fragment)	Metarhizium anisopliae ARSEF 549	337	GO:0016021	integral component of membrane [GO:0016021]	NULL	NULL	1 out of 5	NULL	KID67345;	NULL
MAN_05576	2383.51	4.12349	0.292504	14.0972	3.95062e-45	2.46653e-44	4814.57	4778.08	4317.7	4122.69	235.358	386.67	136.689	276.307	KID65917.1	102	hydrophobin, partial	MAN_05576	A0A0B4FDG5	A0A0B4FDG5_METAN	unreviewed	Hydrophobin (Fragment)	Metarhizium anisopliae ARSEF 549	102	GO:0005199; GO:0009277	fungal-type cell wall [GO:0009277]; structural constituent of cell wall [GO:0005199]	PF01185;	SIGNAL 1 18 {ECO:0000256|SAM:SignalP}.	1 out of 5	NULL	KID65917;	NULL
MAN_01652	149.152	4.11681	0.232997	17.6689	7.27395e-70	6.87112e-69	273	306.263	288.351	260.82	17.3961	10.7408	18.0912	18.5579	KID69138.1	129	hypothetical protein MAN_01652, partial	MAN_01652	A0A0B4FFB5	A0A0B4FFB5_METAN	unreviewed	Uncharacterized protein (Fragment)	Metarhizium anisopliae ARSEF 549	129	GO:0016021	integral component of membrane [GO:0016021]	PF08592;	NULL	1 out of 5	NULL	KID69138;	NULL
MAN_10567	70.3948	4.10612	0.333216	12.3227	6.83622e-35	3.38916e-34	154.194	129.645	125.917	122.585	9.20968	5.37041	10.0507	6.18598	KID59626.1	300	RTA-like protein, partial	MAN_10567	A0A0B4F1D7	A0A0B4F1D7_METAN	unreviewed	RTA-like protein (Fragment)	Metarhizium anisopliae ARSEF 549	300	GO:0006950; GO:0016021	integral component of membrane [GO:0016021]; response to stress [GO:0006950]	PF04479;	NULL	1 out of 5	NULL	KID59626;	NULL
MAN_06286	3757.91	4.08838	0.0851087	48.0372	0	0	7249.65	7015.87	6999.74	7129.94	421.599	361.966	481.428	403.119	KID65275.1	523	cytochrome P450 52A12, partial	MAN_06286	A0A0B4ETL7	A0A0B4ETL7_METAN	unreviewed	Cytochrome P450 52A12 (Fragment)	Metarhizium anisopliae ARSEF 549	523	GO:0005506; GO:0016712; GO:0020037	heme binding [GO:0020037]; iron ion binding [GO:0005506]; oxidoreductase activity, acting on paired donors, with incorporation or reduction of molecular oxygen, reduced flavin or flavoprotein as one donor, and incorporation of one atom of oxygen [GO:0016712]	PF00067;	NULL	1 out of 5	NULL	KID65275;	NULL
MAN_07620	11.4429	4.08282	0.899513	4.53892	5.65436e-06	1.0269e-05	25.2777	18.7892	16.3692	26.082	0	0	5.02534	0	KID63419.1	509	FAD/FMN-dependent dehydrogenase, partial	MAN_07620	A0A0B4G4Q5	A0A0B4G4Q5_METAN	unreviewed	FAD/FMN-dependent dehydrogenase (Fragment)	Metarhizium anisopliae ARSEF 549	509	GO:0016614; GO:0050660	flavin adenine dinucleotide binding [GO:0050660]; oxidoreductase activity, acting on CH-OH group of donors [GO:0016614]	PF01565;	NULL	1 out of 5	NULL	KID63419;	NULL

## Sheet: Log2FC < -4, padjust< 0.001
ManiH_Mani_H5	Protein product	Length	Protein name	Gene names	Entry	Entry name	Status	Protein names	Organism	Length2	Gene ontology IDs	Gene ontology (GO)	Cross-reference (Pfam)	Signal peptide	Annotation	Cross-reference (KEGG)	EnsemblFungi transcript	KEGG_ENZYME
3927.06	KID61607.1	205	protein bli-3, partial	MAN_08846	A0A0B4F188	A0A0B4F188_METAN	unreviewed	Protein bli-3 (Fragment)	Metarhizium anisopliae ARSEF 549	205	GO:0048037	cofactor binding [GO:0048037]	NULL	NULL	1 out of 5	NULL	KID61607;	NULL
12329.7	KID63949.1	331	myb family transcription factor, partial	MAN_07120	A0A0B4G6B4	A0A0B4G6B4_METAN	unreviewed	Myb family transcription factor (Fragment)	Metarhizium anisopliae ARSEF 549	331	NULL	NULL	NULL	NULL	1 out of 5	NULL	KID63949;	NULL
406.212	KID66090.1	357	C6 transcription factor GliZ2, partial	MAN_05749	A0A0B4EW07	A0A0B4EW07_METAN	unreviewed	C6 transcription factor GliZ2 (Fragment)	Metarhizium anisopliae ARSEF 549	357	GO:0000981; GO:0005634; GO:0008270	nucleus [GO:0005634]; RNA polymerase II transcription factor activity, sequence-specific DNA binding [GO:0000981]; zinc ion binding [GO:0008270]	PF00172;	NULL	1 out of 5	NULL	KID66090;	NULL
0	KID69485.1	372	transcription factor RfeF, partial	MAN_01999	A0A0B4F5W6	A0A0B4F5W6_METAN	unreviewed	Transcription factor RfeF (Fragment)	Metarhizium anisopliae ARSEF 549	372	NULL	NULL	NULL	NULL	1 out of 5	NULL	KID69485;	NULL
29.8989	KID59240.1	785	Transcription factor, fungi, partial	MAN_10836	A0A0B4EAH3	A0A0B4EAH3_METAN	unreviewed	Transcription factor, fungi (Fragment)	Metarhizium anisopliae ARSEF 549	785	GO:0000981; GO:0003677; GO:0005634; GO:0006351; GO:0008270	nucleus [GO:0005634]; DNA binding [GO:0003677]; RNA polymerase II transcription factor activity, sequence-specific DNA binding [GO:0000981]; zinc ion binding [GO:0008270]; transcription, DNA-templated [GO:0006351]	PF04082;PF00172;	NULL	1 out of 5	NULL	KID59240;	NULL
601.071	KID66034.1	482	Transcription factor, fungi, partial	MAN_05693	A0A0B4GCQ6	A0A0B4GCQ6_METAN	unreviewed	Transcription factor, fungi (Fragment)	Metarhizium anisopliae ARSEF 549	482	GO:0003677; GO:0005634; GO:0006351; GO:0008270	nucleus [GO:0005634]; DNA binding [GO:0003677]; zinc ion binding [GO:0008270]; transcription, DNA-templated [GO:0006351]	PF04082;	NULL	1 out of 5	NULL	KID66034;	NULL
379.407	KID61538.1	331	Rho guanyl nucleotide exchange factor, partial	MAN_08777	A0A0B4EU15	A0A0B4EU15_METAN	unreviewed	Rho guanyl nucleotide exchange factor (Fragment)	Metarhizium anisopliae ARSEF 549	331	GO:0005089; GO:0035023	Rho guanyl-nucleotide exchange factor activity [GO:0005089]; regulation of Rho protein signal transduction [GO:0035023]	PF00621;	NULL	1 out of 5	NULL	KID61538;	K11236
654.683	KID66092.1	364	Peptidase M19, renal dipeptidase, partial	MAN_05751	A0A0B4FDZ7	A0A0B4FDZ7_METAN	unreviewed	Dipeptidase (EC 3.4.13.19) (Fragment)	Metarhizium anisopliae ARSEF 549	364	GO:0008237; GO:0016805; GO:0046872	dipeptidase activity [GO:0016805]; metal ion binding [GO:0046872]; metallopeptidase activity [GO:0008237]	PF01244;	NULL	2 out of 5	NULL	KID66092;	K01273
256.718	KID61461.1	340	Intradiol ring-cleavage dioxygenase, core, partial	MAN_09226	A0A0B4F6H9	A0A0B4F6H9_METAN	unreviewed	Intradiol ring-cleavage dioxygenase, core (Fragment)	Metarhizium anisopliae ARSEF 549	340	GO:0006725; GO:0008199; GO:0016702	ferric iron binding [GO:0008199]; oxidoreductase activity, acting on single donors with incorporation of molecular oxygen, incorporation of two atoms of oxygen [GO:0016702]; cellular aromatic compound metabolic process [GO:0006725]	PF00775;	SIGNAL 1 18 {ECO:0000256|SAM:SignalP}.	1 out of 5	NULL	KID61461;	NULL
194.858	KID69419.1	93	hypothetical protein MAN_01933, partial	MAN_01933	A0A0B4GMH4	A0A0B4GMH4_METAN	unreviewed	Uncharacterized protein (Fragment)	Metarhizium anisopliae ARSEF 549	93	NULL	NULL	NULL	SIGNAL 1 17 {ECO:0000256|SAM:SignalP}.	1 out of 5	NULL	KID69419;	NULL
231.974	KID70841.1	944	2OG-Fe(II) oxygenase superfamily protein, partial	MAN_00440	A0A0B4FYT6	A0A0B4FYT6_METAN	unreviewed	2OG-Fe(II) oxygenase superfamily protein (Fragment)	Metarhizium anisopliae ARSEF 549	944	NULL	NULL	NULL	NULL	1 out of 5	NULL	KID70841;	NULL
237.129	KID66100.1	522	hypothetical protein MAN_05759, partial	MAN_05759	A0A0B4EW16	A0A0B4EW16_METAN	unreviewed	Uncharacterized protein (Fragment)	Metarhizium anisopliae ARSEF 549	522	NULL	NULL	NULL	NULL	1 out of 5	NULL	KID66100;	NULL
188.672	KID65578.1	214	hypothetical protein MAN_05237, partial	MAN_05237	A0A0B4F554	A0A0B4F554_METAN	unreviewed	Uncharacterized protein (Fragment)	Metarhizium anisopliae ARSEF 549	214	NULL	NULL	NULL	SIGNAL 1 24 {ECO:0000256|SAM:SignalP}.	1 out of 5	NULL	KID65578;	NULL
183.517	KID66039.1	284	methyltransferase domain-containing protein, partial	MAN_05698	A0A0B4GCR1	A0A0B4GCR1_METAN	unreviewed	Methyltransferase domain-containing protein (Fragment)	Metarhizium anisopliae ARSEF 549	284	GO:0008168	methyltransferase activity [GO:0008168]	NULL	NULL	1 out of 5	NULL	KID66039;	NULL
177.331	KID66091.1	260	methyltransferase, partial	MAN_05750	A0A0B4FJW9	A0A0B4FJW9_METAN	unreviewed	Methyltransferase (Fragment)	Metarhizium anisopliae ARSEF 549	260	GO:0008168	methyltransferase activity [GO:0008168]	NULL	NULL	1 out of 5	NULL	KID66091;	K22123
118.565	KID65044.1	562	amino acid permease 2, partial	MAN_06055	A0A0B4G9M8	A0A0B4G9M8_METAN	unreviewed	Amino acid permease 2 (Fragment)	Metarhizium anisopliae ARSEF 549	562	GO:0015171; GO:0016021	integral component of membrane [GO:0016021]; amino acid transmembrane transporter activity [GO:0015171]	PF13520;	NULL	1 out of 5	NULL	KID65044;	NULL
141.246	KID61188.1	517	ATP synthase beta chain precursor, partial	MAN_09472	A0A0B4ESS1	A0A0B4ESS1_METAN	unreviewed	ATP synthase subunit beta (EC 3.6.3.14) (Fragment)	Metarhizium anisopliae ARSEF 549	517	GO:0005524; GO:0015986; GO:0045261; GO:0046933	proton-transporting ATP synthase complex, catalytic core F(1) [GO:0045261]; ATP binding [GO:0005524]; proton-transporting ATP synthase activity, rotational mechanism [GO:0046933]; ATP synthesis coupled proton transport [GO:0015986]	PF00006;PF02874;	NULL	2 out of 5	NULL	KID61188;	K02133
117.534	KID60586.1	363	Floculation protein FLO1, partial	MAN_09721	A0A0B4F3Y3	A0A0B4F3Y3_METAN	unreviewed	Floculation protein FLO1 (Fragment)	Metarhizium anisopliae ARSEF 549	363	NULL	NULL	PF10528;	SIGNAL 1 23 {ECO:0000256|SAM:SignalP}.	1 out of 5	NULL	KID60586;	NULL
110.317	KID71234.1	246	hypothetical protein MAN_00833, partial	MAN_00833	A0A0B4GT35	A0A0B4GT35_METAN	unreviewed	Uncharacterized protein (Fragment)	Metarhizium anisopliae ARSEF 549	246	NULL	NULL	NULL	SIGNAL 1 20 {ECO:0000256|SAM:SignalP}.	1 out of 5	NULL	KID71234;	NULL
136.091	KID66343.1	1151	Ankyrin repeat-containing domain protein, partial	MAN_04624	A0A0B4F751	A0A0B4F751_METAN	unreviewed	Ankyrin repeat-containing domain protein (Fragment)	Metarhizium anisopliae ARSEF 549	1151	GO:0003824; GO:0009116	catalytic activity [GO:0003824]; nucleoside metabolic process [GO:0009116]	PF13401;PF12796;PF01048;	NULL	1 out of 5	NULL	KID66343;	NULL
349.508	KID64025.1	529	glycosyltransferase family 31 protein, partial	MAN_07196	A0A0B4EPT2	A0A0B4EPT2_METAN	unreviewed	Glycosyltransferase family 31 protein (Fragment)	Metarhizium anisopliae ARSEF 549	529	GO:0016740	transferase activity [GO:0016740]	PF04646;	NULL	1 out of 5	NULL	KID64025;	NULL
83.5107	KID70555.1	152	hypothetical protein MAN_00154, partial	MAN_00154	A0A0B4F915	A0A0B4F915_METAN	unreviewed	Uncharacterized protein (Fragment)	Metarhizium anisopliae ARSEF 549	152	NULL	NULL	NULL	SIGNAL 1 18 {ECO:0000256|SAM:SignalP}.	1 out of 5	NULL	KID70555;	NULL
102.069	KID63537.1	523	cytochrome P450 3A31, partial	MAN_07738	A0A0B4F733	A0A0B4F733_METAN	unreviewed	Cytochrome P450 3A31 (Fragment)	Metarhizium anisopliae ARSEF 549	523	GO:0004497; GO:0005506; GO:0016021; GO:0016705; GO:0020037	integral component of membrane [GO:0016021]; heme binding [GO:0020037]; iron ion binding [GO:0005506]; monooxygenase activity [GO:0004497]; oxidoreductase activity, acting on paired donors, with incorporation or reduction of molecular oxygen [GO:0016705]	PF00067;	NULL	1 out of 5	NULL	KID63537;	NULL
377.345	KID65353.1	1727	HC-toxin synthetase, partial	MAN_06364	A0A0B4F4F0	A0A0B4F4F0_METAN	unreviewed	HC-toxin synthetase (Fragment)	Metarhizium anisopliae ARSEF 549	1727	GO:0003824; GO:0008152	catalytic activity [GO:0003824]; metabolic process [GO:0008152]	PF00501;PF00668;PF00550;	NULL	1 out of 5	NULL	KID65353;	NULL
204.137	KID62907.1	238	hypothetical protein MAN_08123, partial	MAN_08123	A0A0B4F527	A0A0B4F527_METAN	unreviewed	Uncharacterized protein (Fragment)	Metarhizium anisopliae ARSEF 549	238	NULL	NULL	PF14040;	SIGNAL 1 18 {ECO:0000256|SAM:SignalP}.	1 out of 5	NULL	KID62907;	NULL
86.6037	KID66666.1	320	Taurine catabolism dioxygenase TauD/TfdA, partial	MAN_04947	A0A0B4FLM2	A0A0B4FLM2_METAN	unreviewed	Taurine catabolism dioxygenase TauD/TfdA (Fragment)	Metarhizium anisopliae ARSEF 549	320	GO:0051213	dioxygenase activity [GO:0051213]	PF02668;	NULL	1 out of 5	NULL	KID66666;	NULL
1035.12	KID61448.1	344	nonribosomal peptide synthase, partial	MAN_09213	A0A0B4ETN0	A0A0B4ETN0_METAN	unreviewed	Nonribosomal peptide synthase (Fragment)	Metarhizium anisopliae ARSEF 549	344	NULL	NULL	PF00668;PF00550;	NULL	1 out of 5	NULL	KID61448;	NULL
93.8206	KID62591.1	1197	WD40/YVTN repeat-like-containing domain protein, partial	MAN_07807	A0A0B4F9Y1	A0A0B4F9Y1_METAN	unreviewed	WD40/YVTN repeat-like-containing domain protein (Fragment)	Metarhizium anisopliae ARSEF 549	1197	GO:0003824; GO:0009116	catalytic activity [GO:0003824]; nucleoside metabolic process [GO:0009116]	PF12894;PF00400;	NULL	1 out of 5	NULL	KID62591;	NULL
25.7749	KID62659.1	140	hypothetical protein MAN_07875, partial	MAN_07875	A0A0B4G2J2	A0A0B4G2J2_METAN	unreviewed	Uncharacterized protein (Fragment)	Metarhizium anisopliae ARSEF 549	140	NULL	NULL	NULL	NULL	1 out of 5	NULL	KID62659;	NULL
90.7277	KID63977.1	178	hypothetical protein MAN_07148, partial	MAN_07148	A0A0B4F8A8	A0A0B4F8A8_METAN	unreviewed	Uncharacterized protein (Fragment)	Metarhizium anisopliae ARSEF 549	178	NULL	NULL	NULL	NULL	1 out of 5	NULL	KID63977;	NULL
70.1077	KID65086.1	445	G-protein coupled receptor, partial	MAN_06097	A0A0B4FH14	A0A0B4FH14_METAN	unreviewed	G-protein coupled receptor (Fragment)	Metarhizium anisopliae ARSEF 549	445	GO:0004888; GO:0007166; GO:0016021	integral component of membrane [GO:0016021]; transmembrane signaling receptor activity [GO:0004888]; cell surface receptor signaling pathway [GO:0007166]	NULL	NULL	1 out of 5	NULL	KID65086;	NULL
3495.08	KID65363.1	184	Phenylacetic acid degradation-related protein, partial	MAN_06374	A0A0B4F4G1	A0A0B4F4G1_METAN	unreviewed	Phenylacetic acid degradation-related protein (Fragment)	Metarhizium anisopliae ARSEF 549	184	NULL	NULL	PF03061;	NULL	1 out of 5	NULL	KID65363;	NULL
248.47	KID59956.1	94	hypothetical protein MAN_10206, partial	MAN_10206	A0A0B4F289	A0A0B4F289_METAN	unreviewed	Uncharacterized protein (Fragment)	Metarhizium anisopliae ARSEF 549	94	NULL	NULL	NULL	SIGNAL 1 16 {ECO:0000256|SAM:SignalP}.	1 out of 5	NULL	KID59956;	NULL
78.3557	KID69089.1	208	nitroreductase family protein, partial	MAN_01603	A0A0B4GLG5	A0A0B4GLG5_METAN	unreviewed	Nitroreductase family protein (Fragment)	Metarhizium anisopliae ARSEF 549	208	GO:0016657; GO:0034599	oxidoreductase activity, acting on NAD(P)H, nitrogenous group as acceptor [GO:0016657]; cellular response to oxidative stress [GO:0034599]	PF00881;	NULL	1 out of 5	NULL	KID69089;	K07078
2730.08	KID68168.1	334	leucoanthocyanidin dioxygenase, partial	MAN_03024	A0A0B4FCE6	A0A0B4FCE6_METAN	unreviewed	Leucoanthocyanidin dioxygenase (Fragment)	Metarhizium anisopliae ARSEF 549	334	GO:0046872; GO:0051213	dioxygenase activity [GO:0051213]; metal ion binding [GO:0046872]	PF03171;PF14226;	NULL	1 out of 5	NULL	KID68168;	NULL
50.5188	KID63995.1	534	hypothetical protein MAN_07166, partial	MAN_07166	A0A0B4EPP2	A0A0B4EPP2_METAN	unreviewed	Uncharacterized protein (Fragment)	Metarhizium anisopliae ARSEF 549	534	NULL	NULL	NULL	NULL	1 out of 5	NULL	KID63995;	NULL
785.619	KID70492.1	1546	nacht nucleoside triphosphatase, partial	MAN_00091	A0A0B4FRZ3	A0A0B4FRZ3_METAN	unreviewed	Nacht nucleoside triphosphatase (Fragment)	Metarhizium anisopliae ARSEF 549	1546	NULL	NULL	NULL	NULL	1 out of 5	NULL	KID70492;	NULL
84.5417	KID64661.1	391	subtilisin-like protease PR1K, partial	MAN_06835	A0A0B4FFR5	A0A0B4FFR5_METAN	unreviewed	Subtilisin-like protease PR1K (Fragment)	Metarhizium anisopliae ARSEF 549	391	GO:0004252	serine-type endopeptidase activity [GO:0004252]	PF05922;PF00082;	NULL	1 out of 5	NULL	KID64661;	NULL
74.2317	KID69898.1	561	Major facilitator superfamily domain, general substrate transporter, partial	MAN_02412	A0A0B4FHG9	A0A0B4FHG9_METAN	unreviewed	Major facilitator superfamily domain, general substrate transporter (Fragment)	Metarhizium anisopliae ARSEF 549	561	GO:0016021; GO:0055085	integral component of membrane [GO:0016021]; transmembrane transport [GO:0055085]	PF07690;	NULL	1 out of 5	NULL	KID69898;	NULL
70.1077	KID65611.1	78	hypothetical protein MAN_05270, partial	MAN_05270	A0A0B4FIG8	A0A0B4FIG8_METAN	unreviewed	Uncharacterized protein (Fragment)	Metarhizium anisopliae ARSEF 549	78	NULL	NULL	NULL	SIGNAL 1 21 {ECO:0000256|SAM:SignalP}.	1 out of 5	NULL	KID65611;	NULL
81.4487	KID62700.1	360	glycosyl transferase, partial	MAN_07916	A0A0B4EKT0	A0A0B4EKT0_METAN	unreviewed	Glycosyl transferase (Fragment)	Metarhizium anisopliae ARSEF 549	360	GO:0016021; GO:0016740	integral component of membrane [GO:0016021]; transferase activity [GO:0016740]	PF04488;	NULL	1 out of 5	NULL	KID62700;	NULL
6321.04	KID65013.1	3554	Amino acid adenylation, partial	MAN_06024	A0A0B4F3F8	A0A0B4F3F8_METAN	unreviewed	Amino acid adenylation (Fragment)	Metarhizium anisopliae ARSEF 549	3554	GO:0003824; GO:0008152; GO:0031177	catalytic activity [GO:0003824]; phosphopantetheine binding [GO:0031177]; metabolic process [GO:0008152]	PF00501;PF00668;PF00550;	NULL	1 out of 5	NULL	KID65013;	NULL
72.1697	KID62637.1	113	hypothetical protein MAN_07853, partial	MAN_07853	A0A0B4F4E0	A0A0B4F4E0_METAN	unreviewed	Uncharacterized protein (Fragment)	Metarhizium anisopliae ARSEF 549	113	NULL	NULL	NULL	SIGNAL 1 17 {ECO:0000256|SAM:SignalP}.	1 out of 5	NULL	KID62637;	NULL
49.4878	KID63970.1	1521	nacht nucleoside triphosphatase, partial	MAN_07141	A0A0B4EPL2	A0A0B4EPL2_METAN	unreviewed	Nacht nucleoside triphosphatase (Fragment)	Metarhizium anisopliae ARSEF 549	1521	GO:0016021	integral component of membrane [GO:0016021]	NULL	NULL	1 out of 5	NULL	KID63970;	NULL
43.3018	KID67007.1	283	Pyruvate/Phosphoenolpyruvate kinase, partial	MAN_03765	A0A0B4FGL6	A0A0B4FGL6_METAN	unreviewed	Pyruvate/Phosphoenolpyruvate kinase (Fragment)	Metarhizium anisopliae ARSEF 549	283	GO:0016301	kinase activity [GO:0016301]	NULL	NULL	1 out of 5	NULL	KID67007;	NULL
80.4177	KID71308.1	499	benzoate 4-monooxygenase cytochrome P450, partial	MAN_00907	A0A0B4FLI6	A0A0B4FLI6_METAN	unreviewed	Benzoate 4-monooxygenase cytochrome P450 (Fragment)	Metarhizium anisopliae ARSEF 549	499	GO:0004497; GO:0005506; GO:0016021; GO:0016705; GO:0020037	integral component of membrane [GO:0016021]; heme binding [GO:0020037]; iron ion binding [GO:0005506]; monooxygenase activity [GO:0004497]; oxidoreductase activity, acting on paired donors, with incorporation or reduction of molecular oxygen [GO:0016705]	PF00067;	NULL	1 out of 5	NULL	KID71308;	NULL
69.0767	KID62647.1	285	Allergen V5/Tpx-1-related protein, partial	MAN_07863	A0A0B4F4E7	A0A0B4F4E7_METAN	unreviewed	Allergen V5/Tpx-1-related protein (Fragment)	Metarhizium anisopliae ARSEF 549	285	GO:0005576	extracellular region [GO:0005576]	PF00188;	NULL	1 out of 5	NULL	KID62647;	NULL
8690.27	KID65361.1	290	macrophomate synthase, partial	MAN_06372	A0A0B4FHN5	A0A0B4FHN5_METAN	unreviewed	Macrophomate synthase (Fragment)	Metarhizium anisopliae ARSEF 549	290	GO:0003824	catalytic activity [GO:0003824]	PF03328;	NULL	1 out of 5	NULL	KID65361;	NULL
4153.88	KID65951.1	365	aspartic peptidase A1, partial	MAN_05610	A0A0B4FJD3	A0A0B4FJD3_METAN	unreviewed	Aspartic peptidase A1 (Fragment)	Metarhizium anisopliae ARSEF 549	365	GO:0004190	aspartic-type endopeptidase activity [GO:0004190]	PF00026;	NULL	1 out of 5	NULL	KID65951;	NULL
5760.18	KID69483.1	164	phosphatidylglycerol / phosphatidylinositol transfer protein, partial	MAN_01997	A0A0B4FGA2	A0A0B4FGA2_METAN	unreviewed	Phosphatidylglycerol / phosphatidylinositol transfer protein (Fragment)	Metarhizium anisopliae ARSEF 549	164	GO:0005622; GO:0032366	intracellular [GO:0005622]; intracellular sterol transport [GO:0032366]	PF02221;	SIGNAL 1 19 {ECO:0000256|SAM:SignalP}.	1 out of 5	NULL	KID69483;	NULL
6537.55	KID61331.1	105	hypothetical protein MAN_09096, partial	MAN_09096	A0A0B4F636	A0A0B4F636_METAN	unreviewed	Uncharacterized protein (Fragment)	Metarhizium anisopliae ARSEF 549	105	NULL	NULL	NULL	NULL	1 out of 5	NULL	KID61331;	NULL
414.46	KID69321.1	160	Mannose-binding lectin, partial	MAN_01835	A0A0B4FUE9	A0A0B4FUE9_METAN	unreviewed	Mannose-binding lectin (Fragment)	Metarhizium anisopliae ARSEF 549	160	GO:0030246	carbohydrate binding [GO:0030246]	NULL	NULL	1 out of 5	NULL	KID69321;	NULL
1203.17	KID70522.1	89	hypothetical protein MAN_00121, partial	MAN_00121	A0A0B4FS18	A0A0B4FS18_METAN	unreviewed	Uncharacterized protein (Fragment)	Metarhizium anisopliae ARSEF 549	89	NULL	NULL	NULL	NULL	1 out of 5	NULL	KID70522;	NULL
1910.44	KID59955.1	316	Major facilitator superfamily domain, general substrate transporter, partial	MAN_10205	A0A0B4ECQ9	A0A0B4ECQ9_METAN	unreviewed	Major facilitator superfamily domain, general substrate transporter (Fragment)	Metarhizium anisopliae ARSEF 549	316	GO:0016021; GO:0055085	integral component of membrane [GO:0016021]; transmembrane transport [GO:0055085]	PF07690;	NULL	1 out of 5	NULL	KID59955;	NULL
5208.59	KID61449.1	4002	Non-robosomal peptide synthetase, partial	MAN_09214	A0A0B4FYW6	A0A0B4FYW6_METAN	unreviewed	Non-robosomal peptide synthetase (Fragment)	Metarhizium anisopliae ARSEF 549	4002	GO:0003824; GO:0008152	catalytic activity [GO:0003824]; metabolic process [GO:0008152]	PF00501;PF00668;PF00550;	NULL	1 out of 5	NULL	KID61449;	NULL
3514.67	KID61421.1	467	Major facilitator superfamily domain, general substrate transporter, partial	MAN_09186	A0A0B4F6D1	A0A0B4F6D1_METAN	unreviewed	Major facilitator superfamily domain, general substrate transporter (Fragment)	Metarhizium anisopliae ARSEF 549	467	GO:0016021; GO:0055085	integral component of membrane [GO:0016021]; transmembrane transport [GO:0055085]	PF07690;	NULL	1 out of 5	NULL	KID61421;	NULL
53.6118	KID65094.1	402	chitinase, partial	MAN_06105	A0A0B4G9S4	A0A0B4G9S4_METAN	unreviewed	Chitinase (Fragment)	Metarhizium anisopliae ARSEF 549	402	GO:0004553; GO:0005975; GO:0008061	chitin binding [GO:0008061]; hydrolase activity, hydrolyzing O-glycosyl compounds [GO:0004553]; carbohydrate metabolic process [GO:0005975]	PF00704;	SIGNAL 1 20 {ECO:0000256|SAM:SignalP}.	1 out of 5	NULL	KID65094;	K01183
2158.91	KID69210.1	343	methyltransferase MppJ, partial	MAN_01724	A0A0B4F521	A0A0B4F521_METAN	unreviewed	Methyltransferase MppJ (Fragment)	Metarhizium anisopliae ARSEF 549	343	GO:0008168	methyltransferase activity [GO:0008168]	NULL	NULL	1 out of 5	NULL	KID69210;	NULL
10578	KID65358.1	462	delta-12 fatty acid desaturase, partial	MAN_06369	A0A0B4F4F6	A0A0B4F4F6_METAN	unreviewed	Delta-12 fatty acid desaturase (Fragment)	Metarhizium anisopliae ARSEF 549	462	GO:0006629; GO:0016021	integral component of membrane [GO:0016021]; lipid metabolic process [GO:0006629]	PF00487;	NULL	1 out of 5	NULL	KID65358;	NULL
5040.54	KID61450.1	286	methyltransferase type 12, partial	MAN_09215	A0A0B4EH49	A0A0B4EH49_METAN	unreviewed	Methyltransferase type 12 (Fragment)	Metarhizium anisopliae ARSEF 549	286	GO:0008168	methyltransferase activity [GO:0008168]	NULL	NULL	1 out of 5	NULL	KID61450;	NULL
643.342	KID62613.1	608	arginine deiminase type-3, partial	MAN_07829	A0A0B4EX36	A0A0B4EX36_METAN	unreviewed	Arginine deiminase type-3 (Fragment)	Metarhizium anisopliae ARSEF 549	608	GO:0004668; GO:0005509; GO:0005737; GO:0018101	cytoplasm [GO:0005737]; calcium ion binding [GO:0005509]; protein-arginine deiminase activity [GO:0004668]; protein citrullination [GO:0018101]	PF03068;	SIGNAL 1 20 {ECO:0000256|SAM:SignalP}.	1 out of 5	NULL	KID62613;	K01481
15092.8	KID64471.1	92	hypothetical protein MAN_06645, partial	MAN_06645	A0A0B4FF53	A0A0B4FF53_METAN	unreviewed	Uncharacterized protein (Fragment)	Metarhizium anisopliae ARSEF 549	92	NULL	NULL	NULL	SIGNAL 1 17 {ECO:0000256|SAM:SignalP}.	1 out of 5	NULL	KID64471;	NULL
11438.9	KID65359.1	117	hypothetical protein MAN_06370, partial	MAN_06370	A0A0B4GAK7	A0A0B4GAK7_METAN	unreviewed	Uncharacterized protein (Fragment)	Metarhizium anisopliae ARSEF 549	117	NULL	NULL	NULL	NULL	1 out of 5	NULL	KID65359;	NULL
20131.2	KID65010.1	296	7alpha-cephem-methoxylase P8 chain related protein, partial	MAN_06021	A0A0B4EST3	A0A0B4EST3_METAN	unreviewed	7alpha-cephem-methoxylase P8 chain related protein (Fragment)	Metarhizium anisopliae ARSEF 549	296	NULL	NULL	NULL	NULL	1 out of 5	NULL	KID65010;	NULL
32280.5	KID71217.1	188	hypothetical protein MAN_00816, partial	MAN_00816	A0A0B4FU24	A0A0B4FU24_METAN	unreviewed	Uncharacterized protein (Fragment)	Metarhizium anisopliae ARSEF 549	188	NULL	NULL	NULL	NULL	1 out of 5	NULL	KID71217;	NULL
62.8908	KID69126.1	388	tripeptidyl peptidase A, partial	MAN_01640	A0A0B4FTW0	A0A0B4FTW0_METAN	unreviewed	Tripeptidyl peptidase A (Fragment)	Metarhizium anisopliae ARSEF 549	388	GO:0004252; GO:0046872	metal ion binding [GO:0046872]; serine-type endopeptidase activity [GO:0004252]	NULL	NULL	1 out of 5	NULL	KID69126;	K01279
7527.3	KID65012.1	525	benzoate 4-monooxygenase cytochrome P450, partial	MAN_06023	A0A0B4FB97	A0A0B4FB97_METAN	unreviewed	Benzoate 4-monooxygenase cytochrome P450 (Fragment)	Metarhizium anisopliae ARSEF 549	525	GO:0004497; GO:0005506; GO:0016705; GO:0020037	heme binding [GO:0020037]; iron ion binding [GO:0005506]; monooxygenase activity [GO:0004497]; oxidoreductase activity, acting on paired donors, with incorporation or reduction of molecular oxygen [GO:0016705]	PF00067;	NULL	1 out of 5	NULL	KID65012;	NULL
1395.97	KID71240.1	98	hypothetical protein MAN_00839, partial	MAN_00839	A0A0B4FAV8	A0A0B4FAV8_METAN	unreviewed	Uncharacterized protein (Fragment)	Metarhizium anisopliae ARSEF 549	98	NULL	NULL	NULL	NULL	1 out of 5	NULL	KID71240;	NULL
23296.4	KID61324.1	185	hypothetical protein MAN_09089, partial	MAN_09089	A0A0B4FYH8	A0A0B4FYH8_METAN	unreviewed	Uncharacterized protein (Fragment)	Metarhizium anisopliae ARSEF 549	185	NULL	NULL	NULL	NULL	1 out of 5	NULL	KID61324;	NULL
63.9218	KID71283.1	318	Transmembrane protein SKG6, partial	MAN_00882	A0A0B4FLG0	A0A0B4FLG0_METAN	unreviewed	Transmembrane protein SKG6 (Fragment)	Metarhizium anisopliae ARSEF 549	318	GO:0016021	integral component of membrane [GO:0016021]	NULL	SIGNAL 1 20 {ECO:0000256|SAM:SignalP}.	1 out of 5	NULL	KID71283;	NULL
6982.94	KID65365.1	363	2-nitropropane dioxygenase-like protein, partial	MAN_06376	A0A0B4ETV4	A0A0B4ETV4_METAN	unreviewed	2-nitropropane dioxygenase-like protein (Fragment)	Metarhizium anisopliae ARSEF 549	363	GO:0018580; GO:0051213	dioxygenase activity [GO:0051213]; nitronate monooxygenase activity [GO:0018580]	PF03060;	NULL	1 out of 5	NULL	KID65365;	NULL
11778.1	KID65009.1	352	Taurine catabolism dioxygenase TauD/TfdA, partial	MAN_06020	A0A0B4G9F8	A0A0B4G9F8_METAN	unreviewed	Taurine catabolism dioxygenase TauD/TfdA (Fragment)	Metarhizium anisopliae ARSEF 549	352	GO:0051213	dioxygenase activity [GO:0051213]	PF02668;	NULL	1 out of 5	NULL	KID65009;	NULL
6324.13	KID65367.1	361	NAD(P)-binding domain protein, partial	MAN_06378	A0A0B4FC47	A0A0B4FC47_METAN	unreviewed	NAD(P)-binding domain protein (Fragment)	Metarhizium anisopliae ARSEF 549	361	GO:0051287; GO:0055114	NAD binding [GO:0051287]; oxidation-reduction process [GO:0055114]	PF02826;	NULL	1 out of 5	NULL	KID65367;	NULL
29.8989	KID65856.1	819	hypothetical protein MAN_05515, partial	MAN_05515	A0A0B4FJ39	A0A0B4FJ39_METAN	unreviewed	Uncharacterized protein (Fragment)	Metarhizium anisopliae ARSEF 549	819	GO:0016021	integral component of membrane [GO:0016021]	PF11915;	NULL	1 out of 5	NULL	KID65856;	NULL
14218.5	KID61451.1	727	Membrane attack complex component/perforin, partial	MAN_09216	A0A0B4F6G7	A0A0B4F6G7_METAN	unreviewed	Membrane attack complex component/perforin (Fragment)	Metarhizium anisopliae ARSEF 549	727	NULL	NULL	PF01823;	NULL	1 out of 5	NULL	KID61451;	NULL
4579.68	KID68169.1	429	Pyridoxal phosphate-dependent transferase, major domain protein, partial	MAN_03025	A0A0B4GIL1	A0A0B4GIL1_METAN	unreviewed	Pyridoxal phosphate-dependent transferase, major domain protein (Fragment)	Metarhizium anisopliae ARSEF 549	429	GO:0009058; GO:0016740; GO:0030170	pyridoxal phosphate binding [GO:0030170]; transferase activity [GO:0016740]; biosynthetic process [GO:0009058]	PF00155;	NULL	1 out of 5	NULL	KID68169;	NULL
93849.5	KID66725.1	299	hypothetical protein MAN_05006, partial	MAN_05006	A0A0B4EXW0	A0A0B4EXW0_METAN	unreviewed	Uncharacterized protein (Fragment)	Metarhizium anisopliae ARSEF 549	299	NULL	NULL	NULL	SIGNAL 1 16 {ECO:0000256|SAM:SignalP}.	1 out of 5	NULL	KID66725;	NULL
51443.6	KID63445.1	577	tyrosinase, partial	MAN_07646	A0A0B4EN03	A0A0B4EN03_METAN	unreviewed	Tyrosinase (Fragment)	Metarhizium anisopliae ARSEF 549	577	GO:0016491; GO:0046872	metal ion binding [GO:0046872]; oxidoreductase activity [GO:0016491]	PF00264;	NULL	1 out of 5	NULL	KID63445;	K00505
4312.66	KID65316.1	301	hypothetical protein MAN_06327, partial	MAN_06327	A0A0B4FHJ7	A0A0B4FHJ7_METAN	unreviewed	Uncharacterized protein (Fragment)	Metarhizium anisopliae ARSEF 549	301	GO:0016021; GO:0043386	integral component of membrane [GO:0016021]; mycotoxin biosynthetic process [GO:0043386]	PF11807;	NULL	1 out of 5	NULL	KID65316;	NULL
2684.71	KID65669.1	350	carbohydrate-binding protein, partial	MAN_05328	A0A0B4GBK1	A0A0B4GBK1_METAN	unreviewed	Carbohydrate-binding protein (Fragment)	Metarhizium anisopliae ARSEF 549	350	NULL	NULL	NULL	SIGNAL 1 22 {ECO:0000256|SAM:SignalP}.	1 out of 5	NULL	KID65669;	NULL
3236.3	KID65362.1	556	CAIB/BAIF family enzyme, partial	MAN_06373	A0A0B4FC42	A0A0B4FC42_METAN	unreviewed	CAIB/BAIF family enzyme (Fragment)	Metarhizium anisopliae ARSEF 549	556	GO:0003824	catalytic activity [GO:0003824]	PF02515;	NULL	1 out of 5	NULL	KID65362;	NULL
9050.08	KID65315.1	119	hypothetical protein MAN_06326, partial	MAN_06326	A0A0B4ETR1	A0A0B4ETR1_METAN	unreviewed	Uncharacterized protein (Fragment)	Metarhizium anisopliae ARSEF 549	119	NULL	NULL	NULL	SIGNAL 1 19 {ECO:0000256|SAM:SignalP}.	1 out of 5	NULL	KID65315;	NULL
875.316	KID64440.1	548	cholinesterase, partial	MAN_06614	A0A0B4ER05	A0A0B4ER05_METAN	unreviewed	Carboxylic ester hydrolase (EC 3.1.1.-) (Fragment)	Metarhizium anisopliae ARSEF 549	548	GO:0016787	hydrolase activity [GO:0016787]	PF00135;	SIGNAL 1 18 {ECO:0000256|RuleBase:RU361235}.	1 out of 5	NULL	KID64440;	NULL
12249.3	KID70245.1	220	hypothetical protein MAN_02759, partial	MAN_02759	A0A0B4F817	A0A0B4F817_METAN	unreviewed	Uncharacterized protein (Fragment)	Metarhizium anisopliae ARSEF 549	220	NULL	NULL	NULL	NULL	1 out of 5	NULL	KID70245;	NULL
20988	KID64403.1	326	methionine synthase II (cobalamin-independent), partial	MAN_06577	A0A0B4F1T7	A0A0B4F1T7_METAN	unreviewed	Methionine synthase II (Cobalamin-independent) (Fragment)	Metarhizium anisopliae ARSEF 549	326	NULL	NULL	NULL	NULL	1 out of 5	NULL	KID64403;	NULL
34809.5	KID65006.1	331	Oxoglutarate/iron-dependent oxygenase, partial	MAN_06017	A0A0B4FGR0	A0A0B4FGR0_METAN	unreviewed	Oxoglutarate/iron-dependent oxygenase (Fragment)	Metarhizium anisopliae ARSEF 549	331	GO:0016491; GO:0046872	metal ion binding [GO:0046872]; oxidoreductase activity [GO:0016491]	PF03171;PF14226;	NULL	1 out of 5	NULL	KID65006;	NULL
6082.88	KID65364.1	522	Cytochrome P450, partial	MAN_06375	A0A0B4GAL2	A0A0B4GAL2_METAN	unreviewed	Cytochrome P450 (Fragment)	Metarhizium anisopliae ARSEF 549	522	GO:0004497; GO:0005506; GO:0016705; GO:0020037	heme binding [GO:0020037]; iron ion binding [GO:0005506]; monooxygenase activity [GO:0004497]; oxidoreductase activity, acting on paired donors, with incorporation or reduction of molecular oxygen [GO:0016705]	PF00067;	NULL	1 out of 5	NULL	KID65364;	NULL
554.676	KID66038.1	443	dimethylallyl tryptophan synthase GliD1, partial	MAN_05697	A0A0B4F6F0	A0A0B4F6F0_METAN	unreviewed	Dimethylallyl tryptophan synthase GliD1 (Fragment)	Metarhizium anisopliae ARSEF 549	443	GO:0009820; GO:0016765	transferase activity, transferring alkyl or aryl (other than methyl) groups [GO:0016765]; alkaloid metabolic process [GO:0009820]	PF11991;	NULL	1 out of 5	NULL	KID66038;	NULL
5104.46	KID65360.1	584	L-amino acid oxidase, partial	MAN_06371	A0A0B4ETV0	A0A0B4ETV0_METAN	unreviewed	L-amino acid oxidase (Fragment)	Metarhizium anisopliae ARSEF 549	584	GO:0016491	oxidoreductase activity [GO:0016491]	PF01593;	NULL	1 out of 5	NULL	KID65360;	NULL
19226	KID65356.1	262	Thioredoxin-like fold protein, partial	MAN_06367	A0A0B4FHN1	A0A0B4FHN1_METAN	unreviewed	Thioredoxin-like fold protein (Fragment)	Metarhizium anisopliae ARSEF 549	262	GO:0004364; GO:0005737; GO:0008152	cytoplasm [GO:0005737]; glutathione transferase activity [GO:0004364]; metabolic process [GO:0008152]	PF13417;	NULL	1 out of 5	NULL	KID65356;	K00799
6554.04	KID65366.1	259	Fatty acid hydroxylase, partial	MAN_06377	A0A0B4FHP0	A0A0B4FHP0_METAN	unreviewed	Fatty acid hydroxylase (Fragment)	Metarhizium anisopliae ARSEF 549	259	GO:0005506; GO:0008610; GO:0016021; GO:0016491	integral component of membrane [GO:0016021]; iron ion binding [GO:0005506]; oxidoreductase activity [GO:0016491]; lipid biosynthetic process [GO:0008610]	PF04116;	NULL	1 out of 5	NULL	KID65366;	K07750
42.2708	KID61458.1	534	proline rich protein 5MeD, partial	MAN_09223	A0A0B4ETP4	A0A0B4ETP4_METAN	unreviewed	Proline rich protein 5MeD (Fragment)	Metarhizium anisopliae ARSEF 549	534	NULL	NULL	NULL	SIGNAL 1 21 {ECO:0000256|SAM:SignalP}.	1 out of 5	NULL	KID61458;	NULL
27.8369	KID63483.1	253	trypsin-like protease, partial	MAN_07684	A0A0B4EZD5	A0A0B4EZD5_METAN	unreviewed	Trypsin-like protease (Fragment)	Metarhizium anisopliae ARSEF 549	253	GO:0004252	serine-type endopeptidase activity [GO:0004252]	PF00089;	SIGNAL 1 22 {ECO:0000256|SAM:SignalP}.	1 out of 5	NULL	KID63483;	K01312
2968.24	KID65003.1	444	Aminotransferase class-III, partial	MAN_06014	A0A0B4F3E3	A0A0B4F3E3_METAN	unreviewed	Aminotransferase class-III (Fragment)	Metarhizium anisopliae ARSEF 549	444	GO:0004587; GO:0030170	ornithine-oxo-acid transaminase activity [GO:0004587]; pyridoxal phosphate binding [GO:0030170]	PF00202;	NULL	1 out of 5	NULL	KID65003;	K00819
330.95	KID61631.1	99	hypothetical protein MAN_08870, partial	MAN_08870	A0A0B4F724	A0A0B4F724_METAN	unreviewed	Uncharacterized protein (Fragment)	Metarhizium anisopliae ARSEF 549	99	NULL	NULL	NULL	SIGNAL 1 21 {ECO:0000256|SAM:SignalP}.	1 out of 5	NULL	KID61631;	NULL
8756.25	KID65613.1	580	carboxylesterase family protein, partial	MAN_05272	A0A0B4F578	A0A0B4F578_METAN	unreviewed	Carboxylesterase family protein (Fragment)	Metarhizium anisopliae ARSEF 549	580	NULL	NULL	PF00135;	SIGNAL 1 20 {ECO:0000256|SAM:SignalP}.	1 out of 5	NULL	KID65613;	NULL
8150.02	KID60567.1	169	hypothetical protein MAN_09702, partial	MAN_09702	A0A0B4EY48	A0A0B4EY48_METAN	unreviewed	Uncharacterized protein (Fragment)	Metarhizium anisopliae ARSEF 549	169	NULL	NULL	NULL	NULL	1 out of 5	NULL	KID60567;	NULL
100602	KID69968.1	306	adhesin protein Mad2, partial	MAN_02482	A0A0B4FHP2	A0A0B4FHP2_METAN	unreviewed	Adhesin protein Mad2 (Fragment)	Metarhizium anisopliae ARSEF 549	306	NULL	NULL	NULL	NULL	1 out of 5	NULL	KID69968;	NULL
2192.93	KID65005.1	321	HpcH/HpaI aldolase/citrate lyase family protein, partial	MAN_06016	A0A0B4ESS7	A0A0B4ESS7_METAN	unreviewed	HpcH/HpaI aldolase/citrate lyase family protein (Fragment)	Metarhizium anisopliae ARSEF 549	321	GO:0016829	lyase activity [GO:0016829]	PF03328;	NULL	1 out of 5	NULL	KID65005;	NULL
129.906	KID60994.1	181	carbohydrate-binding module family 13 protein, partial	MAN_09278	A0A0B4FXK4	A0A0B4FXK4_METAN	unreviewed	Carbohydrate-binding module family 13 protein (Fragment)	Metarhizium anisopliae ARSEF 549	181	NULL	NULL	PF14200;	SIGNAL 1 18 {ECO:0000256|SAM:SignalP}.	1 out of 5	NULL	KID60994;	NULL
2313.56	KID68166.1	248	hypothetical protein MAN_03022, partial	MAN_03022	A0A0B4FQX9	A0A0B4FQX9_METAN	unreviewed	Uncharacterized protein (Fragment)	Metarhizium anisopliae ARSEF 549	248	NULL	NULL	NULL	SIGNAL 1 20 {ECO:0000256|SAM:SignalP}.	1 out of 5	NULL	KID68166;	NULL
3438.37	KID68170.1	224	phytanoyl-CoA dioxygenase family protein, partial	MAN_03026	A0A0B4F1X7	A0A0B4F1X7_METAN	unreviewed	Phytanoyl-CoA dioxygenase family protein (Fragment)	Metarhizium anisopliae ARSEF 549	224	GO:0051213	dioxygenase activity [GO:0051213]	PF05721;	NULL	1 out of 5	NULL	KID68170;	NULL
5620.99	KID65004.1	560	AMP-dependent synthetase/ligase, partial	MAN_06015	A0A0B4G9F3	A0A0B4G9F3_METAN	unreviewed	AMP-dependent synthetase/ligase (Fragment)	Metarhizium anisopliae ARSEF 549	560	GO:0008152; GO:0016874	ligase activity [GO:0016874]; metabolic process [GO:0008152]	PF00501;	NULL	1 out of 5	NULL	KID65004;	K18660
16888.7	KID60561.1	276	hypothetical protein MAN_09696, partial	MAN_09696	A0A0B4F3W8	A0A0B4F3W8_METAN	unreviewed	Uncharacterized protein (Fragment)	Metarhizium anisopliae ARSEF 549	276	NULL	NULL	NULL	NULL	1 out of 5	NULL	KID60561;	NULL
94.8516	KID61116.1	74	hypothetical protein MAN_09400, partial	MAN_09400	A0A0B4F5I5	A0A0B4F5I5_METAN	unreviewed	Uncharacterized protein (Fragment)	Metarhizium anisopliae ARSEF 549	74	NULL	NULL	NULL	SIGNAL 1 19 {ECO:0000256|SAM:SignalP}.	1 out of 5	NULL	KID61116;	NULL
2154.78	KID65355.1	399	Taurine catabolism dioxygenase TauD/TfdA, partial	MAN_06366	A0A0B4ETU6	A0A0B4ETU6_METAN	unreviewed	Taurine catabolism dioxygenase TauD/TfdA (Fragment)	Metarhizium anisopliae ARSEF 549	399	GO:0051213	dioxygenase activity [GO:0051213]	PF02668;	NULL	1 out of 5	NULL	KID65355;	NULL
3652.82	KID68201.1	522	trichodiene oxygenase, partial	MAN_03057	A0A0B4FR15	A0A0B4FR15_METAN	unreviewed	Trichodiene oxygenase (Fragment)	Metarhizium anisopliae ARSEF 549	522	GO:0005506; GO:0016021; GO:0016705; GO:0020037	integral component of membrane [GO:0016021]; heme binding [GO:0020037]; iron ion binding [GO:0005506]; oxidoreductase activity, acting on paired donors, with incorporation or reduction of molecular oxygen [GO:0016705]	PF00067;	NULL	1 out of 5	NULL	KID68201;	NULL
1235.13	KID65314.1	268	hypothetical protein MAN_06325, partial	MAN_06325	A0A0B4GAG3	A0A0B4GAG3_METAN	unreviewed	Uncharacterized protein (Fragment)	Metarhizium anisopliae ARSEF 549	268	GO:0043386	mycotoxin biosynthetic process [GO:0043386]	PF11807;	NULL	1 out of 5	NULL	KID65314;	NULL
252.594	KID63996.1	633	Heat shock protein Hsp70, partial	MAN_07167	A0A0B4FDP0	A0A0B4FDP0_METAN	unreviewed	Heat shock protein Hsp70 (Fragment)	Metarhizium anisopliae ARSEF 549	633	NULL	NULL	NULL	NULL	1 out of 5	NULL	KID63996;	NULL
22319	KID64462.1	303	Fungal fucose-specific lectin, partial	MAN_06636	A0A0B4F9Q0	A0A0B4F9Q0_METAN	unreviewed	Fungal fucose-specific lectin (Fragment)	Metarhizium anisopliae ARSEF 549	303	GO:0030246	carbohydrate binding [GO:0030246]	PF07938;	NULL	1 out of 5	NULL	KID64462;	NULL
2156.84	KID71963.1	141	hypothetical protein MAN_01562, partial	MAN_01562	A0A0B4FNK8	A0A0B4FNK8_METAN	unreviewed	Uncharacterized protein (Fragment)	Metarhizium anisopliae ARSEF 549	141	NULL	NULL	NULL	NULL	1 out of 5	NULL	KID71963;	NULL
10839.9	KID65238.1	363	Peptidyl-arginine deiminase, Porphyromonas-type, partial	MAN_06249	A0A0B4F417	A0A0B4F417_METAN	unreviewed	Peptidyl-arginine deiminase, Porphyromonas-type (Fragment)	Metarhizium anisopliae ARSEF 549	363	GO:0004668; GO:0009446	protein-arginine deiminase activity [GO:0004668]; putrescine biosynthetic process [GO:0009446]	PF04371;	NULL	1 out of 5	NULL	KID65238;	NULL
92.7896	KID63978.1	277	hypothetical protein MAN_07149, partial	MAN_07149	A0A0B4F0S3	A0A0B4F0S3_METAN	unreviewed	Uncharacterized protein (Fragment)	Metarhizium anisopliae ARSEF 549	277	NULL	NULL	NULL	NULL	1 out of 5	NULL	KID63978;	NULL
21.6509	KID70684.1	439	Major facilitator superfamily domain, general substrate transporter, partial	MAN_00283	A0A0B4GRE9	A0A0B4GRE9_METAN	unreviewed	Major facilitator superfamily domain, general substrate transporter (Fragment)	Metarhizium anisopliae ARSEF 549	439	GO:0016021; GO:0055085	integral component of membrane [GO:0016021]; transmembrane transport [GO:0055085]	PF07690;	NULL	1 out of 5	NULL	KID70684;	NULL
144.339	KID63442.1	167	hypothetical protein MAN_07643, partial	MAN_07643	A0A0B4F6N2	A0A0B4F6N2_METAN	unreviewed	Uncharacterized protein (Fragment)	Metarhizium anisopliae ARSEF 549	167	NULL	NULL	NULL	NULL	1 out of 5	NULL	KID63442;	NULL
4259.04	KID68167.1	524	Major facilitator superfamily domain, general substrate transporter, partial	MAN_03023	A0A0B4FJY0	A0A0B4FJY0_METAN	unreviewed	Major facilitator superfamily domain, general substrate transporter (Fragment)	Metarhizium anisopliae ARSEF 549	524	GO:0016021	integral component of membrane [GO:0016021]	NULL	NULL	1 out of 5	NULL	KID68167;	NULL
5138.48	KID59790.1	726	nb-arc, partial	MAN_10431	A0A0B4EC51	A0A0B4EC51_METAN	unreviewed	Nb-arc (Fragment)	Metarhizium anisopliae ARSEF 549	726	GO:0003824; GO:0009116; GO:0043531	ADP binding [GO:0043531]; catalytic activity [GO:0003824]; nucleoside metabolic process [GO:0009116]	PF00931;	NULL	1 out of 5	NULL	KID59790;	NULL
19.5889	KID59236.1	560	Major facilitator superfamily domain, general substrate transporter, partial	MAN_10832	A0A0B4F036	A0A0B4F036_METAN	unreviewed	Major facilitator superfamily domain, general substrate transporter (Fragment)	Metarhizium anisopliae ARSEF 549	560	GO:0016021; GO:0055085	integral component of membrane [GO:0016021]; transmembrane transport [GO:0055085]	PF07690;	NULL	1 out of 5	NULL	KID59236;	NULL
38989.2	KID65950.1	351	lysine amidinotransferase, partial	MAN_05609	A0A0B4EVH8	A0A0B4EVH8_METAN	unreviewed	Lysine amidinotransferase (Fragment)	Metarhizium anisopliae ARSEF 549	351	GO:0015067	amidinotransferase activity [GO:0015067]	NULL	NULL	1 out of 5	NULL	KID65950;	K00613
1501.13	KID71238.1	1747	gamma-glutamyltranspeptidase periplasmic precursor, partial	MAN_00837	A0A0B4FLA7	A0A0B4FLA7_METAN	unreviewed	Gamma-glutamyltranspeptidase periplasmic (Fragment)	Metarhizium anisopliae ARSEF 549	1747	NULL	NULL	NULL	NULL	1 out of 5	NULL	KID71238;	NULL
37.1159	KID70608.1	987	Nucleoside phosphorylase domain protein, partial	MAN_00207	A0A0B4FJK3	A0A0B4FJK3_METAN	unreviewed	Nucleoside phosphorylase domain protein (Fragment)	Metarhizium anisopliae ARSEF 549	987	GO:0003824; GO:0009116; GO:0043531	ADP binding [GO:0043531]; catalytic activity [GO:0003824]; nucleoside metabolic process [GO:0009116]	PF00931;PF01048;	NULL	1 out of 5	NULL	KID70608;	NULL
40.2088	KID64480.1	607	Peptidase S8, partial	MAN_06654	A0A0B4ER60	A0A0B4ER60_METAN	unreviewed	Peptidase S8 (Fragment)	Metarhizium anisopliae ARSEF 549	607	GO:0004252	serine-type endopeptidase activity [GO:0004252]	NULL	NULL	1 out of 5	NULL	KID64480;	NULL
1296.99	KID61420.1	167	hypothetical protein MAN_09185, partial	MAN_09185	A0A0B4EH15	A0A0B4EH15_METAN	unreviewed	Uncharacterized protein (Fragment)	Metarhizium anisopliae ARSEF 549	167	GO:0016021	integral component of membrane [GO:0016021]	NULL	NULL	1 out of 5	NULL	KID61420;	NULL
176.3	KID63953.1	203	hypothetical protein MAN_07124, partial	MAN_07124	A0A0B4F0P6	A0A0B4F0P6_METAN	unreviewed	Uncharacterized protein (Fragment)	Metarhizium anisopliae ARSEF 549	203	NULL	NULL	NULL	NULL	1 out of 5	NULL	KID63953;	NULL
23959.3	KID61613.1	783	hypothetical protein MAN_08852, partial	MAN_08852	A0A0B4EU73	A0A0B4EU73_METAN	unreviewed	Uncharacterized protein (Fragment)	Metarhizium anisopliae ARSEF 549	783	NULL	NULL	NULL	NULL	1 out of 5	NULL	KID61613;	NULL
1838.27	KID67472.1	223	Concanavalin A-like lectin/glucanase, partial	MAN_04230	A0A0B4FHW3	A0A0B4FHW3_METAN	unreviewed	Concanavalin A-like lectin/glucanase (Fragment)	Metarhizium anisopliae ARSEF 549	223	GO:0004190; GO:0030246	aspartic-type endopeptidase activity [GO:0004190]; carbohydrate binding [GO:0030246]	PF01828;	SIGNAL 1 21 {ECO:0000256|SAM:SignalP}.	1 out of 5	NULL	KID67472;	NULL
31.9609	KID65670.1	492	phosphotransferase family protein, partial	MAN_05329	A0A0B4EUQ5	A0A0B4EUQ5_METAN	unreviewed	Phosphotransferase family protein (Fragment)	Metarhizium anisopliae ARSEF 549	492	GO:0004672; GO:0005524	ATP binding [GO:0005524]; protein kinase activity [GO:0004672]	PF01636;	NULL	1 out of 5	NULL	KID65670;	NULL
4965.28	KID69394.1	805	hypothetical protein MAN_01908, partial	MAN_01908	A0A0B4GME3	A0A0B4GME3_METAN	unreviewed	Uncharacterized protein (Fragment)	Metarhizium anisopliae ARSEF 549	805	NULL	NULL	NULL	NULL	1 out of 5	NULL	KID69394;	NULL
1071.2	KID65313.1	233	hypothetical protein MAN_06324, partial	MAN_06324	A0A0B4F4A1	A0A0B4F4A1_METAN	unreviewed	Uncharacterized protein (Fragment)	Metarhizium anisopliae ARSEF 549	233	GO:0016021; GO:0043386	integral component of membrane [GO:0016021]; mycotoxin biosynthetic process [GO:0043386]	PF11807;	NULL	1 out of 5	NULL	KID65313;	NULL
1051.62	KID65092.1	346	CRAL/TRIO domain protein, partial	MAN_06103	A0A0B4FBL7	A0A0B4FBL7_METAN	unreviewed	CRAL/TRIO domain protein (Fragment)	Metarhizium anisopliae ARSEF 549	346	NULL	NULL	PF00650;PF03765;	NULL	1 out of 5	NULL	KID65092;	NULL
356.725	KID64389.1	844	ankyrin repeat-containing protein, partial	MAN_06563	A0A0B4G7L9	A0A0B4G7L9_METAN	unreviewed	Ankyrin repeat-containing protein (Fragment)	Metarhizium anisopliae ARSEF 549	844	NULL	NULL	PF12796;PF17100;	NULL	1 out of 5	NULL	KID64389;	NULL
7.21697	KID63544.1	2143	fatty acid synthase subunit beta dehydratase, partial	MAN_07745	A0A0B4G570	A0A0B4G570_METAN	unreviewed	Fatty acid synthase subunit beta dehydratase (Fragment)	Metarhizium anisopliae ARSEF 549	2143	GO:0004318; GO:0005835; GO:0006633	fatty acid synthase complex [GO:0005835]; enoyl-[acyl-carrier-protein] reductase (NADH) activity [GO:0004318]; fatty acid biosynthetic process [GO:0006633]	PF00698;PF08354;PF01575;PF16073;	NULL	1 out of 5	NULL	KID63544;	K00668
1092.86	KID61422.1	169	cytochrome p450, partial	MAN_09187	A0A0B4F0P8	A0A0B4F0P8_METAN	unreviewed	Cytochrome p450 (Fragment)	Metarhizium anisopliae ARSEF 549	169	NULL	NULL	NULL	NULL	1 out of 5	NULL	KID61422;	NULL
963.981	KID64382.1	128	Calcium-mediated lectin, partial	MAN_06556	A0A0B4F9F4	A0A0B4F9F4_METAN	unreviewed	Calcium-mediated lectin (Fragment)	Metarhizium anisopliae ARSEF 549	128	GO:0030246	carbohydrate binding [GO:0030246]	PF07472;	NULL	1 out of 5	NULL	KID64382;	NULL
29.8989	KID70499.1	301	Peptidase cysteine/serine, trypsin-like protein, partial	MAN_00098	A0A0B4GQU3	A0A0B4GQU3_METAN	unreviewed	Peptidase cysteine/serine, trypsin-like protein (Fragment)	Metarhizium anisopliae ARSEF 549	301	GO:0004252	serine-type endopeptidase activity [GO:0004252]	PF00089;	NULL	1 out of 5	NULL	KID70499;	K20677
34.0229	KID60997.1	217	NAD(P)(+)-binding proteins & short chain dehydrogenase, partial	MAN_09281	A0A0B4EZ85	A0A0B4EZ85_METAN	unreviewed	NAD(P)(+)-binding proteins & short chain dehydrogenase (Fragment)	Metarhizium anisopliae ARSEF 549	217	NULL	NULL	PF00106;	NULL	1 out of 5	NULL	KID60997;	NULL
633.032	KID66336.1	646	choline dehydrogenase, partial	MAN_04617	A0A0B4FKI0	A0A0B4FKI0_METAN	unreviewed	Choline dehydrogenase (Fragment)	Metarhizium anisopliae ARSEF 549	646	GO:0016614; GO:0050660	flavin adenine dinucleotide binding [GO:0050660]; oxidoreductase activity, acting on CH-OH group of donors [GO:0016614]	PF05199;PF00732;	SIGNAL 1 20 {ECO:0000256|SAM:SignalP}.	1 out of 5	NULL	KID66336;	NULL
10658.4	KID69152.1	267	oxidoreductase, 2OG-Fe(II) oxygenase family, partial	MAN_01666	A0A0B4FMX9	A0A0B4FMX9_METAN	unreviewed	Oxidoreductase, 2OG-Fe(II) oxygenase family (Fragment)	Metarhizium anisopliae ARSEF 549	267	GO:0016491; GO:0046872	metal ion binding [GO:0046872]; oxidoreductase activity [GO:0016491]	PF03171;PF14226;	NULL	1 out of 5	NULL	KID69152;	NULL
2779.57	KID60632.1	103	hypothetical protein MAN_09767, partial	MAN_09767	A0A0B4EY89	A0A0B4EY89_METAN	unreviewed	Uncharacterized protein (Fragment)	Metarhizium anisopliae ARSEF 549	103	NULL	NULL	NULL	SIGNAL 1 17 {ECO:0000256|SAM:SignalP}.	1 out of 5	NULL	KID60632;	NULL
12630.7	KID65947.1	517	Cytochrome P450 family protein, partial	MAN_05606	A0A0B4FDI5	A0A0B4FDI5_METAN	unreviewed	Cytochrome P450 family protein (Fragment)	Metarhizium anisopliae ARSEF 549	517	GO:0004497; GO:0005506; GO:0016705; GO:0020037	heme binding [GO:0020037]; iron ion binding [GO:0005506]; monooxygenase activity [GO:0004497]; oxidoreductase activity, acting on paired donors, with incorporation or reduction of molecular oxygen [GO:0016705]	PF00067;	NULL	1 out of 5	NULL	KID65947;	NULL
259.811	KID59600.1	960	transposase, partial	MAN_10541	A0A0B4EBN9	A0A0B4EBN9_METAN	unreviewed	Transposase (Fragment)	Metarhizium anisopliae ARSEF 549	960	GO:0006355	regulation of transcription, DNA-templated [GO:0006355]	PF03101;PF10551;	NULL	1 out of 5	NULL	KID59600;	NULL
37.1159	KID66332.1	266	hypothetical protein MAN_04613, partial	MAN_04613	A0A0B4FEN3	A0A0B4FEN3_METAN	unreviewed	Uncharacterized protein (Fragment)	Metarhizium anisopliae ARSEF 549	266	NULL	NULL	NULL	NULL	1 out of 5	NULL	KID66332;	NULL
26.8059	KID61181.1	2489	Beta-ketoacyl synthase, partial	MAN_09465	A0A0B4F5P0	A0A0B4F5P0_METAN	unreviewed	Beta-ketoacyl synthase (Fragment)	Metarhizium anisopliae ARSEF 549	2489	GO:0008152; GO:0016740; GO:0031177	phosphopantetheine binding [GO:0031177]; transferase activity [GO:0016740]; metabolic process [GO:0008152]	PF00698;PF16197;PF00109;PF02801;PF08659;PF08242;PF00550;PF14765;	NULL	1 out of 5	NULL	KID61181;	NULL
30.9299	KID63397.1	154	hypothetical protein MAN_07598, partial	MAN_07598	A0A0B4F6H7	A0A0B4F6H7_METAN	unreviewed	Uncharacterized protein (Fragment)	Metarhizium anisopliae ARSEF 549	154	NULL	NULL	NULL	NULL	1 out of 5	NULL	KID63397;	NULL
21.6509	KID70815.1	524	hypothetical protein MAN_00414, partial	MAN_00414	A0A0B4F9N1	A0A0B4F9N1_METAN	unreviewed	Uncharacterized protein (Fragment)	Metarhizium anisopliae ARSEF 549	524	NULL	NULL	NULL	NULL	1 out of 5	NULL	KID70815;	NULL
314.454	KID66722.1	220	hypothetical protein MAN_05003, partial	MAN_05003	A0A0B4FFS8	A0A0B4FFS8_METAN	unreviewed	Uncharacterized protein (Fragment)	Metarhizium anisopliae ARSEF 549	220	GO:0016021	integral component of membrane [GO:0016021]	NULL	NULL	1 out of 5	NULL	KID66722;	NULL
77.3247	KID65565.1	335	subtilisin-like serine protease, partial	MAN_05224	A0A0B4EUG5	A0A0B4EUG5_METAN	unreviewed	Subtilisin-like serine protease (Fragment)	Metarhizium anisopliae ARSEF 549	335	GO:0008233; GO:0016021	integral component of membrane [GO:0016021]; peptidase activity [GO:0008233]	NULL	NULL	1 out of 5	NULL	KID65565;	NULL
18.5579	KID63420.1	214	choline binding protein D, partial	MAN_07621	A0A0B4EMX8	A0A0B4EMX8_METAN	unreviewed	Choline binding protein D (Fragment)	Metarhizium anisopliae ARSEF 549	214	NULL	NULL	PF05257;	SIGNAL 1 19 {ECO:0000256|SAM:SignalP}.	1 out of 5	NULL	KID63420;	NULL
3925	KID70835.1	371	hypothetical protein MAN_00434, partial	MAN_00434	A0A0B4F9Q2	A0A0B4F9Q2_METAN	unreviewed	Uncharacterized protein (Fragment)	Metarhizium anisopliae ARSEF 549	371	GO:0016021	integral component of membrane [GO:0016021]	NULL	NULL	1 out of 5	NULL	KID70835;	NULL
16.4959	KID64085.1	397	hypothetical protein MAN_07256, partial	MAN_07256	A0A0B4EPZ2	A0A0B4EPZ2_METAN	unreviewed	Uncharacterized protein (Fragment)	Metarhizium anisopliae ARSEF 549	397	GO:0016021	integral component of membrane [GO:0016021]	NULL	NULL	1 out of 5	NULL	KID64085;	NULL
7819.07	KID63795.1	225	hypothetical protein MAN_06966, partial	MAN_06966	A0A0B4EP09	A0A0B4EP09_METAN	unreviewed	Uncharacterized protein (Fragment)	Metarhizium anisopliae ARSEF 549	225	NULL	NULL	NULL	SIGNAL 1 19 {ECO:0000256|SAM:SignalP}.	1 out of 5	NULL	KID63795;	NULL
20.6199	KID65014.1	116	hypothetical protein MAN_06025, partial	MAN_06025	A0A0B4G9G4	A0A0B4G9G4_METAN	unreviewed	Uncharacterized protein (Fragment)	Metarhizium anisopliae ARSEF 549	116	NULL	NULL	NULL	SIGNAL 1 21 {ECO:0000256|SAM:SignalP}.	1 out of 5	NULL	KID65014;	NULL
645.404	KID69068.1	256	hypothetical protein MAN_01582, partial	MAN_01582	A0A0B4FF62	A0A0B4FF62_METAN	unreviewed	Uncharacterized protein (Fragment)	Metarhizium anisopliae ARSEF 549	256	NULL	NULL	PF12697;	NULL	1 out of 5	NULL	KID69068;	NULL
15.4649	KID65580.1	285	hypothetical protein MAN_05239, partial	MAN_05239	A0A0B4EUH8	A0A0B4EUH8_METAN	unreviewed	Uncharacterized protein (Fragment)	Metarhizium anisopliae ARSEF 549	285	NULL	NULL	NULL	NULL	1 out of 5	NULL	KID65580;	NULL
17.5269	KID63533.1	791	protein kinase-like protein, partial	MAN_07734	A0A0B4EZL1	A0A0B4EZL1_METAN	unreviewed	Protein kinase-like protein (Fragment)	Metarhizium anisopliae ARSEF 549	791	GO:0004672; GO:0005524	ATP binding [GO:0005524]; protein kinase activity [GO:0004672]	PF12796;PF00069;	NULL	1 out of 5	NULL	KID63533;	K13303
1258.85	KID69124.1	1042	ABC bile acid transporter, partial	MAN_01638	A0A0B4GLI9	A0A0B4GLI9_METAN	unreviewed	ABC bile acid transporter (Fragment)	Metarhizium anisopliae ARSEF 549	1042	GO:0000770; GO:0005524; GO:0016021; GO:0042626	integral component of membrane [GO:0016021]; ATP binding [GO:0005524]; ATPase activity, coupled to transmembrane movement of substances [GO:0042626]; peptide pheromone export [GO:0000770]	PF00664;PF00005;	NULL	1 out of 5	NULL	KID69124;	NULL
28.8679	KID63531.1	722	lipase 3 precursor, partial	MAN_07732	A0A0B4FCD4	A0A0B4FCD4_METAN	unreviewed	Lipase 3 (Fragment)	Metarhizium anisopliae ARSEF 549	722	GO:0016021; GO:0016787	integral component of membrane [GO:0016021]; hydrolase activity [GO:0016787]	PF00135;	NULL	1 out of 5	NULL	KID63531;	NULL
20233.3	KID70702.1	127	hypothetical protein MAN_00301, partial	MAN_00301	A0A0B4FSL0	A0A0B4FSL0_METAN	unreviewed	Uncharacterized protein (Fragment)	Metarhizium anisopliae ARSEF 549	127	NULL	NULL	NULL	NULL	1 out of 5	NULL	KID70702;	NULL
215.478	KID59243.1	289	BNR repeat-containing glycosyl hydrolase, partial	MAN_10839	A0A0B4ELS5	A0A0B4ELS5_METAN	unreviewed	BNR repeat-containing glycosyl hydrolase (Fragment)	Metarhizium anisopliae ARSEF 549	289	GO:0016787	hydrolase activity [GO:0016787]	NULL	NULL	1 out of 5	NULL	KID59243;	NULL
529.932	KID63328.1	435	hypothetical protein MAN_07529, partial	MAN_07529	A0A0B4EYY7	A0A0B4EYY7_METAN	unreviewed	Uncharacterized protein (Fragment)	Metarhizium anisopliae ARSEF 549	435	NULL	NULL	PF07103;	NULL	1 out of 5	NULL	KID63328;	NULL
29.8989	KID61618.1	3447	non-ribosomal peptide synthetase, partial	MAN_08857	A0A0B4EU77	A0A0B4EU77_METAN	unreviewed	Non-ribosomal peptide synthetase (Fragment)	Metarhizium anisopliae ARSEF 549	3447	GO:0003824; GO:0008152; GO:0031177	catalytic activity [GO:0003824]; phosphopantetheine binding [GO:0031177]; metabolic process [GO:0008152]	PF00501;PF00668;PF00550;	NULL	1 out of 5	NULL	KID61618;	NULL
6786.02	KID68852.1	385	polysaccharide synthase, partial	MAN_03708	A0A0B4FLY5	A0A0B4FLY5_METAN	unreviewed	Polysaccharide synthase (Fragment)	Metarhizium anisopliae ARSEF 549	385	GO:0016021	integral component of membrane [GO:0016021]	NULL	SIGNAL 1 18 {ECO:0000256|SAM:SignalP}.	1 out of 5	NULL	KID68852;	NULL
7068.51	KID67018.1	281	methyl transferase-like protein, partial	MAN_03776	A0A0B4F8Z9	A0A0B4F8Z9_METAN	unreviewed	Methyl transferase-like protein (Fragment)	Metarhizium anisopliae ARSEF 549	281	GO:0016740	transferase activity [GO:0016740]	PF02353;	NULL	1 out of 5	NULL	KID67018;	NULL
254.656	KID70101.1	229	hypothetical protein MAN_02615, partial	MAN_02615	A0A0B4FWQ3	A0A0B4FWQ3_METAN	unreviewed	Uncharacterized protein (Fragment)	Metarhizium anisopliae ARSEF 549	229	NULL	NULL	NULL	SIGNAL 1 19 {ECO:0000256|SAM:SignalP}.	1 out of 5	NULL	KID70101;	NULL
60.8288	KID59681.1	356	endo-N-acetyl-beta-D-glucosaminidase precursor, partial	MAN_10487	A0A0B4F1I9	A0A0B4F1I9_METAN	unreviewed	Endo-N-acetyl-beta-D-glucosaminidase (Fragment)	Metarhizium anisopliae ARSEF 549	356	GO:0005975	carbohydrate metabolic process [GO:0005975]	PF00704;	SIGNAL 1 16 {ECO:0000256|SAM:SignalP}.	1 out of 5	NULL	KID59681;	NULL
7022.11	KID65357.1	283	methyltransferase, partial	MAN_06368	A0A0B4FC36	A0A0B4FC36_METAN	unreviewed	Methyltransferase (Fragment)	Metarhizium anisopliae ARSEF 549	283	GO:0008168	methyltransferase activity [GO:0008168]	NULL	NULL	1 out of 5	NULL	KID65357;	NULL
1311.43	KID68288.1	542	Major facilitator superfamily domain, general substrate transporter, partial	MAN_03144	A0A0B4FCR6	A0A0B4FCR6_METAN	unreviewed	Autophagy-related protein (Fragment)	Metarhizium anisopliae ARSEF 549	542	GO:0005774; GO:0006865; GO:0006914; GO:0016021	integral component of membrane [GO:0016021]; vacuolar membrane [GO:0005774]; amino acid transport [GO:0006865]; autophagy [GO:0006914]	PF11700;	NULL	2 out of 5	NULL	KID68288;	NULL
19.5889	KID61154.1	247	Inositol monophosphatase, partial	MAN_09438	A0A0B4FXZ9	A0A0B4FXZ9_METAN	unreviewed	Inositol-1-monophosphatase (EC 3.1.3.25) (Fragment)	Metarhizium anisopliae ARSEF 549	247	GO:0006021; GO:0008934; GO:0046854; GO:0046855; GO:0046872; GO:0052832; GO:0052833	inositol monophosphate 1-phosphatase activity [GO:0008934]; inositol monophosphate 3-phosphatase activity [GO:0052832]; inositol monophosphate 4-phosphatase activity [GO:0052833]; metal ion binding [GO:0046872]; inositol biosynthetic process [GO:0006021]; inositol phosphate dephosphorylation [GO:0046855]; phosphatidylinositol phosphorylation [GO:0046854]	PF00459;	NULL	2 out of 5	NULL	KID61154;	NULL
21688	KID70703.1	187	hypothetical protein MAN_00302, partial	MAN_00302	A0A0B4FJS6	A0A0B4FJS6_METAN	unreviewed	Uncharacterized protein (Fragment)	Metarhizium anisopliae ARSEF 549	187	GO:0016021	integral component of membrane [GO:0016021]	NULL	NULL	1 out of 5	NULL	KID70703;	NULL
1101.1	KID66093.1	545	Major facilitator superfamily domain, general substrate transporter, partial	MAN_05752	A0A0B4F6I1	A0A0B4F6I1_METAN	unreviewed	Major facilitator superfamily domain, general substrate transporter (Fragment)	Metarhizium anisopliae ARSEF 549	545	GO:0016021; GO:0055085	integral component of membrane [GO:0016021]; transmembrane transport [GO:0055085]	PF07690;	NULL	1 out of 5	NULL	KID66093;	NULL
82.4797	KID65035.1	257	metalloprotease MEP1, partial	MAN_06046	A0A0B4ET03	A0A0B4ET03_METAN	unreviewed	Metalloprotease MEP1 (Fragment)	Metarhizium anisopliae ARSEF 549	257	GO:0008237	metallopeptidase activity [GO:0008237]	PF05572;	SIGNAL 1 22 {ECO:0000256|SAM:SignalP}.	1 out of 5	NULL	KID65035;	NULL
10.31	KID60022.1	262	Trypsin- protease, partial	MAN_10272	A0A0B4EWE1	A0A0B4EWE1_METAN	unreviewed	Trypsin-protease (Fragment)	Metarhizium anisopliae ARSEF 549	262	GO:0004252	serine-type endopeptidase activity [GO:0004252]	PF00089;	SIGNAL 1 20 {ECO:0000256|SAM:SignalP}.	1 out of 5	NULL	KID60022;	NULL
14349.4	KID65008.1	394	Pyridoxal phosphate-dependent transferase, major domain protein, partial	MAN_06019	A0A0B4F3F1	A0A0B4F3F1_METAN	unreviewed	Pyridoxal phosphate-dependent transferase, major domain protein (Fragment)	Metarhizium anisopliae ARSEF 549	394	GO:0016740	transferase activity [GO:0016740]	PF00266;	NULL	1 out of 5	NULL	KID65008;	NULL
1754.76	KID71068.1	396	glycosyl hydrolase, partial	MAN_00667	A0A0B4FKX0	A0A0B4FKX0_METAN	unreviewed	Glycosyl hydrolase (Fragment)	Metarhizium anisopliae ARSEF 549	396	GO:0016787	hydrolase activity [GO:0016787]	PF03663;	SIGNAL 1 21 {ECO:0000256|SAM:SignalP}.	1 out of 5	NULL	KID71068;	NULL
13.4029	KID60558.1	550	Peptidase S28, partial	MAN_09693	A0A0B4EQW4	A0A0B4EQW4_METAN	unreviewed	Peptidase S28 (Fragment)	Metarhizium anisopliae ARSEF 549	550	GO:0008236	serine-type peptidase activity [GO:0008236]	PF05577;	SIGNAL 1 21 {ECO:0000256|SAM:SignalP}.	1 out of 5	NULL	KID60558;	NULL
112692	KID66318.1	410	phosphatidylserine decarboxylase, partial	MAN_04599	A0A0B4F723	A0A0B4F723_METAN	unreviewed	Phosphatidylserine decarboxylase (Fragment)	Metarhizium anisopliae ARSEF 549	410	GO:0004609; GO:0008654	phosphatidylserine decarboxylase activity [GO:0004609]; phospholipid biosynthetic process [GO:0008654]	PF02666;	NULL	1 out of 5	NULL	KID66318;	K01613
15.4649	KID69125.1	135	tripeptidyl peptidase A, partial	MAN_01639	A0A0B4F4V9	A0A0B4F4V9_METAN	unreviewed	Tripeptidyl peptidase A (Fragment)	Metarhizium anisopliae ARSEF 549	135	GO:0008236	serine-type peptidase activity [GO:0008236]	PF09286;	SIGNAL 1 23 {ECO:0000256|SAM:SignalP}.	1 out of 5	NULL	KID69125;	NULL
138.153	KID71472.1	1069	Male sterility, NAD-binding protein, partial	MAN_01071	A0A0B4FUS3	A0A0B4FUS3_METAN	unreviewed	Male sterility, NAD-binding protein (Fragment)	Metarhizium anisopliae ARSEF 549	1069	GO:0003824; GO:0008152	catalytic activity [GO:0003824]; metabolic process [GO:0008152]	PF00501;PF07993;PF00550;	NULL	1 out of 5	NULL	KID71472;	NULL
10.31	KID63680.1	74	conidiation-specific protein 10, partial	MAN_06851	A0A0B4ENQ0	A0A0B4ENQ0_METAN	unreviewed	Conidiation-specific protein 10 (Fragment)	Metarhizium anisopliae ARSEF 549	74	NULL	NULL	PF10685;	NULL	1 out of 5	NULL	KID63680;	NULL
909.339	KID64220.1	111	hypothetical protein MAN_06394, partial	MAN_06394	A0A0B4EQA1	A0A0B4EQA1_METAN	unreviewed	Uncharacterized protein (Fragment)	Metarhizium anisopliae ARSEF 549	111	NULL	NULL	NULL	SIGNAL 1 17 {ECO:0000256|SAM:SignalP}.	1 out of 5	NULL	KID64220;	NULL
1088.73	KID65665.1	525	MATE efflux family protein, partial	MAN_05324	A0A0B4EUQ0	A0A0B4EUQ0_METAN	unreviewed	MATE efflux family protein (Fragment)	Metarhizium anisopliae ARSEF 549	525	GO:0015238; GO:0015297; GO:0016021	integral component of membrane [GO:0016021]; antiporter activity [GO:0015297]; drug transmembrane transporter activity [GO:0015238]	PF01554;	NULL	1 out of 5	NULL	KID65665;	K03327
3513.63	KID64989.1	619	carbohydrate-binding protein, partial	MAN_06000	A0A0B4G9D2	A0A0B4G9D2_METAN	unreviewed	Carbohydrate-binding protein (Fragment)	Metarhizium anisopliae ARSEF 549	619	GO:0004222; GO:0008270; GO:0031012	extracellular matrix [GO:0031012]; metalloendopeptidase activity [GO:0004222]; zinc ion binding [GO:0008270]	PF00413;PF01471;	NULL	1 out of 5	NULL	KID64989;	K07761
3.09299	KID65318.1	283	Pregnancy-associated plasma protein-A, partial	MAN_06329	A0A0B4F4A8	A0A0B4F4A8_METAN	unreviewed	Pregnancy-associated plasma protein-A (Fragment)	Metarhizium anisopliae ARSEF 549	283	GO:0008237	metallopeptidase activity [GO:0008237]	NULL	NULL	1 out of 5	NULL	KID65318;	NULL
21.6509	KID69448.1	315	hypothetical protein MAN_01962, partial	MAN_01962	A0A0B4FG67	A0A0B4FG67_METAN	unreviewed	Uncharacterized protein (Fragment)	Metarhizium anisopliae ARSEF 549	315	NULL	NULL	NULL	SIGNAL 1 16 {ECO:0000256|SAM:SignalP}.	1 out of 5	NULL	KID69448;	NULL
745.41	KID70580.1	239	hypothetical protein MAN_00179, partial	MAN_00179	A0A0B4F932	A0A0B4F932_METAN	unreviewed	Uncharacterized protein (Fragment)	Metarhizium anisopliae ARSEF 549	239	NULL	NULL	NULL	SIGNAL 1 18 {ECO:0000256|SAM:SignalP}.	1 out of 5	NULL	KID70580;	NULL
17.5269	KID71309.1	468	Tryptophan halogenase, partial	MAN_00908	A0A0B4GTC8	A0A0B4GTC8_METAN	unreviewed	Tryptophan halogenase (Fragment)	Metarhizium anisopliae ARSEF 549	468	GO:0016491	oxidoreductase activity [GO:0016491]	NULL	SIGNAL 1 17 {ECO:0000256|SAM:SignalP}.	1 out of 5	NULL	KID71309;	NULL
5.15498	KID60540.1	183	hypothetical protein MAN_09675, partial	MAN_09675	A0A0B4EEI9	A0A0B4EEI9_METAN	unreviewed	Uncharacterized protein (Fragment)	Metarhizium anisopliae ARSEF 549	183	NULL	NULL	NULL	NULL	1 out of 5	NULL	KID60540;	NULL
13.4029	KID66094.1	249	glutathione S-transferase, partial	MAN_05753	A0A0B4GCW4	A0A0B4GCW4_METAN	unreviewed	Glutathione S-transferase (Fragment)	Metarhizium anisopliae ARSEF 549	249	GO:0016740	transferase activity [GO:0016740]	PF00043;PF13417;	NULL	1 out of 5	NULL	KID66094;	K22119
886.657	KID65905.1	1055	vegetative incompatibility protein 4, partial	MAN_05564	A0A0B4EVD1	A0A0B4EVD1_METAN	unreviewed	Vegetative incompatibility protein 4 (Fragment)	Metarhizium anisopliae ARSEF 549	1055	NULL	NULL	NULL	NULL	1 out of 5	NULL	KID65905;	NULL
3516.73	KID60325.1	414	thaumatin family protein, partial	MAN_09858	A0A0B4EDT0	A0A0B4EDT0_METAN	unreviewed	Thaumatin family protein (Fragment)	Metarhizium anisopliae ARSEF 549	414	NULL	NULL	PF00314;	NULL	1 out of 5	NULL	KID60325;	NULL
9774.87	KID69151.1	477	aspartate-tRNA ligase, partial	MAN_01665	A0A0B4FTY5	A0A0B4FTY5_METAN	unreviewed	Aspartate-tRNA ligase (Fragment)	Metarhizium anisopliae ARSEF 549	477	GO:0004812; GO:0005524; GO:0006418	aminoacyl-tRNA ligase activity [GO:0004812]; ATP binding [GO:0005524]; tRNA aminoacylation for protein translation [GO:0006418]	PF00152;	NULL	1 out of 5	NULL	KID69151;	K01876
23.7129	KID68072.1	428	choline dehydrogenase, partial	MAN_02928	A0A0B4FJQ6	A0A0B4FJQ6_METAN	unreviewed	Choline dehydrogenase (Fragment)	Metarhizium anisopliae ARSEF 549	428	GO:0016614; GO:0050660	flavin adenine dinucleotide binding [GO:0050660]; oxidoreductase activity, acting on CH-OH group of donors [GO:0016614]	PF00732;	NULL	1 out of 5	NULL	KID68072;	NULL
25064.5	KID61548.1	703	oxidoreductase, short chain dehydrogenase/reductase family, partial	MAN_08787	A0A0B4EU26	A0A0B4EU26_METAN	unreviewed	Oxidoreductase, short chain dehydrogenase/reductase family (Fragment)	Metarhizium anisopliae ARSEF 549	703	NULL	NULL	PF09994;	NULL	1 out of 5	NULL	KID61548;	NULL
11.341	KID65347.1	601	extracellular dihydrogeodin oxidase/laccase, partial	MAN_06358	A0A0B4FC27	A0A0B4FC27_METAN	unreviewed	Extracellular dihydrogeodin oxidase/laccase (Fragment)	Metarhizium anisopliae ARSEF 549	601	GO:0005507; GO:0016491	copper ion binding [GO:0005507]; oxidoreductase activity [GO:0016491]	PF00394;PF07731;PF07732;	SIGNAL 1 19 {ECO:0000256|SAM:SignalP}.	1 out of 5	NULL	KID65347;	NULL
3290.94	KID65165.1	887	interferon-induced GTP-binding protein Mx, partial	MAN_06176	A0A0B4ETB9	A0A0B4ETB9_METAN	unreviewed	Interferon-induced GTP-binding protein Mx (Fragment)	Metarhizium anisopliae ARSEF 549	887	GO:0003924; GO:0005525	GTP binding [GO:0005525]; GTPase activity [GO:0003924]	PF01031;PF00350;	NULL	1 out of 5	NULL	KID65165;	NULL
28.8679	KID65740.1	102	hypothetical protein MAN_05399, partial	MAN_05399	A0A0B4EUW9	A0A0B4EUW9_METAN	unreviewed	Uncharacterized protein (Fragment)	Metarhizium anisopliae ARSEF 549	102	NULL	NULL	NULL	SIGNAL 1 17 {ECO:0000256|SAM:SignalP}.	1 out of 5	NULL	KID65740;	NULL
13.4029	KID61418.1	644	Glucose-methanol-choline oxidoreductase, partial	MAN_09183	A0A0B4ETI5	A0A0B4ETI5_METAN	unreviewed	Glucose-methanol-choline oxidoreductase (Fragment)	Metarhizium anisopliae ARSEF 549	644	GO:0016614; GO:0050660	flavin adenine dinucleotide binding [GO:0050660]; oxidoreductase activity, acting on CH-OH group of donors [GO:0016614]	PF05199;PF00732;	NULL	1 out of 5	NULL	KID61418;	NULL
121.658	KID61701.1	189	hypothetical protein MAN_08940, partial	MAN_08940	A0A0B4F785	A0A0B4F785_METAN	unreviewed	Uncharacterized protein (Fragment)	Metarhizium anisopliae ARSEF 549	189	NULL	NULL	NULL	NULL	1 out of 5	NULL	KID61701;	NULL
59.7978	KID59811.1	353	hypothetical protein MAN_10452, partial	MAN_10452	A0A0B4F1V0	A0A0B4F1V0_METAN	unreviewed	Uncharacterized protein (Fragment)	Metarhizium anisopliae ARSEF 549	353	GO:0016021	integral component of membrane [GO:0016021]	NULL	NULL	1 out of 5	NULL	KID59811;	NULL
1478.45	KID65572.1	356	catalase, partial	MAN_05231	A0A0B4FCT1	A0A0B4FCT1_METAN	unreviewed	Catalase (Fragment)	Metarhizium anisopliae ARSEF 549	356	GO:0004096; GO:0006979; GO:0020037	catalase activity [GO:0004096]; heme binding [GO:0020037]; response to oxidative stress [GO:0006979]	PF00199;	NULL	1 out of 5	NULL	KID65572;	K03781
3565.18	KID69153.1	763	ABC transporter, partial	MAN_01667	A0A0B4FFC5	A0A0B4FFC5_METAN	unreviewed	ABC transporter (Fragment)	Metarhizium anisopliae ARSEF 549	763	GO:0016021	integral component of membrane [GO:0016021]	PF14518;	NULL	1 out of 5	NULL	KID69153;	NULL
18.5579	KID63844.1	201	hypothetical protein MAN_07015, partial	MAN_07015	A0A0B4G600	A0A0B4G600_METAN	unreviewed	Uncharacterized protein (Fragment)	Metarhizium anisopliae ARSEF 549	201	GO:0016491	oxidoreductase activity [GO:0016491]	NULL	NULL	1 out of 5	NULL	KID63844;	NULL
12.372	KID70618.1	290	conidiospore surface protein, partial	MAN_00217	A0A0B4FJL0	A0A0B4FJL0_METAN	unreviewed	Conidiospore surface protein (Fragment)	Metarhizium anisopliae ARSEF 549	290	NULL	NULL	PF10528;	SIGNAL 1 21 {ECO:0000256|SAM:SignalP}.	1 out of 5	NULL	KID70618;	NULL
1342.36	KID59356.1	118	hypothetical protein MAN_10768, partial	MAN_10768	A0A0B4F0H4	A0A0B4F0H4_METAN	unreviewed	Uncharacterized protein (Fragment)	Metarhizium anisopliae ARSEF 549	118	GO:0016021	integral component of membrane [GO:0016021]	NULL	NULL	1 out of 5	NULL	KID59356;	NULL
150.525	KID65093.1	200	hypothetical protein MAN_06104, partial	MAN_06104	A0A0B4F3Q2	A0A0B4F3Q2_METAN	unreviewed	Uncharacterized protein (Fragment)	Metarhizium anisopliae ARSEF 549	200	NULL	NULL	NULL	NULL	1 out of 5	NULL	KID65093;	NULL
6945.82	KID61612.1	2881	hypothetical protein MAN_08851, partial	MAN_08851	A0A0B4F192	A0A0B4F192_METAN	unreviewed	Uncharacterized protein (Fragment)	Metarhizium anisopliae ARSEF 549	2881	NULL	NULL	NULL	NULL	1 out of 5	NULL	KID61612;	NULL
14.4339	KID59668.1	374	Major facilitator superfamily domain, general substrate transporter, partial	MAN_10474	A0A0B4EN44	A0A0B4EN44_METAN	unreviewed	Major facilitator superfamily domain, general substrate transporter (Fragment)	Metarhizium anisopliae ARSEF 549	374	GO:0016021; GO:0055085	integral component of membrane [GO:0016021]; transmembrane transport [GO:0055085]	PF07690;	NULL	1 out of 5	NULL	KID59668;	NULL
10.31	KID68075.1	506	Cytochrome P450, partial	MAN_02931	A0A0B4F1Q4	A0A0B4F1Q4_METAN	unreviewed	Cytochrome P450 (Fragment)	Metarhizium anisopliae ARSEF 549	506	GO:0005506; GO:0016021; GO:0016705; GO:0020037	integral component of membrane [GO:0016021]; heme binding [GO:0020037]; iron ion binding [GO:0005506]; oxidoreductase activity, acting on paired donors, with incorporation or reduction of molecular oxygen [GO:0016705]	NULL	NULL	1 out of 5	NULL	KID68075;	NULL
917.587	KID64505.1	518	subtilisin-like serine protease, partial	MAN_06679	A0A0B4ER93	A0A0B4ER93_METAN	unreviewed	Subtilisin-like serine protease (Fragment)	Metarhizium anisopliae ARSEF 549	518	GO:0008233	peptidase activity [GO:0008233]	NULL	SIGNAL 1 26 {ECO:0000256|SAM:SignalP}.	1 out of 5	NULL	KID64505;	NULL
21246.8	KID68344.1	354	Queuosine biosynthesis protein, partial	MAN_03200	A0A0B4GJ37	A0A0B4GJ37_METAN	unreviewed	Queuosine biosynthesis protein (Fragment)	Metarhizium anisopliae ARSEF 549	354	GO:0016740; GO:0016853	isomerase activity [GO:0016853]; transferase activity [GO:0016740]	PF02547;	NULL	1 out of 5	NULL	KID68344;	K07568
14.4339	KID69421.1	899	transferase, partial	MAN_01935	A0A0B4FUP3	A0A0B4FUP3_METAN	unreviewed	Transferase (Fragment)	Metarhizium anisopliae ARSEF 549	899	GO:0008152; GO:0016021; GO:0016740	integral component of membrane [GO:0016021]; transferase activity [GO:0016740]; metabolic process [GO:0008152]	PF01663;	NULL	1 out of 5	NULL	KID69421;	K05310
105.162	KID61694.1	528	Cytochrome P450, partial	MAN_08933	A0A0B4FZP2	A0A0B4FZP2_METAN	unreviewed	Cytochrome P450 (Fragment)	Metarhizium anisopliae ARSEF 549	528	GO:0004497; GO:0005506; GO:0016021; GO:0016705; GO:0020037	integral component of membrane [GO:0016021]; heme binding [GO:0020037]; iron ion binding [GO:0005506]; monooxygenase activity [GO:0004497]; oxidoreductase activity, acting on paired donors, with incorporation or reduction of molecular oxygen [GO:0016705]	PF00067;	NULL	1 out of 5	NULL	KID61694;	NULL
221.664	KID64082.1	141	UMTA methyltransferase family protein, partial	MAN_07253	A0A0B4F8P6	A0A0B4F8P6_METAN	unreviewed	UMTA methyltransferase family protein (Fragment)	Metarhizium anisopliae ARSEF 549	141	GO:0008168	methyltransferase activity [GO:0008168]	NULL	NULL	1 out of 5	NULL	KID64082;	NULL
1814.55	KID68853.1	146	hypothetical protein MAN_03709, partial	MAN_03709	A0A0B4FEH0	A0A0B4FEH0_METAN	unreviewed	Uncharacterized protein (Fragment)	Metarhizium anisopliae ARSEF 549	146	NULL	NULL	NULL	SIGNAL 1 17 {ECO:0000256|SAM:SignalP}.	1 out of 5	NULL	KID68853;	NULL
677.364	KID68085.1	401	Vacuolar protein sorting-associated protein 62, partial	MAN_02941	A0A0B4F1R1	A0A0B4F1R1_METAN	unreviewed	Vacuolar protein sorting-associated protein 62 (Fragment)	Metarhizium anisopliae ARSEF 549	401	NULL	NULL	PF06101;	NULL	1 out of 5	NULL	KID68085;	NULL
5.15498	KID71297.1	284	hypothetical protein MAN_00896, partial	MAN_00896	A0A0B4FUA5	A0A0B4FUA5_METAN	unreviewed	Uncharacterized protein (Fragment)	Metarhizium anisopliae ARSEF 549	284	GO:0016021	integral component of membrane [GO:0016021]	NULL	NULL	1 out of 5	NULL	KID71297;	NULL
6953.04	KID61494.1	228	hypothetical protein MAN_09259, partial	MAN_09259	A0A0B4FZ13	A0A0B4FZ13_METAN	unreviewed	Uncharacterized protein (Fragment)	Metarhizium anisopliae ARSEF 549	228	GO:0016021	integral component of membrane [GO:0016021]	NULL	NULL	1 out of 5	NULL	KID61494;	NULL
4085.84	KID68560.1	419	Concanavalin A-like lectin/glucanase, partial	MAN_03416	A0A0B4F385	A0A0B4F385_METAN	unreviewed	Concanavalin A-like lectin/glucanase (Fragment)	Metarhizium anisopliae ARSEF 549	419	GO:0004553; GO:0005975; GO:0030246	carbohydrate binding [GO:0030246]; hydrolase activity, hydrolyzing O-glycosyl compounds [GO:0004553]; carbohydrate metabolic process [GO:0005975]	PF00722;	SIGNAL 1 23 {ECO:0000256|SAM:SignalP}.	1 out of 5	NULL	KID68560;	NULL
35844.6	KID67241.1	296	hypothetical protein MAN_03999, partial	MAN_03999	A0A0B4FNE7	A0A0B4FNE7_METAN	unreviewed	Uncharacterized protein (Fragment)	Metarhizium anisopliae ARSEF 549	296	NULL	NULL	NULL	SIGNAL 1 20 {ECO:0000256|SAM:SignalP}.	1 out of 5	NULL	KID67241;	NULL
41.2398	KID65291.1	525	hydrophobin, partial	MAN_06302	A0A0B4FHH6	A0A0B4FHH6_METAN	unreviewed	Hydrophobin (Fragment)	Metarhizium anisopliae ARSEF 549	525	GO:0005199; GO:0009277	fungal-type cell wall [GO:0009277]; structural constituent of cell wall [GO:0005199]	NULL	SIGNAL 1 28 {ECO:0000256|SAM:SignalP}.	1 out of 5	NULL	KID65291;	NULL
342.291	KID61093.1	489	Beta-ketoacyl synthase, partial	MAN_09377	A0A0B4ESK1	A0A0B4ESK1_METAN	unreviewed	Beta-ketoacyl synthase (Fragment)	Metarhizium anisopliae ARSEF 549	489	GO:0031177	phosphopantetheine binding [GO:0031177]	PF08242;PF00550;	NULL	1 out of 5	NULL	KID61093;	NULL
10.31	KID63681.1	195	HHE domain containing protein, partial	MAN_06852	A0A0B4FCR7	A0A0B4FCR7_METAN	unreviewed	HHE domain containing protein (Fragment)	Metarhizium anisopliae ARSEF 549	195	NULL	NULL	PF01814;	NULL	1 out of 5	NULL	KID63681;	NULL
9.27896	KID68706.1	477	cytochrome P450 4F8, partial	MAN_03562	A0A0B4FSL5	A0A0B4FSL5_METAN	unreviewed	Cytochrome P450 4F8 (Fragment)	Metarhizium anisopliae ARSEF 549	477	GO:0004497; GO:0005506; GO:0016705; GO:0020037	heme binding [GO:0020037]; iron ion binding [GO:0005506]; monooxygenase activity [GO:0004497]; oxidoreductase activity, acting on paired donors, with incorporation or reduction of molecular oxygen [GO:0016705]	PF00067;	NULL	1 out of 5	NULL	KID68706;	NULL
4199.25	KID70408.1	437	Major facilitator superfamily domain, general substrate transporter, partial	MAN_00007	A0A0B4FIZ6	A0A0B4FIZ6_METAN	unreviewed	Major facilitator superfamily domain, general substrate transporter (Fragment)	Metarhizium anisopliae ARSEF 549	437	GO:0016021; GO:0055085	integral component of membrane [GO:0016021]; transmembrane transport [GO:0055085]	PF07690;	NULL	1 out of 5	NULL	KID70408;	NULL
71.1387	KID62555.1	633	hypothetical protein MAN_07771, partial	MAN_07771	A0A0B4EKG6	A0A0B4EKG6_METAN	unreviewed	Uncharacterized protein (Fragment)	Metarhizium anisopliae ARSEF 549	633	NULL	NULL	NULL	SIGNAL 1 21 {ECO:0000256|SAM:SignalP}.	1 out of 5	NULL	KID62555;	NULL
0	KID65170.1	201	PLAC8 family protein, partial	MAN_06181	A0A0B4ETC4	A0A0B4ETC4_METAN	unreviewed	PLAC8 family protein (Fragment)	Metarhizium anisopliae ARSEF 549	201	NULL	NULL	PF04749;	NULL	1 out of 5	NULL	KID65170;	NULL
5.15498	KID67063.1	491	succinate-semialdehyde dehydrogenase NADP+, partial	MAN_03821	A0A0B4F957	A0A0B4F957_METAN	unreviewed	Succinate-semialdehyde dehydrogenase NADP (Fragment)	Metarhizium anisopliae ARSEF 549	491	GO:0016491	oxidoreductase activity [GO:0016491]	PF00171;	NULL	1 out of 5	NULL	KID67063;	K00135
264.966	KID64644.1	263	hypothetical protein MAN_06818, partial	MAN_06818	A0A0B4G8C9	A0A0B4G8C9_METAN	unreviewed	Uncharacterized protein (Fragment)	Metarhizium anisopliae ARSEF 549	263	GO:0016021	integral component of membrane [GO:0016021]	NULL	NULL	1 out of 5	NULL	KID64644;	NULL
1416.59	KID68343.1	329	(2R)-phospho-3-sulfolactate synthase, ComA, partial	MAN_03199	A0A0B4FCY0	A0A0B4FCY0_METAN	unreviewed	(2R)-phospho-3-sulfolactate synthase, ComA (Fragment)	Metarhizium anisopliae ARSEF 549	329	GO:0003824	catalytic activity [GO:0003824]	PF02679;	NULL	1 out of 5	NULL	KID68343;	NULL
11.341	KID64596.1	355	hypothetical protein MAN_06770, partial	MAN_06770	A0A0B4FFL0	A0A0B4FFL0_METAN	unreviewed	Uncharacterized protein (Fragment)	Metarhizium anisopliae ARSEF 549	355	GO:0016021	integral component of membrane [GO:0016021]	NULL	NULL	1 out of 5	NULL	KID64596;	NULL
30.9299	KID63538.1	1597	fatty acid synthase subunit alpha reductase, partial	MAN_07739	A0A0B4EZL6	A0A0B4EZL6_METAN	unreviewed	Fatty acid synthase subunit alpha reductase (Fragment)	Metarhizium anisopliae ARSEF 549	1597	GO:0004312; GO:0042759	fatty acid synthase activity [GO:0004312]; long-chain fatty acid biosynthetic process [GO:0042759]	PF00109;PF02801;	NULL	1 out of 5	NULL	KID63538;	K00667
13535.9	KID69937.1	822	peptidylarginine deiminase-like enzyme, partial	MAN_02451	A0A0B4FQ95	A0A0B4FQ95_METAN	unreviewed	Peptidylarginine deiminase-like enzyme (Fragment)	Metarhizium anisopliae ARSEF 549	822	GO:0004668; GO:0009446	protein-arginine deiminase activity [GO:0004668]; putrescine biosynthetic process [GO:0009446]	PF04371;	NULL	1 out of 5	NULL	KID69937;	NULL
23147.9	KID63153.1	1127	heme peroxidase, partial	MAN_07354	A0A0B4EYH4	A0A0B4EYH4_METAN	unreviewed	Heme peroxidase (Fragment)	Metarhizium anisopliae ARSEF 549	1127	GO:0004601; GO:0005506; GO:0006979; GO:0016705; GO:0020037; GO:0031408	heme binding [GO:0020037]; iron ion binding [GO:0005506]; oxidoreductase activity, acting on paired donors, with incorporation or reduction of molecular oxygen [GO:0016705]; peroxidase activity [GO:0004601]; oxylipin biosynthetic process [GO:0031408]; response to oxidative stress [GO:0006979]	PF03098;PF00067;	NULL	1 out of 5	NULL	KID63153;	K17862
0	KID69282.1	75	hypothetical protein MAN_01796, partial	MAN_01796	A0A0B4FNB0	A0A0B4FNB0_METAN	unreviewed	Uncharacterized protein (Fragment)	Metarhizium anisopliae ARSEF 549	75	NULL	NULL	NULL	NULL	1 out of 5	NULL	KID69282;	NULL
1313.49	KID62198.1	412	hypothetical protein MAN_08202, partial	MAN_08202	A0A0B4EVW5	A0A0B4EVW5_METAN	unreviewed	Uncharacterized protein (Fragment)	Metarhizium anisopliae ARSEF 549	412	NULL	NULL	NULL	NULL	1 out of 5	NULL	KID62198;	NULL
436.111	KID64522.1	515	FAD dependent oxidoreductase, partial	MAN_06696	A0A0B4F9W3	A0A0B4F9W3_METAN	unreviewed	FAD dependent oxidoreductase (Fragment)	Metarhizium anisopliae ARSEF 549	515	GO:0004499; GO:0050660; GO:0050661	flavin adenine dinucleotide binding [GO:0050660]; N,N-dimethylaniline monooxygenase activity [GO:0004499]; NADP binding [GO:0050661]	PF00743;	NULL	1 out of 5	NULL	KID64522;	NULL
470.134	KID68290.1	118	hypothetical protein MAN_03146, partial	MAN_03146	A0A0B4F275	A0A0B4F275_METAN	unreviewed	Uncharacterized protein (Fragment)	Metarhizium anisopliae ARSEF 549	118	NULL	NULL	NULL	SIGNAL 1 18 {ECO:0000256|SAM:SignalP}.	1 out of 5	NULL	KID68290;	NULL
690.767	KID63536.1	300	RTA-like protein, partial	MAN_07737	A0A0B4FCE5	A0A0B4FCE5_METAN	unreviewed	RTA-like protein (Fragment)	Metarhizium anisopliae ARSEF 549	300	GO:0006950; GO:0016021	integral component of membrane [GO:0016021]; response to stress [GO:0006950]	PF04479;	NULL	1 out of 5	NULL	KID63536;	NULL
63.9218	KID64273.1	86	hypothetical protein MAN_06447, partial	MAN_06447	A0A0B4F1F1	A0A0B4F1F1_METAN	unreviewed	Uncharacterized protein (Fragment)	Metarhizium anisopliae ARSEF 549	86	NULL	NULL	NULL	NULL	1 out of 5	NULL	KID64273;	NULL
5354.99	KID66087.1	265	Chloroperoxidase, partial	MAN_05746	A0A0B4FDZ2	A0A0B4FDZ2_METAN	unreviewed	Chloroperoxidase (Fragment)	Metarhizium anisopliae ARSEF 549	265	GO:0004601	peroxidase activity [GO:0004601]	PF01328;	NULL	1 out of 5	NULL	KID66087;	NULL
1788.78	KID65312.1	613	kinesin motor domain containing protein, partial	MAN_06323	A0A0B4FC11	A0A0B4FC11_METAN	unreviewed	Kinesin motor domain containing protein (Fragment)	Metarhizium anisopliae ARSEF 549	613	GO:0003777; GO:0005524; GO:0007018; GO:0008017	ATP binding [GO:0005524]; microtubule binding [GO:0008017]; microtubule motor activity [GO:0003777]; microtubule-based movement [GO:0007018]	PF00225;	NULL	1 out of 5	NULL	KID65312;	K10393
22.6819	KID69088.1	341	LPS glycosyltransferase, partial	MAN_01602	A0A0B4FF78	A0A0B4FF78_METAN	unreviewed	LPS glycosyltransferase (Fragment)	Metarhizium anisopliae ARSEF 549	341	GO:0016740	transferase activity [GO:0016740]	NULL	NULL	1 out of 5	NULL	KID69088;	NULL
18.5579	KID60538.1	635	mucoidy inhibitor-like protein, partial	MAN_09673	A0A0B4EQU4	A0A0B4EQU4_METAN	unreviewed	Mucoidy inhibitor-like protein (Fragment)	Metarhizium anisopliae ARSEF 549	635	NULL	NULL	PF13598;PF13600;	NULL	1 out of 5	NULL	KID60538;	NULL
189.703	KID64483.1	496	Major facilitator superfamily transporter, partial	MAN_06657	A0A0B4F223	A0A0B4F223_METAN	unreviewed	Major facilitator superfamily transporter (Fragment)	Metarhizium anisopliae ARSEF 549	496	GO:0016021; GO:0055085	integral component of membrane [GO:0016021]; transmembrane transport [GO:0055085]	PF07690;	NULL	1 out of 5	NULL	KID64483;	NULL
10.31	KID62699.1	344	O-methyl transferase B, partial	MAN_07915	A0A0B4G2M9	A0A0B4G2M9_METAN	unreviewed	O-methyl transferase B (Fragment)	Metarhizium anisopliae ARSEF 549	344	GO:0008171	O-methyltransferase activity [GO:0008171]	PF00891;	NULL	1 out of 5	NULL	KID62699;	K17649
1700.11	KID63325.1	422	benzoate 4-monooxygenase cytochrome P450, partial	MAN_07526	A0A0B4EMN0	A0A0B4EMN0_METAN	unreviewed	Benzoate 4-monooxygenase cytochrome P450 (Fragment)	Metarhizium anisopliae ARSEF 549	422	GO:0004497; GO:0005506; GO:0016705; GO:0020037	heme binding [GO:0020037]; iron ion binding [GO:0005506]; monooxygenase activity [GO:0004497]; oxidoreductase activity, acting on paired donors, with incorporation or reduction of molecular oxygen [GO:0016705]	PF00067;	NULL	1 out of 5	NULL	KID63325;	NULL
49584.7	KID70219.1	155	Blastomyces yeast-phase-specific protein, partial	MAN_02733	A0A0B4GPY9	A0A0B4GPY9_METAN	unreviewed	Blastomyces yeast-phase-specific protein (Fragment)	Metarhizium anisopliae ARSEF 549	155	NULL	NULL	PF04681;	SIGNAL 1 20 {ECO:0000256|SAM:SignalP}.	1 out of 5	NULL	KID70219;	NULL
26428.6	KID63771.1	69	Glucose-repressible protein Grg1, partial	MAN_06942	A0A0B4FD13	A0A0B4FD13_METAN	unreviewed	Glucose-repressible protein Grg1 (Fragment)	Metarhizium anisopliae ARSEF 549	69	NULL	NULL	PF11034;	NULL	1 out of 5	NULL	KID63771;	NULL
8.24797	KID66098.1	1964	non ribosomal peptide synthase, partial	MAN_05757	A0A0B4F6I3	A0A0B4F6I3_METAN	unreviewed	Non ribosomal peptide synthase (Fragment)	Metarhizium anisopliae ARSEF 549	1964	GO:0003824; GO:0008152	catalytic activity [GO:0003824]; metabolic process [GO:0008152]	PF00501;PF13193;PF00668;PF00550;	NULL	1 out of 5	NULL	KID66098;	K22118
59.7978	KID68145.1	200	dienelactone hydrolase family protein, partial	MAN_03001	A0A0B4F1V7	A0A0B4F1V7_METAN	unreviewed	Dienelactone hydrolase family protein (Fragment)	Metarhizium anisopliae ARSEF 549	200	GO:0016787	hydrolase activity [GO:0016787]	PF01738;	SIGNAL 1 19 {ECO:0000256|SAM:SignalP}.	1 out of 5	NULL	KID68145;	NULL
4.12398	KID64386.1	600	Tryptophan halogenase, partial	MAN_06560	A0A0B4FEW2	A0A0B4FEW2_METAN	unreviewed	Tryptophan halogenase (Fragment)	Metarhizium anisopliae ARSEF 549	600	GO:0016491	oxidoreductase activity [GO:0016491]	PF04820;	NULL	1 out of 5	NULL	KID64386;	NULL
3519.82	KID59662.1	1314	multidrug resistance protein, partial	MAN_10468	A0A0B4EVA3	A0A0B4EVA3_METAN	unreviewed	Multidrug resistance protein (Fragment)	Metarhizium anisopliae ARSEF 549	1314	GO:0005524; GO:0016021; GO:0042626	integral component of membrane [GO:0016021]; ATP binding [GO:0005524]; ATPase activity, coupled to transmembrane movement of substances [GO:0042626]	PF00664;PF00005;	NULL	1 out of 5	NULL	KID59662;	K05658
67.0147	KID70406.1	437	amine oxidase (flavin-containing), partial	MAN_00005	A0A0B4FXK2	A0A0B4FXK2_METAN	unreviewed	Amine oxidase (Flavin-containing) (Fragment)	Metarhizium anisopliae ARSEF 549	437	GO:0016491	oxidoreductase activity [GO:0016491]	PF01266;	NULL	1 out of 5	NULL	KID70406;	NULL
1051.62	KID61490.1	172	hypothetical protein MAN_09255, partial	MAN_09255	A0A0B4EH91	A0A0B4EH91_METAN	unreviewed	Uncharacterized protein (Fragment)	Metarhizium anisopliae ARSEF 549	172	NULL	NULL	NULL	SIGNAL 1 16 {ECO:0000256|SAM:SignalP}.	1 out of 5	NULL	KID61490;	NULL
7.21697	KID69408.1	506	Peptidase S28, partial	MAN_01922	A0A0B4FG27	A0A0B4FG27_METAN	unreviewed	Peptidase S28 (Fragment)	Metarhizium anisopliae ARSEF 549	506	GO:0008236	serine-type peptidase activity [GO:0008236]	PF05577;	SIGNAL 1 19 {ECO:0000256|SAM:SignalP}.	1 out of 5	NULL	KID69408;	NULL
217.54	KID64643.1	613	CobW/HypB/UreG, nucleotide-binding domain containing protein, partial	MAN_06817	A0A0B4F2F2	A0A0B4F2F2_METAN	unreviewed	CobW/HypB/UreG, nucleotide-binding domain containing protein (Fragment)	Metarhizium anisopliae ARSEF 549	613	NULL	NULL	PF02492;PF07683;	NULL	1 out of 5	NULL	KID64643;	NULL
669.116	KID67057.1	427	Nucleoside phosphorylase, partial	MAN_03815	A0A0B4FGU4	A0A0B4FGU4_METAN	unreviewed	Nucleoside phosphorylase (Fragment)	Metarhizium anisopliae ARSEF 549	427	GO:0003824; GO:0009116	catalytic activity [GO:0003824]; nucleoside metabolic process [GO:0009116]	PF01048;	NULL	1 out of 5	NULL	KID67057;	NULL
2818.74	KID61330.1	874	SNF2-related protein, partial	MAN_09095	A0A0B4EGR2	A0A0B4EGR2_METAN	unreviewed	SNF2-related protein (Fragment)	Metarhizium anisopliae ARSEF 549	874	GO:0005524	ATP binding [GO:0005524]	PF00271;PF00176;	NULL	1 out of 5	NULL	KID61330;	NULL
37.1159	KID68152.1	602	deuterolysin metalloprotease, partial	MAN_03008	A0A0B4FJW6	A0A0B4FJW6_METAN	unreviewed	Deuterolysin metalloprotease (Fragment)	Metarhizium anisopliae ARSEF 549	602	GO:0004222	metalloendopeptidase activity [GO:0004222]	PF14521;	SIGNAL 1 17 {ECO:0000256|SAM:SignalP}.	1 out of 5	NULL	KID68152;	K19305
131.967	KID62584.1	900	hypothetical protein MAN_07800, partial	MAN_07800	A0A0B4G2C9	A0A0B4G2C9_METAN	unreviewed	Uncharacterized protein (Fragment)	Metarhizium anisopliae ARSEF 549	900	GO:0016021	integral component of membrane [GO:0016021]	NULL	NULL	1 out of 5	NULL	KID62584;	NULL
640.249	KID61536.1	110	ethyl tert-butyl ether degradation EthD, partial	MAN_08775	A0A0B4F6V4	A0A0B4F6V4_METAN	unreviewed	Ethyl tert-butyl ether degradation EthD (Fragment)	Metarhizium anisopliae ARSEF 549	110	NULL	NULL	NULL	NULL	1 out of 5	NULL	KID61536;	NULL
72.1697	KID63975.1	120	TPR Domain containing protein, partial	MAN_07146	A0A0B4EPL8	A0A0B4EPL8_METAN	unreviewed	TPR Domain containing protein (Fragment)	Metarhizium anisopliae ARSEF 549	120	NULL	NULL	PF12770;	NULL	1 out of 5	NULL	KID63975;	NULL
3485.8	KID71944.1	449	phosphatidylserine decarboxylase family protein, partial	MAN_01543	A0A0B4GVG1	A0A0B4GVG1_METAN	unreviewed	Phosphatidylserine decarboxylase family protein (Fragment)	Metarhizium anisopliae ARSEF 549	449	GO:0004609; GO:0008654	phosphatidylserine decarboxylase activity [GO:0004609]; phospholipid biosynthetic process [GO:0008654]	PF02666;PF12588;	NULL	1 out of 5	NULL	KID71944;	K01613
444.359	KID61616.1	499	UDP-galactopyranose mutase, partial	MAN_08855	A0A0B4F715	A0A0B4F715_METAN	unreviewed	UDP-galactopyranose mutase (Fragment)	Metarhizium anisopliae ARSEF 549	499	GO:0016491	oxidoreductase activity [GO:0016491]	PF01593;	NULL	1 out of 5	NULL	KID61616;	NULL
911.401	KID65130.1	469	Ergosterol biosynthesis ERG4/ERG24, partial	MAN_06141	A0A0B4ET87	A0A0B4ET87_METAN	unreviewed	Ergosterol biosynthesis ERG4/ERG24 (Fragment)	Metarhizium anisopliae ARSEF 549	469	GO:0016021; GO:0016628	integral component of membrane [GO:0016021]; oxidoreductase activity, acting on the CH-CH group of donors, NAD or NADP as acceptor [GO:0016628]	PF01222;	NULL	1 out of 5	NULL	KID65130;	K00223
1178.43	KID64269.1	374	Triacylglycerol lipase, partial	MAN_06443	A0A0B4G794	A0A0B4G794_METAN	unreviewed	Triacylglycerol lipase (Fragment)	Metarhizium anisopliae ARSEF 549	374	GO:0006629; GO:0016787	hydrolase activity [GO:0016787]; lipid metabolic process [GO:0006629]	PF01764;	SIGNAL 1 25 {ECO:0000256|SAM:SignalP}.	1 out of 5	NULL	KID64269;	NULL
323.733	KID63542.1	1486	ABC transporter, transmembrane domain, type 1, partial	MAN_07743	A0A0B4F737	A0A0B4F737_METAN	unreviewed	ABC transporter, transmembrane domain, type 1 (Fragment)	Metarhizium anisopliae ARSEF 549	1486	GO:0000770; GO:0005524; GO:0016021; GO:0042626	integral component of membrane [GO:0016021]; ATP binding [GO:0005524]; ATPase activity, coupled to transmembrane movement of substances [GO:0042626]; peptide pheromone export [GO:0000770]	PF00664;PF00005;	NULL	1 out of 5	NULL	KID63542;	NULL
1012.44	KID64208.1	533	cytochrome P450 oxidoreductase OrdA-like protein, partial	MAN_06382	A0A0B4F194	A0A0B4F194_METAN	unreviewed	Cytochrome P450 oxidoreductase OrdA-like protein (Fragment)	Metarhizium anisopliae ARSEF 549	533	GO:0004497; GO:0005506; GO:0016705; GO:0020037	heme binding [GO:0020037]; iron ion binding [GO:0005506]; monooxygenase activity [GO:0004497]; oxidoreductase activity, acting on paired donors, with incorporation or reduction of molecular oxygen [GO:0016705]	PF00067;	NULL	1 out of 5	NULL	KID64208;	NULL
51.5498	KID65616.1	635	DUF1680 domain protein, partial	MAN_05275	A0A0B4FIH2	A0A0B4FIH2_METAN	unreviewed	DUF1680 domain protein (Fragment)	Metarhizium anisopliae ARSEF 549	635	GO:0003824	catalytic activity [GO:0003824]	PF07944;	NULL	1 out of 5	NULL	KID65616;	K09955
1993.95	KID62273.1	203	SCP-like extracellular protein, partial	MAN_08277	A0A0B4EW43	A0A0B4EW43_METAN	unreviewed	SCP-like extracellular protein (Fragment)	Metarhizium anisopliae ARSEF 549	203	GO:0005576; GO:0016021	extracellular region [GO:0005576]; integral component of membrane [GO:0016021]	PF00188;	SIGNAL 1 19 {ECO:0000256|SAM:SignalP}.	1 out of 5	NULL	KID62273;	NULL
27.8369	KID69486.1	130	hypothetical protein MAN_02000, partial	MAN_02000	A0A0B4FUW0	A0A0B4FUW0_METAN	unreviewed	Uncharacterized protein (Fragment)	Metarhizium anisopliae ARSEF 549	130	NULL	NULL	NULL	NULL	1 out of 5	NULL	KID69486;	NULL
3567.25	KID61094.1	646	laccase, partial	MAN_09378	A0A0B4FXV9	A0A0B4FXV9_METAN	unreviewed	Laccase (Fragment)	Metarhizium anisopliae ARSEF 549	646	GO:0005507; GO:0016491	copper ion binding [GO:0005507]; oxidoreductase activity [GO:0016491]	PF00394;PF07731;PF07732;	SIGNAL 1 19 {ECO:0000256|SAM:SignalP}.	1 out of 5	NULL	KID61094;	NULL
194.858	KID67403.1	142	hypothetical protein MAN_04161, partial	MAN_04161	A0A0B4FA03	A0A0B4FA03_METAN	unreviewed	Uncharacterized protein (Fragment)	Metarhizium anisopliae ARSEF 549	142	GO:0016021	integral component of membrane [GO:0016021]	NULL	NULL	1 out of 5	NULL	KID67403;	NULL
178.362	KID61489.1	602	laccase, partial	MAN_09254	A0A0B4FZ09	A0A0B4FZ09_METAN	unreviewed	Laccase (Fragment)	Metarhizium anisopliae ARSEF 549	602	GO:0005507; GO:0016491	copper ion binding [GO:0005507]; oxidoreductase activity [GO:0016491]	PF00394;PF07731;PF07732;	SIGNAL 1 17 {ECO:0000256|SAM:SignalP}.	1 out of 5	NULL	KID61489;	NULL
9.27896	KID61625.1	1780	Ankyrin repeat-containing domain protein, partial	MAN_08864	A0A0B4EHM7	A0A0B4EHM7_METAN	unreviewed	Ankyrin repeat-containing domain protein (Fragment)	Metarhizium anisopliae ARSEF 549	1780	GO:0008270	zinc ion binding [GO:0008270]	PF12796;	NULL	1 out of 5	NULL	KID61625;	NULL
42.2708	KID59702.1	886	ankyrin protein, partial	MAN_10508	A0A0B4EVD9	A0A0B4EVD9_METAN	unreviewed	Ankyrin protein (Fragment)	Metarhizium anisopliae ARSEF 549	886	NULL	NULL	NULL	NULL	1 out of 5	NULL	KID59702;	NULL
9.27896	KID61680.1	1105	NACHT and Ankyrin domain protein, partial	MAN_08919	A0A0B4EHS7	A0A0B4EHS7_METAN	unreviewed	NACHT and Ankyrin domain protein (Fragment)	Metarhizium anisopliae ARSEF 549	1105	NULL	NULL	PF12697;PF12796;	NULL	1 out of 5	NULL	KID61680;	NULL
8.24797	KID61365.1	272	hypothetical protein MAN_09130, partial	MAN_09130	A0A0B4EGV1	A0A0B4EGV1_METAN	unreviewed	Uncharacterized protein (Fragment)	Metarhizium anisopliae ARSEF 549	272	GO:0016021	integral component of membrane [GO:0016021]	NULL	SIGNAL 1 16 {ECO:0000256|SAM:SignalP}.	1 out of 5	NULL	KID61365;	NULL
5619.96	KID61695.1	346	3-ketodihydrosphingosine reductase tsc10, partial	MAN_08934	A0A0B4EHU2	A0A0B4EHU2_METAN	unreviewed	3-ketodihydrosphingosine reductase tsc10 (Fragment)	Metarhizium anisopliae ARSEF 549	346	GO:0016021	integral component of membrane [GO:0016021]	PF00106;	NULL	1 out of 5	NULL	KID61695;	K04708
17584.7	KID62478.1	974	hypothetical protein MAN_08482, partial	MAN_08482	A0A0B4EWR6	A0A0B4EWR6_METAN	unreviewed	Uncharacterized protein (Fragment)	Metarhizium anisopliae ARSEF 549	974	NULL	NULL	NULL	SIGNAL 1 22 {ECO:0000256|SAM:SignalP}.	1 out of 5	NULL	KID62478;	NULL
1694.96	KID70201.1	505	MFS transporter, partial	MAN_02715	A0A0B4FX00	A0A0B4FX00_METAN	unreviewed	MFS transporter (Fragment)	Metarhizium anisopliae ARSEF 549	505	GO:0016021; GO:0055085	integral component of membrane [GO:0016021]; transmembrane transport [GO:0055085]	PF07690;	NULL	1 out of 5	NULL	KID70201;	NULL
114.441	KID63535.1	358	branched-chain-amino-acid aminotransferase 5, partial	MAN_07736	A0A0B4END7	A0A0B4END7_METAN	unreviewed	Branched-chain-amino-acid aminotransferase 5 (Fragment)	Metarhizium anisopliae ARSEF 549	358	GO:0004084; GO:0009081	branched-chain-amino-acid transaminase activity [GO:0004084]; branched-chain amino acid metabolic process [GO:0009081]	PF01063;	NULL	1 out of 5	NULL	KID63535;	K00826
793.867	KID61417.1	260	Protein kinase-like domain protein, partial	MAN_09182	A0A0B4F0P2	A0A0B4F0P2_METAN	unreviewed	Protein kinase-like domain protein (Fragment)	Metarhizium anisopliae ARSEF 549	260	GO:0016301	kinase activity [GO:0016301]	PF01636;	NULL	1 out of 5	NULL	KID61417;	NULL
2687.81	KID68670.1	135	fatty acid-biding protein, partial	MAN_03526	A0A0B4F3G9	A0A0B4F3G9_METAN	unreviewed	Fatty acid-biding protein (Fragment)	Metarhizium anisopliae ARSEF 549	135	GO:0005215; GO:0008289	lipid binding [GO:0008289]; transporter activity [GO:0005215]	PF00061;	NULL	1 out of 5	NULL	KID68670;	K08752
1778.47	KID60070.1	68	hypothetical protein MAN_10100, partial	MAN_10100	A0A0B4ED52	A0A0B4ED52_METAN	unreviewed	Uncharacterized protein (Fragment)	Metarhizium anisopliae ARSEF 549	68	NULL	NULL	NULL	SIGNAL 1 16 {ECO:0000256|SAM:SignalP}.	1 out of 5	NULL	KID60070;	NULL
29.8989	KID61173.1	232	hypothetical protein MAN_09457, partial	MAN_09457	A0A0B4ESQ9	A0A0B4ESQ9_METAN	unreviewed	Uncharacterized protein (Fragment)	Metarhizium anisopliae ARSEF 549	232	GO:0016021	integral component of membrane [GO:0016021]	NULL	NULL	1 out of 5	NULL	KID61173;	NULL
180.424	KID64504.1	499	HET-s/LopB domain protein, partial	MAN_06678	A0A0B4G7Y3	A0A0B4G7Y3_METAN	unreviewed	HET-s/LopB domain protein (Fragment)	Metarhizium anisopliae ARSEF 549	499	GO:0004672; GO:0005524	ATP binding [GO:0005524]; protein kinase activity [GO:0004672]	NULL	NULL	1 out of 5	NULL	KID64504;	NULL
181.455	KID70494.1	219	hypothetical protein MAN_00093, partial	MAN_00093	A0A0B4GQT7	A0A0B4GQT7_METAN	unreviewed	Uncharacterized protein (Fragment)	Metarhizium anisopliae ARSEF 549	219	NULL	NULL	NULL	SIGNAL 1 35 {ECO:0000256|SAM:SignalP}.	1 out of 5	NULL	KID70494;	NULL
274.245	KID71964.1	204	hypothetical protein MAN_01563, partial	MAN_01563	A0A0B4GVI9	A0A0B4GVI9_METAN	unreviewed	Uncharacterized protein (Fragment)	Metarhizium anisopliae ARSEF 549	204	NULL	NULL	NULL	SIGNAL 1 20 {ECO:0000256|SAM:SignalP}.	1 out of 5	NULL	KID71964;	NULL
1481.54	KID61632.1	239	hypothetical protein MAN_08871, partial	MAN_08871	A0A0B4F1B0	A0A0B4F1B0_METAN	unreviewed	Uncharacterized protein (Fragment)	Metarhizium anisopliae ARSEF 549	239	NULL	NULL	NULL	SIGNAL 1 19 {ECO:0000256|SAM:SignalP}.	1 out of 5	NULL	KID61632;	NULL
6395.27	KID67390.1	522	1,2-a-D-mannosidase, partial	MAN_04148	A0A0B4EZJ4	A0A0B4EZJ4_METAN	unreviewed	alpha-1,2-Mannosidase (EC 3.2.1.-) (Fragment)	Metarhizium anisopliae ARSEF 549	522	GO:0004571; GO:0005509; GO:0008152; GO:0016020	membrane [GO:0016020]; calcium ion binding [GO:0005509]; mannosyl-oligosaccharide 1,2-alpha-mannosidase activity [GO:0004571]; metabolic process [GO:0008152]	PF01532;	SIGNAL 1 19 {ECO:0000256|SAM:SignalP}.	2 out of 5	NULL	KID67390;	K01230
344.353	KID70407.1	220	Methyltransferase type 11, partial	MAN_00006	A0A0B4FRQ6	A0A0B4FRQ6_METAN	unreviewed	Methyltransferase type 11 (Fragment)	Metarhizium anisopliae ARSEF 549	220	GO:0008168	methyltransferase activity [GO:0008168]	NULL	NULL	1 out of 5	NULL	KID70407;	NULL
9.27896	KID65022.1	580	hypothetical protein MAN_06033, partial	MAN_06033	A0A0B4FBA7	A0A0B4FBA7_METAN	unreviewed	Uncharacterized protein (Fragment)	Metarhizium anisopliae ARSEF 549	580	GO:0000902	cell morphogenesis [GO:0000902]	NULL	NULL	1 out of 5	NULL	KID65022;	NULL
122.689	KID66099.1	322	thioredoxin reductase, partial	MAN_05758	A0A0B4GCW9	A0A0B4GCW9_METAN	unreviewed	Thioredoxin reductase (Fragment)	Metarhizium anisopliae ARSEF 549	322	GO:0016491	oxidoreductase activity [GO:0016491]	PF07992;	NULL	1 out of 5	NULL	KID66099;	K22124
210.323	KID71550.1	85	hypothetical protein MAN_01149, partial	MAN_01149	A0A0B4FC33	A0A0B4FC33_METAN	unreviewed	Uncharacterized protein (Fragment)	Metarhizium anisopliae ARSEF 549	85	NULL	NULL	NULL	NULL	1 out of 5	NULL	KID71550;	NULL
10.31	KID66248.1	248	hypothetical protein MAN_04529, partial	MAN_04529	A0A0B4F6V1	A0A0B4F6V1_METAN	unreviewed	Uncharacterized protein (Fragment)	Metarhizium anisopliae ARSEF 549	248	NULL	NULL	NULL	SIGNAL 1 18 {ECO:0000256|SAM:SignalP}.	1 out of 5	NULL	KID66248;	NULL
27266.8	KID63444.1	361	D-alanine--D-alanine ligase, partial	MAN_07645	A0A0B4G4T4	A0A0B4G4T4_METAN	unreviewed	D-alanine--D-alanine ligase (Fragment)	Metarhizium anisopliae ARSEF 549	361	GO:0005524; GO:0008716; GO:0046872	ATP binding [GO:0005524]; D-alanine-D-alanine ligase activity [GO:0008716]; metal ion binding [GO:0046872]	PF07478;	NULL	1 out of 5	NULL	KID63444;	NULL
49.4878	KID62620.1	490	Chloramphenicol acetyltransferase-like domain protein, partial	MAN_07836	A0A0B4EKM0	A0A0B4EKM0_METAN	unreviewed	Chloramphenicol acetyltransferase-like domain protein (Fragment)	Metarhizium anisopliae ARSEF 549	490	GO:0016747	transferase activity, transferring acyl groups other than amino-acyl groups [GO:0016747]	PF02458;	NULL	1 out of 5	NULL	KID62620;	NULL
1411.43	KID71962.1	300	hypothetical protein MAN_01561, partial	MAN_01561	A0A0B4FW58	A0A0B4FW58_METAN	unreviewed	Uncharacterized protein (Fragment)	Metarhizium anisopliae ARSEF 549	300	GO:0016021	integral component of membrane [GO:0016021]	NULL	NULL	1 out of 5	NULL	KID71962;	NULL
1222.76	KID61323.1	560	hypothetical protein MAN_09088, partial	MAN_09088	A0A0B4ET72	A0A0B4ET72_METAN	unreviewed	Uncharacterized protein (Fragment)	Metarhizium anisopliae ARSEF 549	560	GO:0016021	integral component of membrane [GO:0016021]	NULL	NULL	1 out of 5	NULL	KID61323;	NULL
7.21697	KID70241.1	271	Trypsin- protease, partial	MAN_02755	A0A0B4FX39	A0A0B4FX39_METAN	unreviewed	Trypsin-protease (Fragment)	Metarhizium anisopliae ARSEF 549	271	GO:0004252	serine-type endopeptidase activity [GO:0004252]	PF00089;	SIGNAL 1 20 {ECO:0000256|SAM:SignalP}.	1 out of 5	NULL	KID70241;	NULL
27.8369	KID69422.1	313	DltD N-terminal domain protein, partial	MAN_01936	A0A0B4FNR5	A0A0B4FNR5_METAN	unreviewed	DltD N-terminal domain protein (Fragment)	Metarhizium anisopliae ARSEF 549	313	NULL	NULL	PF12146;	NULL	1 out of 5	NULL	KID69422;	NULL
22.6819	KID69418.1	403	Glycosyl transferase, family 25, partial	MAN_01932	A0A0B4FG39	A0A0B4FG39_METAN	unreviewed	Glycosyl transferase, family 25 (Fragment)	Metarhizium anisopliae ARSEF 549	403	GO:0016021; GO:0016740	integral component of membrane [GO:0016021]; transferase activity [GO:0016740]	PF01755;	NULL	1 out of 5	NULL	KID69418;	NULL
201.044	KID61693.1	353	hypothetical protein MAN_08932, partial	MAN_08932	A0A0B4EUE1	A0A0B4EUE1_METAN	unreviewed	Uncharacterized protein (Fragment)	Metarhizium anisopliae ARSEF 549	353	GO:0016021	integral component of membrane [GO:0016021]	NULL	NULL	1 out of 5	NULL	KID61693;	NULL
1978.48	KID60543.1	235	ThiJ/PfpI family protein, partial	MAN_09678	A0A0B4EQU8	A0A0B4EQU8_METAN	unreviewed	ThiJ/PfpI family protein (Fragment)	Metarhizium anisopliae ARSEF 549	235	NULL	NULL	PF01965;	NULL	1 out of 5	NULL	KID60543;	NULL
7100.47	KID61419.1	556	Cytochrome P450, partial	MAN_09184	A0A0B4FYT3	A0A0B4FYT3_METAN	unreviewed	Cytochrome P450 (Fragment)	Metarhizium anisopliae ARSEF 549	556	GO:0004497; GO:0005506; GO:0016705; GO:0020037	heme binding [GO:0020037]; iron ion binding [GO:0005506]; monooxygenase activity [GO:0004497]; oxidoreductase activity, acting on paired donors, with incorporation or reduction of molecular oxygen [GO:0016705]	PF00067;	SIGNAL 1 19 {ECO:0000256|SAM:SignalP}.	1 out of 5	NULL	KID61419;	NULL
42.2708	KID70693.1	563	pyruvate decarboxylase, partial	MAN_00292	A0A0B4FJR8	A0A0B4FJR8_METAN	unreviewed	Pyruvate decarboxylase (Fragment)	Metarhizium anisopliae ARSEF 549	563	GO:0000287; GO:0016831; GO:0030976	carboxy-lyase activity [GO:0016831]; magnesium ion binding [GO:0000287]; thiamine pyrophosphate binding [GO:0030976]	PF02775;PF00205;PF02776;	NULL	1 out of 5	NULL	KID70693;	K01568
315.485	KID63161.1	462	Carboxylesterase, type B, partial	MAN_07362	A0A0B4FBK5	A0A0B4FBK5_METAN	unreviewed	Carboxylic ester hydrolase (EC 3.1.1.-) (Fragment)	Metarhizium anisopliae ARSEF 549	462	GO:0016787	hydrolase activity [GO:0016787]	PF00135;	NULL	1 out of 5	NULL	KID63161;	NULL
316.516	KID63976.1	453	TPR Domain containing protein, partial	MAN_07147	A0A0B4FDL3	A0A0B4FDL3_METAN	unreviewed	TPR Domain containing protein (Fragment)	Metarhizium anisopliae ARSEF 549	453	NULL	NULL	NULL	NULL	1 out of 5	NULL	KID63976;	NULL
31.9609	KID70683.1	105	hypothetical protein MAN_00282, partial	MAN_00282	A0A0B4FJR0	A0A0B4FJR0_METAN	unreviewed	Uncharacterized protein (Fragment)	Metarhizium anisopliae ARSEF 549	105	NULL	NULL	NULL	NULL	1 out of 5	NULL	KID70683;	NULL
138.153	KID67060.1	548	Amino acid/polyamine transporter I, partial	MAN_03818	A0A0B4EZ00	A0A0B4EZ00_METAN	unreviewed	Amino acid/polyamine transporter I (Fragment)	Metarhizium anisopliae ARSEF 549	548	GO:0015171; GO:0016021	integral component of membrane [GO:0016021]; amino acid transmembrane transporter activity [GO:0015171]	PF13520;	NULL	1 out of 5	NULL	KID67060;	K19564
448.483	KID66285.1	445	Cytochrome P450, partial	MAN_04566	A0A0B4EWH4	A0A0B4EWH4_METAN	unreviewed	Cytochrome P450 (Fragment)	Metarhizium anisopliae ARSEF 549	445	GO:0005506; GO:0016705; GO:0020037	heme binding [GO:0020037]; iron ion binding [GO:0005506]; oxidoreductase activity, acting on paired donors, with incorporation or reduction of molecular oxygen [GO:0016705]	PF00067;	NULL	1 out of 5	NULL	KID66285;	NULL
436.111	KID70955.1	568	Major facilitator superfamily domain, general substrate transporter, partial	MAN_00554	A0A0B4FA21	A0A0B4FA21_METAN	unreviewed	Major facilitator superfamily domain, general substrate transporter (Fragment)	Metarhizium anisopliae ARSEF 549	568	GO:0016021; GO:0055085	integral component of membrane [GO:0016021]; transmembrane transport [GO:0055085]	PF07690;	NULL	1 out of 5	NULL	KID70955;	NULL
670.147	KID65309.1	473	trichodiene oxygenase, partial	MAN_06320	A0A0B4GAF8	A0A0B4GAF8_METAN	unreviewed	Trichodiene oxygenase (Fragment)	Metarhizium anisopliae ARSEF 549	473	GO:0004497; GO:0005506; GO:0016705; GO:0020037	heme binding [GO:0020037]; iron ion binding [GO:0005506]; monooxygenase activity [GO:0004497]; oxidoreductase activity, acting on paired donors, with incorporation or reduction of molecular oxygen [GO:0016705]	PF00067;	NULL	1 out of 5	NULL	KID65309;	NULL
27.8369	KID59994.1	178	hypothetical protein MAN_10244, partial	MAN_10244	A0A0B4FUT5	A0A0B4FUT5_METAN	unreviewed	Uncharacterized protein (Fragment)	Metarhizium anisopliae ARSEF 549	178	NULL	NULL	NULL	NULL	1 out of 5	NULL	KID59994;	NULL
92.7896	KID61172.1	887	sulfatase domain-containing protein, partial	MAN_09456	A0A0B4EZY3	A0A0B4EZY3_METAN	unreviewed	Sulfatase domain-containing protein (Fragment)	Metarhizium anisopliae ARSEF 549	887	GO:0008152; GO:0008484; GO:0016021	integral component of membrane [GO:0016021]; sulfuric ester hydrolase activity [GO:0008484]; metabolic process [GO:0008152]	PF00884;	NULL	1 out of 5	NULL	KID61172;	NULL
30.9299	KID71224.1	489	Major facilitator superfamily domain, general substrate transporter, partial	MAN_00823	A0A0B4GT24	A0A0B4GT24_METAN	unreviewed	Major facilitator superfamily domain, general substrate transporter (Fragment)	Metarhizium anisopliae ARSEF 549	489	GO:0016021; GO:0055085	integral component of membrane [GO:0016021]; transmembrane transport [GO:0055085]	PF07690;	NULL	1 out of 5	NULL	KID71224;	NULL
329.919	KID65310.1	234	hypothetical protein MAN_06321, partial	MAN_06321	A0A0B4ETQ5	A0A0B4ETQ5_METAN	unreviewed	Uncharacterized protein (Fragment)	Metarhizium anisopliae ARSEF 549	234	NULL	NULL	NULL	NULL	1 out of 5	NULL	KID65310;	NULL
790.774	KID71616.1	709	PIF1 helicase-like protein, partial	MAN_01215	A0A0B4G111	A0A0B4G111_METAN	unreviewed	PIF1 helicase-like protein (Fragment)	Metarhizium anisopliae ARSEF 549	709	GO:0004386	helicase activity [GO:0004386]	PF15456;	NULL	1 out of 5	NULL	KID71616;	NULL
1312.46	KID70852.1	196	extracellular serine-rich protein, partial	MAN_00451	A0A0B4FT16	A0A0B4FT16_METAN	unreviewed	Extracellular serine-rich protein (Fragment)	Metarhizium anisopliae ARSEF 549	196	NULL	NULL	NULL	SIGNAL 1 19 {ECO:0000256|SAM:SignalP}.	1 out of 5	NULL	KID70852;	NULL
7474.72	KID69927.1	199	extracellular serine-rich protein, partial	MAN_02441	A0A0B4FQ84	A0A0B4FQ84_METAN	unreviewed	Extracellular serine-rich protein (Fragment)	Metarhizium anisopliae ARSEF 549	199	NULL	NULL	NULL	SIGNAL 1 20 {ECO:0000256|SAM:SignalP}.	1 out of 5	NULL	KID69927;	NULL
16.4959	KID63543.1	243	capsule polysaccharide biosynthesis protein, partial	MAN_07744	A0A0B4EZL9	A0A0B4EZL9_METAN	unreviewed	Capsule polysaccharide biosynthesis protein (Fragment)	Metarhizium anisopliae ARSEF 549	243	NULL	NULL	NULL	NULL	1 out of 5	NULL	KID63543;	NULL
642.311	KID65122.1	128	hypothetical protein MAN_06133, partial	MAN_06133	A0A0B4FBR3	A0A0B4FBR3_METAN	unreviewed	Uncharacterized protein (Fragment)	Metarhizium anisopliae ARSEF 549	128	NULL	NULL	NULL	SIGNAL 1 16 {ECO:0000256|SAM:SignalP}.	1 out of 5	NULL	KID65122;	NULL
1077.39	KID65949.1	288	amino acid transporter arg-13, partial	MAN_05608	A0A0B4GCB4	A0A0B4GCB4_METAN	unreviewed	Amino acid transporter arg-13 (Fragment)	Metarhizium anisopliae ARSEF 549	288	GO:0006810; GO:0016021	integral component of membrane [GO:0016021]; transport [GO:0006810]	PF00153;	NULL	1 out of 5	NULL	KID65949;	K15114
4242.55	KID64254.1	428	endoglucanase, partial	MAN_06428	A0A0B4G779	A0A0B4G779_METAN	unreviewed	Endoglucanase (Fragment)	Metarhizium anisopliae ARSEF 549	428	NULL	NULL	NULL	NULL	1 out of 5	NULL	KID64254;	NULL
11579.1	KID69724.1	221	hypothetical protein MAN_02238, partial	MAN_02238	A0A0B4GNE0	A0A0B4GNE0_METAN	unreviewed	Uncharacterized protein (Fragment)	Metarhizium anisopliae ARSEF 549	221	GO:0016021	integral component of membrane [GO:0016021]	NULL	NULL	1 out of 5	NULL	KID69724;	NULL
169.083	KID62646.1	1796	DEAD-like helicase, partial	MAN_07862	A0A0B4FA17	A0A0B4FA17_METAN	unreviewed	DEAD-like helicase (Fragment)	Metarhizium anisopliae ARSEF 549	1796	GO:0003676; GO:0004386; GO:0005524	ATP binding [GO:0005524]; helicase activity [GO:0004386]; nucleic acid binding [GO:0003676]	PF00270;PF00271;	NULL	1 out of 5	NULL	KID62646;	K20103
5082.81	KID66086.1	1442	heme peroxidase, animal, partial	MAN_05745	A0A0B4FJW5	A0A0B4FJW5_METAN	unreviewed	Heme peroxidase, animal (Fragment)	Metarhizium anisopliae ARSEF 549	1442	GO:0004601; GO:0006979; GO:0020037; GO:0031408	heme binding [GO:0020037]; peroxidase activity [GO:0004601]; oxylipin biosynthetic process [GO:0031408]; response to oxidative stress [GO:0006979]	PF03098;	NULL	1 out of 5	NULL	KID66086;	NULL
1354.73	KID64388.1	1205	Ankyrin repeat-containing domain protein, partial	MAN_06562	A0A0B4F1S0	A0A0B4F1S0_METAN	unreviewed	Ankyrin repeat-containing domain protein (Fragment)	Metarhizium anisopliae ARSEF 549	1205	GO:0003824; GO:0009116	catalytic activity [GO:0003824]; nucleoside metabolic process [GO:0009116]	PF00023;PF12796;PF01048;	NULL	1 out of 5	NULL	KID64388;	NULL
286.617	KID61492.1	147	secretory phospholipase A2, partial	MAN_09257	A0A0B4F0X0	A0A0B4F0X0_METAN	unreviewed	Secretory phospholipase A2 (Fragment)	Metarhizium anisopliae ARSEF 549	147	GO:0004623; GO:0006644; GO:0050482	phospholipase A2 activity [GO:0004623]; arachidonic acid secretion [GO:0050482]; phospholipid metabolic process [GO:0006644]	PF09056;	NULL	1 out of 5	NULL	KID61492;	NULL
1604.23	KID64938.1	134	Calcium Channel Inhibitor, partial	MAN_05949	A0A0B4F357	A0A0B4F357_METAN	unreviewed	Calcium Channel Inhibitor (Fragment)	Metarhizium anisopliae ARSEF 549	134	GO:0005576; GO:0009405	extracellular region [GO:0005576]; pathogenesis [GO:0009405]	PF09044;	SIGNAL 1 16 {ECO:0000256|SAM:SignalP}.	1 out of 5	NULL	KID64938;	NULL
2555.84	KID62641.1	549	glucose transporter-like protein, partial	MAN_07857	A0A0B4FA12	A0A0B4FA12_METAN	unreviewed	Glucose transporter-like protein (Fragment)	Metarhizium anisopliae ARSEF 549	549	GO:0008643; GO:0016021; GO:0022891	integral component of membrane [GO:0016021]; substrate-specific transmembrane transporter activity [GO:0022891]; carbohydrate transport [GO:0008643]	PF00083;	NULL	1 out of 5	NULL	KID62641;	NULL
381.469	KID69696.1	478	guanine deaminase, partial	MAN_02210	A0A0B4FVH7	A0A0B4FVH7_METAN	unreviewed	Guanine deaminase (Fragment)	Metarhizium anisopliae ARSEF 549	478	GO:0006147; GO:0008270; GO:0008892	guanine deaminase activity [GO:0008892]; zinc ion binding [GO:0008270]; guanine catabolic process [GO:0006147]	PF01979;	NULL	1 out of 5	NULL	KID69696;	K01487
448.483	KID69424.1	579	Major facilitator superfamily domain, general substrate transporter, partial	MAN_01938	A0A0B4GMI0	A0A0B4GMI0_METAN	unreviewed	Major facilitator superfamily domain, general substrate transporter (Fragment)	Metarhizium anisopliae ARSEF 549	579	GO:0016021; GO:0055085	integral component of membrane [GO:0016021]; transmembrane transport [GO:0055085]	PF07690;	NULL	1 out of 5	NULL	KID69424;	NULL
1082.55	KID63324.1	213	amine oxidase, partial	MAN_07525	A0A0B4G4G4	A0A0B4G4G4_METAN	unreviewed	Amine oxidase (Fragment)	Metarhizium anisopliae ARSEF 549	213	GO:0016491	oxidoreductase activity [GO:0016491]	NULL	NULL	1 out of 5	NULL	KID63324;	NULL
10640.9	KID68770.1	277	cell wall glucanosyltransferase Mwg2, partial	MAN_03626	A0A0B4F3Q0	A0A0B4F3Q0_METAN	unreviewed	Cell wall glucanosyltransferase Mwg2 (Fragment)	Metarhizium anisopliae ARSEF 549	277	GO:0004553; GO:0005975; GO:0016740	hydrolase activity, hydrolyzing O-glycosyl compounds [GO:0004553]; transferase activity [GO:0016740]; carbohydrate metabolic process [GO:0005975]	PF00722;	SIGNAL 1 20 {ECO:0000256|SAM:SignalP}.	1 out of 5	NULL	KID68770;	NULL
58.7668	KID71274.1	233	Dihydrofolate reductase, partial	MAN_00873	A0A0B4GT86	A0A0B4GT86_METAN	unreviewed	Dihydrofolate reductase (Fragment)	Metarhizium anisopliae ARSEF 549	233	GO:0004146; GO:0006545; GO:0009165	dihydrofolate reductase activity [GO:0004146]; glycine biosynthetic process [GO:0006545]; nucleotide biosynthetic process [GO:0009165]	PF00186;	NULL	1 out of 5	NULL	KID71274;	K00287
272.183	KID71697.1	540	Zona occludens toxin, partial	MAN_01296	A0A0B4FVF1	A0A0B4FVF1_METAN	unreviewed	Zona occludens toxin (Fragment)	Metarhizium anisopliae ARSEF 549	540	NULL	NULL	NULL	NULL	1 out of 5	NULL	KID71697;	NULL
22864.4	KID65197.1	361	Kelch repeat protein, partial	MAN_06208	A0A0B4FBV8	A0A0B4FBV8_METAN	unreviewed	Kelch repeat protein (Fragment)	Metarhizium anisopliae ARSEF 549	361	NULL	NULL	NULL	NULL	1 out of 5	NULL	KID65197;	NULL
2902.25	KID69412.1	542	Peptidase aspartic, partial	MAN_01926	A0A0B4FNQ3	A0A0B4FNQ3_METAN	unreviewed	Peptidase aspartic (Fragment)	Metarhizium anisopliae ARSEF 549	542	GO:0016021	integral component of membrane [GO:0016021]	PF00026;	SIGNAL 1 28 {ECO:0000256|SAM:SignalP}.	1 out of 5	NULL	KID69412;	NULL
3079.59	KID60619.1	450	Zinc finger, C2H2-type/integrase, DNA-binding protein, partial	MAN_09754	A0A0B4FWJ3	A0A0B4FWJ3_METAN	unreviewed	Zinc finger, C2H2-type/integrase, DNA-binding protein (Fragment)	Metarhizium anisopliae ARSEF 549	450	GO:0003677	DNA binding [GO:0003677]	NULL	NULL	1 out of 5	NULL	KID60619;	NULL
31.9609	KID71055.1	739	Dynamin, GTPase domain protein, partial	MAN_00654	A0A0B4FAF6	A0A0B4FAF6_METAN	unreviewed	Dynamin, GTPase domain protein (Fragment)	Metarhizium anisopliae ARSEF 549	739	GO:0003924; GO:0005525	GTP binding [GO:0005525]; GTPase activity [GO:0003924]	PF01031;PF00350;	NULL	1 out of 5	NULL	KID71055;	NULL
7562.36	KID65011.1	376	Pyridoxal phosphate-dependent transferase, major domain protein, partial	MAN_06022	A0A0B4FGR6	A0A0B4FGR6_METAN	unreviewed	Pyridoxal phosphate-dependent transferase, major domain protein (Fragment)	Metarhizium anisopliae ARSEF 549	376	GO:0009058; GO:0016740; GO:0030170	pyridoxal phosphate binding [GO:0030170]; transferase activity [GO:0016740]; biosynthetic process [GO:0009058]	PF00155;	NULL	1 out of 5	NULL	KID65011;	NULL
37.1159	KID70403.1	645	L-amino acid oxidase, partial	MAN_00002	A0A0B4FIZ1	A0A0B4FIZ1_METAN	unreviewed	L-amino acid oxidase (Fragment)	Metarhizium anisopliae ARSEF 549	645	GO:0016491	oxidoreductase activity [GO:0016491]	PF01593;	NULL	1 out of 5	NULL	KID70403;	NULL
51921	KID60981.1	429	hemeolysin E, partial	MAN_09265	A0A0B4F524	A0A0B4F524_METAN	unreviewed	Hemeolysin E (Fragment)	Metarhizium anisopliae ARSEF 549	429	NULL	NULL	NULL	NULL	1 out of 5	NULL	KID60981;	NULL
3377.54	KID70487.1	246	hypothetical protein MAN_00086, partial	MAN_00086	A0A0B4FRY8	A0A0B4FRY8_METAN	unreviewed	Uncharacterized protein (Fragment)	Metarhizium anisopliae ARSEF 549	246	GO:0016021	integral component of membrane [GO:0016021]	NULL	SIGNAL 1 19 {ECO:0000256|SAM:SignalP}.	1 out of 5	NULL	KID70487;	NULL
10664.6	KID69841.1	259	malate dehydrogenase, partial	MAN_02355	A0A0B4FVX1	A0A0B4FVX1_METAN	unreviewed	Malate dehydrogenase (Fragment)	Metarhizium anisopliae ARSEF 549	259	NULL	NULL	PF11937;	SIGNAL 1 17 {ECO:0000256|SAM:SignalP}.	1 out of 5	NULL	KID69841;	NULL
5136.42	KID65948.1	1473	ABC transporter, partial	MAN_05607	A0A0B4F647	A0A0B4F647_METAN	unreviewed	ABC transporter (Fragment)	Metarhizium anisopliae ARSEF 549	1473	GO:0000770; GO:0005524; GO:0016021; GO:0042626	integral component of membrane [GO:0016021]; ATP binding [GO:0005524]; ATPase activity, coupled to transmembrane movement of substances [GO:0042626]; peptide pheromone export [GO:0000770]	PF00664;PF00005;	NULL	1 out of 5	NULL	KID65948;	NULL
1408.34	KID59895.1	379	hypothetical protein MAN_10347, partial	MAN_10347	A0A0B4ECI4	A0A0B4ECI4_METAN	unreviewed	Uncharacterized protein (Fragment)	Metarhizium anisopliae ARSEF 549	379	GO:0016021	integral component of membrane [GO:0016021]	NULL	NULL	1 out of 5	NULL	KID59895;	NULL
4407.51	KID68771.1	673	MedA, partial	MAN_03627	A0A0B4FST2	A0A0B4FST2_METAN	unreviewed	MedA (Fragment)	Metarhizium anisopliae ARSEF 549	673	NULL	NULL	NULL	NULL	1 out of 5	NULL	KID68771;	NULL
501.064	KID60852.1	487	hypothetical protein MAN_09580, partial	MAN_09580	A0A0B4EYU0	A0A0B4EYU0_METAN	unreviewed	Uncharacterized protein (Fragment)	Metarhizium anisopliae ARSEF 549	487	GO:0016021	integral component of membrane [GO:0016021]	NULL	NULL	1 out of 5	NULL	KID60852;	NULL
744.379	KID61726.1	532	Permease, cytosine/purine, uracil, thiamine, allantoin, partial	MAN_08965	A0A0B4F7A9	A0A0B4F7A9_METAN	unreviewed	Permease, cytosine/purine, uracil, thiamine, allantoin (Fragment)	Metarhizium anisopliae ARSEF 549	532	GO:0005215; GO:0016021; GO:0055085	integral component of membrane [GO:0016021]; transporter activity [GO:0005215]; transmembrane transport [GO:0055085]	PF02133;	NULL	1 out of 5	NULL	KID61726;	NULL
13.4029	KID70557.1	546	Lipopolysaccharide-modifying protein, partial	MAN_00156	A0A0B4FS74	A0A0B4FS74_METAN	unreviewed	Lipopolysaccharide-modifying protein (Fragment)	Metarhizium anisopliae ARSEF 549	546	GO:0016021	integral component of membrane [GO:0016021]	PF05686;	NULL	1 out of 5	NULL	KID70557;	NULL
17207.3	KID69611.1	369	chitinase 18-11, partial	MAN_02125	A0A0B4FV97	A0A0B4FV97_METAN	unreviewed	Chitinase 18-11 (Fragment)	Metarhizium anisopliae ARSEF 549	369	GO:0005975; GO:0008061	chitin binding [GO:0008061]; carbohydrate metabolic process [GO:0005975]	PF00704;	SIGNAL 1 17 {ECO:0000256|SAM:SignalP}.	1 out of 5	NULL	KID69611;	NULL
3068.24	KID64404.1	532	Cytochrome P450, partial	MAN_06578	A0A0B4G7N4	A0A0B4G7N4_METAN	unreviewed	Cytochrome P450 (Fragment)	Metarhizium anisopliae ARSEF 549	532	GO:0004497; GO:0005506; GO:0016021; GO:0016705; GO:0020037	integral component of membrane [GO:0016021]; heme binding [GO:0020037]; iron ion binding [GO:0005506]; monooxygenase activity [GO:0004497]; oxidoreductase activity, acting on paired donors, with incorporation or reduction of molecular oxygen [GO:0016705]	PF00067;	NULL	1 out of 5	NULL	KID64404;	NULL
198.982	KID66284.1	252	hypothetical protein MAN_04565, partial	MAN_04565	A0A0B4GDE4	A0A0B4GDE4_METAN	unreviewed	Uncharacterized protein (Fragment)	Metarhizium anisopliae ARSEF 549	252	GO:0016021	integral component of membrane [GO:0016021]	NULL	NULL	1 out of 5	NULL	KID66284;	NULL
487.661	KID66867.1	343	CheY-like superfamily, partial	MAN_05148	A0A0B4FG63	A0A0B4FG63_METAN	unreviewed	CheY-like superfamily (Fragment)	Metarhizium anisopliae ARSEF 549	343	GO:0000160; GO:0005622	intracellular [GO:0005622]; phosphorelay signal transduction system [GO:0000160]	PF00072;	NULL	1 out of 5	NULL	KID66867;	NULL
1011.41	KID68136.1	477	FAD-binding, type 2, partial	MAN_02992	A0A0B4FQV3	A0A0B4FQV3_METAN	unreviewed	FAD-binding, type 2 (Fragment)	Metarhizium anisopliae ARSEF 549	477	GO:0016614; GO:0050660	flavin adenine dinucleotide binding [GO:0050660]; oxidoreductase activity, acting on CH-OH group of donors [GO:0016614]	PF08031;PF01565;	NULL	1 out of 5	NULL	KID68136;	NULL
3133.2	KID59661.1	500	vacuolar ATP synthase subunit B (V-ATPase 57 kDa subunit), partial	MAN_10467	A0A0B4F1H0	A0A0B4F1H0_METAN	unreviewed	Vacuolar ATP synthase subunit B (V-ATPase 57 kDa subunit) (Fragment)	Metarhizium anisopliae ARSEF 549	500	GO:0005524; GO:0015991; GO:0016820; GO:0033180; GO:0046034	proton-transporting V-type ATPase, V1 domain [GO:0033180]; ATP binding [GO:0005524]; hydrolase activity, acting on acid anhydrides, catalyzing transmembrane movement of substances [GO:0016820]; ATP hydrolysis coupled proton transport [GO:0015991]; ATP metabolic process [GO:0046034]	PF00006;PF02874;	NULL	1 out of 5	NULL	KID59661;	K02147
1089.76	KID65849.1	292	sorbitol utilization protein SOU2, partial	MAN_05508	A0A0B4GC20	A0A0B4GC20_METAN	unreviewed	Sorbitol utilization protein SOU2 (Fragment)	Metarhizium anisopliae ARSEF 549	292	GO:0016491	oxidoreductase activity [GO:0016491]	NULL	NULL	1 out of 5	NULL	KID65849;	K17742
20.6199	KID61082.1	210	DUF946 domain-containing protein, partial	MAN_09366	A0A0B4EZP7	A0A0B4EZP7_METAN	unreviewed	DUF946 domain-containing protein (Fragment)	Metarhizium anisopliae ARSEF 549	210	NULL	NULL	PF06101;	NULL	1 out of 5	NULL	KID61082;	NULL
4115.74	KID59963.1	194	carbohydrate-binding WSC domain protein, partial	MAN_10213	A0A0B4EP04	A0A0B4EP04_METAN	unreviewed	Carbohydrate-binding WSC domain protein (Fragment)	Metarhizium anisopliae ARSEF 549	194	NULL	NULL	NULL	SIGNAL 1 18 {ECO:0000256|SAM:SignalP}.	1 out of 5	NULL	KID59963;	NULL
3630.14	KID70176.1	885	subtilisin-like serine protease PR1C, partial	MAN_02690	A0A0B4FWX4	A0A0B4FWX4_METAN	unreviewed	Subtilisin-like serine protease PR1C (Fragment)	Metarhizium anisopliae ARSEF 549	885	GO:0004252; GO:0005618; GO:0016020	cell wall [GO:0005618]; membrane [GO:0016020]; serine-type endopeptidase activity [GO:0004252]	PF06280;PF02225;PF00082;	SIGNAL 1 19 {ECO:0000256|SAM:SignalP}.	1 out of 5	NULL	KID70176;	NULL
47.4258	KID69401.1	225	Heat shock protein DnaJ, partial	MAN_01915	A0A0B4FUM5	A0A0B4FUM5_METAN	unreviewed	Heat shock protein DnaJ (Fragment)	Metarhizium anisopliae ARSEF 549	225	NULL	NULL	PF00226;	NULL	1 out of 5	NULL	KID69401;	NULL
246.408	KID65564.1	1457	nacht nucleoside triphosphatase, partial	MAN_05223	A0A0B4GBA4	A0A0B4GBA4_METAN	unreviewed	Nacht nucleoside triphosphatase (Fragment)	Metarhizium anisopliae ARSEF 549	1457	GO:0016021	integral component of membrane [GO:0016021]	NULL	NULL	1 out of 5	NULL	KID65564;	NULL
4823	KID71532.1	179	GPI anchored serine-threonine rich protein, partial	MAN_01131	A0A0B4FV03	A0A0B4FV03_METAN	unreviewed	GPI anchored serine-threonine rich protein (Fragment)	Metarhizium anisopliae ARSEF 549	179	NULL	NULL	NULL	SIGNAL 1 17 {ECO:0000256|SAM:SignalP}.	1 out of 5	NULL	KID71532;	NULL
1492.88	KID61692.1	341	capsule polysaccharide biosynthesis protein, partial	MAN_08931	A0A0B4F1G6	A0A0B4F1G6_METAN	unreviewed	Capsule polysaccharide biosynthesis protein (Fragment)	Metarhizium anisopliae ARSEF 549	341	NULL	NULL	NULL	SIGNAL 1 23 {ECO:0000256|SAM:SignalP}.	1 out of 5	NULL	KID61692;	NULL
40.2088	KID69423.1	503	Cytochrome P450 family protein, partial	MAN_01937	A0A0B4FG42	A0A0B4FG42_METAN	unreviewed	Cytochrome P450 family protein (Fragment)	Metarhizium anisopliae ARSEF 549	503	GO:0005506; GO:0016021; GO:0016705; GO:0020037	integral component of membrane [GO:0016021]; heme binding [GO:0020037]; iron ion binding [GO:0005506]; oxidoreductase activity, acting on paired donors, with incorporation or reduction of molecular oxygen [GO:0016705]	PF00067;	NULL	1 out of 5	NULL	KID69423;	NULL
6888.08	KID68172.1	532	Pyridoxal phosphate-dependent decarboxylase, partial	MAN_03028	A0A0B4FJY5	A0A0B4FJY5_METAN	unreviewed	Pyridoxal phosphate-dependent decarboxylase (Fragment)	Metarhizium anisopliae ARSEF 549	532	GO:0016831; GO:0019752; GO:0030170	carboxy-lyase activity [GO:0016831]; pyridoxal phosphate binding [GO:0030170]; carboxylic acid metabolic process [GO:0019752]	PF00282;	NULL	1 out of 5	NULL	KID68172;	K01580
19321.9	KID63755.1	186	hypothetical protein MAN_06926, partial	MAN_06926	A0A0B4ENW6	A0A0B4ENW6_METAN	unreviewed	Uncharacterized protein (Fragment)	Metarhizium anisopliae ARSEF 549	186	NULL	NULL	NULL	SIGNAL 1 16 {ECO:0000256|SAM:SignalP}.	1 out of 5	NULL	KID63755;	NULL
115.472	KID67061.1	255	NAD(P)-binding domain protein, partial	MAN_03819	A0A0B4FMY8	A0A0B4FMY8_METAN	unreviewed	NAD(P)-binding domain protein (Fragment)	Metarhizium anisopliae ARSEF 549	255	GO:0008678; GO:0051287	2-deoxy-D-gluconate 3-dehydrogenase activity [GO:0008678]; NAD binding [GO:0051287]	NULL	NULL	1 out of 5	NULL	KID67061;	K00065
156.711	KID59553.1	679	Ribonuclease H-like protein, partial	MAN_10597	A0A0B4EMV6	A0A0B4EMV6_METAN	unreviewed	Ribonuclease H-like protein (Fragment)	Metarhizium anisopliae ARSEF 549	679	GO:0003676; GO:0046983	nucleic acid binding [GO:0003676]; protein dimerization activity [GO:0046983]	PF05699;	NULL	1 out of 5	NULL	KID59553;	NULL
1736.2	KID61493.1	512	arginyl-tRNA synthetase, partial	MAN_09258	A0A0B4ETU1	A0A0B4ETU1_METAN	unreviewed	Arginyl-tRNA synthetase (Fragment)	Metarhizium anisopliae ARSEF 549	512	GO:0004814; GO:0005524; GO:0006420	arginine-tRNA ligase activity [GO:0004814]; ATP binding [GO:0005524]; arginyl-tRNA aminoacylation [GO:0006420]	PF05746;PF00750;	NULL	1 out of 5	NULL	KID61493;	K01887
2174.37	KID67334.1	328	hypothetical protein MAN_04092, partial	MAN_04092	A0A0B4GGD1	A0A0B4GGD1_METAN	unreviewed	Uncharacterized protein (Fragment)	Metarhizium anisopliae ARSEF 549	328	GO:0016021	integral component of membrane [GO:0016021]	NULL	SIGNAL 1 27 {ECO:0000256|SAM:SignalP}.	1 out of 5	NULL	KID67334;	NULL
31.9609	KID69213.1	362	NmrA family protein, partial	MAN_01727	A0A0B4FFH9	A0A0B4FFH9_METAN	unreviewed	NmrA family protein (Fragment)	Metarhizium anisopliae ARSEF 549	362	NULL	NULL	PF05368;	NULL	1 out of 5	NULL	KID69213;	NULL
3652.82	KID67548.1	127	hypothetical protein MAN_04306, partial	MAN_04306	A0A0B4FAI4	A0A0B4FAI4_METAN	unreviewed	Uncharacterized protein (Fragment)	Metarhizium anisopliae ARSEF 549	127	NULL	NULL	NULL	NULL	1 out of 5	NULL	KID67548;	NULL
2067.15	KID63326.1	391	hypothetical protein MAN_07527, partial	MAN_07527	A0A0B4FBW1	A0A0B4FBW1_METAN	unreviewed	Uncharacterized protein (Fragment)	Metarhizium anisopliae ARSEF 549	391	GO:0016021	integral component of membrane [GO:0016021]	NULL	NULL	1 out of 5	NULL	KID63326;	NULL
1270.19	KID66036.1	279	methyltransferase type 12, partial	MAN_05695	A0A0B4FJS4	A0A0B4FJS4_METAN	unreviewed	Methyltransferase type 12 (Fragment)	Metarhizium anisopliae ARSEF 549	279	GO:0008168	methyltransferase activity [GO:0008168]	NULL	NULL	1 out of 5	NULL	KID66036;	NULL
389.717	KID69771.1	233	glycine-rich cell wall structural protein 1, partial	MAN_02285	A0A0B4FVQ0	A0A0B4FVQ0_METAN	unreviewed	Glycine-rich cell wall structural protein 1 (Fragment)	Metarhizium anisopliae ARSEF 549	233	NULL	NULL	NULL	NULL	1 out of 5	NULL	KID69771;	NULL
351.57	KID59700.1	444	UPF0075 domain protein, partial	MAN_10506	A0A0B4EBX0	A0A0B4EBX0_METAN	unreviewed	UPF0075 domain protein (Fragment)	Metarhizium anisopliae ARSEF 549	444	GO:0005524; GO:0006040; GO:0009254; GO:0016773	ATP binding [GO:0005524]; phosphotransferase activity, alcohol group as acceptor [GO:0016773]; amino sugar metabolic process [GO:0006040]; peptidoglycan turnover [GO:0009254]	PF03702;	NULL	1 out of 5	NULL	KID59700;	NULL
101.038	KID65342.1	792	HypA, partial	MAN_06353	A0A0B4FC26	A0A0B4FC26_METAN	unreviewed	HypA (Fragment)	Metarhizium anisopliae ARSEF 549	792	NULL	NULL	PF14027;	NULL	1 out of 5	NULL	KID65342;	NULL
1059.86	KID61725.1	356	UbiD family decarboxylase, partial	MAN_08964	A0A0B4EHW7	A0A0B4EHW7_METAN	unreviewed	UbiD family decarboxylase (Fragment)	Metarhizium anisopliae ARSEF 549	356	GO:0016021	integral component of membrane [GO:0016021]	NULL	NULL	1 out of 5	NULL	KID61725;	NULL
1298.02	KID63432.1	219	hypothetical protein MAN_07633, partial	MAN_07633	A0A0B4F6L9	A0A0B4F6L9_METAN	unreviewed	Uncharacterized protein (Fragment)	Metarhizium anisopliae ARSEF 549	219	NULL	NULL	PF14478;	NULL	1 out of 5	NULL	KID63432;	NULL
2588.83	KID67235.1	422	aldose 1-epimerase, partial	MAN_03993	A0A0B4EZC7	A0A0B4EZC7_METAN	unreviewed	Aldose 1-epimerase (Fragment)	Metarhizium anisopliae ARSEF 549	422	GO:0005975; GO:0016853; GO:0030246	carbohydrate binding [GO:0030246]; isomerase activity [GO:0016853]; carbohydrate metabolic process [GO:0005975]	PF01263;	SIGNAL 1 22 {ECO:0000256|SAM:SignalP}.	1 out of 5	NULL	KID67235;	K01785
287.648	KID60802.1	270	Gpr1 family protein, partial	MAN_09530	A0A0B4EYP0	A0A0B4EYP0_METAN	unreviewed	Gpr1 family protein (Fragment)	Metarhizium anisopliae ARSEF 549	270	GO:0016021	integral component of membrane [GO:0016021]	PF01184;	NULL	1 out of 5	NULL	KID60802;	K07034
1888.78	KID68033.1	345	hypothetical protein MAN_02889, partial	MAN_02889	A0A0B4FC39	A0A0B4FC39_METAN	unreviewed	Uncharacterized protein (Fragment)	Metarhizium anisopliae ARSEF 549	345	NULL	NULL	NULL	NULL	1 out of 5	NULL	KID68033;	NULL
248.47	KID68143.1	192	hypothetical protein MAN_02999, partial	MAN_02999	A0A0B4FCC4	A0A0B4FCC4_METAN	unreviewed	Uncharacterized protein (Fragment)	Metarhizium anisopliae ARSEF 549	192	NULL	NULL	NULL	NULL	1 out of 5	NULL	KID68143;	NULL
6165.36	KID65106.1	743	neutral ceramidase precursor, partial	MAN_06117	A0A0B4FH27	A0A0B4FH27_METAN	unreviewed	Neutral ceramidase (Fragment)	Metarhizium anisopliae ARSEF 549	743	NULL	NULL	PF04734;PF17048;	SIGNAL 1 26 {ECO:0000256|SAM:SignalP}.	1 out of 5	NULL	KID65106;	K12349
282.493	KID65174.1	403	hypothetical protein MAN_06185, partial	MAN_06185	A0A0B4GA06	A0A0B4GA06_METAN	unreviewed	Uncharacterized protein (Fragment)	Metarhizium anisopliae ARSEF 549	403	GO:0016021	integral component of membrane [GO:0016021]	NULL	NULL	1 out of 5	NULL	KID65174;	NULL
20.6199	KID66112.1	481	monoamine oxidase N, partial	MAN_05771	A0A0B4FE16	A0A0B4FE16_METAN	unreviewed	Amine oxidase (EC 1.4.3.-) (Fragment)	Metarhizium anisopliae ARSEF 549	481	GO:0016491	oxidoreductase activity [GO:0016491]	PF01593;	NULL	1 out of 5	NULL	KID66112;	NULL
324.764	KID71284.1	327	hypothetical protein MAN_00883, partial	MAN_00883	A0A0B4GT98	A0A0B4GT98_METAN	unreviewed	Uncharacterized protein (Fragment)	Metarhizium anisopliae ARSEF 549	327	GO:0016021	integral component of membrane [GO:0016021]	NULL	NULL	1 out of 5	NULL	KID71284;	NULL
12.372	KID65175.1	137	phosphomannose isomerase, partial	MAN_06186	A0A0B4ETC7	A0A0B4ETC7_METAN	unreviewed	Phosphomannose isomerase (Fragment)	Metarhizium anisopliae ARSEF 549	137	GO:0016853	isomerase activity [GO:0016853]	NULL	NULL	1 out of 5	NULL	KID65175;	NULL
27.8369	KID64061.1	254	WSC domain protein, partial	MAN_07232	A0A0B4FE07	A0A0B4FE07_METAN	unreviewed	WSC domain protein (Fragment)	Metarhizium anisopliae ARSEF 549	254	NULL	NULL	PF01822;	NULL	1 out of 5	NULL	KID64061;	NULL
509.312	KID64484.1	1466	Ankyrin repeat-containing domain protein, partial	MAN_06658	A0A0B4G7W1	A0A0B4G7W1_METAN	unreviewed	Ankyrin repeat-containing domain protein (Fragment)	Metarhizium anisopliae ARSEF 549	1466	GO:0003824; GO:0009116	catalytic activity [GO:0003824]; nucleoside metabolic process [GO:0009116]	PF00023;PF12796;	NULL	1 out of 5	NULL	KID64484;	NULL
2283.66	KID69585.1	323	hypothetical protein MAN_02099, partial	MAN_02099	A0A0B4F694	A0A0B4F694_METAN	unreviewed	Uncharacterized protein (Fragment)	Metarhizium anisopliae ARSEF 549	323	NULL	NULL	NULL	NULL	1 out of 5	NULL	KID69585;	NULL
919.649	KID69217.1	220	hypothetical protein MAN_01731, partial	MAN_01731	A0A0B4FN40	A0A0B4FN40_METAN	unreviewed	Uncharacterized protein (Fragment)	Metarhizium anisopliae ARSEF 549	220	NULL	NULL	NULL	NULL	1 out of 5	NULL	KID69217;	NULL
150.525	KID68192.1	628	Ankyrin repeat-containing domain protein, partial	MAN_03048	A0A0B4FK04	A0A0B4FK04_METAN	unreviewed	Ankyrin repeat-containing domain protein (Fragment)	Metarhizium anisopliae ARSEF 549	628	NULL	NULL	PF12796;PF06985;	NULL	1 out of 5	NULL	KID68192;	NULL
91.7587	KID59208.1	617	Ribonuclease H-like protein, partial	MAN_10841	A0A0B4ELP9	A0A0B4ELP9_METAN	unreviewed	Ribonuclease H-like protein (Fragment)	Metarhizium anisopliae ARSEF 549	617	GO:0003676; GO:0046983	nucleic acid binding [GO:0003676]; protein dimerization activity [GO:0046983]	PF05699;	NULL	1 out of 5	NULL	KID59208;	NULL
360.849	KID61090.1	137	conidial pigment polyketide synthase PksP/Alb1, partial	MAN_09374	A0A0B4EG35	A0A0B4EG35_METAN	unreviewed	Conidial pigment polyketide synthase PksP/Alb1 (Fragment)	Metarhizium anisopliae ARSEF 549	137	NULL	NULL	PF07110;	NULL	1 out of 5	NULL	KID61090;	NULL
1598.04	KID62581.1	208	hypothetical protein MAN_07797, partial	MAN_07797	A0A0B4F9X5	A0A0B4F9X5_METAN	unreviewed	Uncharacterized protein (Fragment)	Metarhizium anisopliae ARSEF 549	208	GO:0016021	integral component of membrane [GO:0016021]	NULL	NULL	1 out of 5	NULL	KID62581;	NULL
2819.77	KID65272.1	545	Major facilitator superfamily domain, general substrate transporter, partial	MAN_06283	A0A0B4FBZ5	A0A0B4FBZ5_METAN	unreviewed	Major facilitator superfamily domain, general substrate transporter (Fragment)	Metarhizium anisopliae ARSEF 549	545	GO:0016021; GO:0055085	integral component of membrane [GO:0016021]; transmembrane transport [GO:0055085]	PF07690;	NULL	1 out of 5	NULL	KID65272;	NULL
3085.77	KID60336.1	1019	beta-galactosidase, partial	MAN_09869	A0A0B4F399	A0A0B4F399_METAN	unreviewed	Beta-galactosidase (EC 3.2.1.23) (Fragment)	Metarhizium anisopliae ARSEF 549	1019	GO:0004565; GO:0005975	beta-galactosidase activity [GO:0004565]; carbohydrate metabolic process [GO:0005975]	PF10435;PF13363;PF13364;PF01301;	SIGNAL 1 17 {ECO:0000256|SAM:SignalP}.	2 out of 5	NULL	KID60336;	NULL
4506.48	KID64941.1	237	hypothetical protein MAN_05952, partial	MAN_05952	A0A0B4FGH9	A0A0B4FGH9_METAN	unreviewed	Uncharacterized protein (Fragment)	Metarhizium anisopliae ARSEF 549	237	NULL	NULL	NULL	NULL	1 out of 5	NULL	KID64941;	NULL
897.998	KID65758.1	282	hypothetical protein MAN_05417, partial	MAN_05417	A0A0B4F5K5	A0A0B4F5K5_METAN	unreviewed	Uncharacterized protein (Fragment)	Metarhizium anisopliae ARSEF 549	282	NULL	NULL	PF13826;	NULL	1 out of 5	NULL	KID65758;	NULL
943.361	KID69406.1	435	Glycosyltransferase, DXD sugar-binding motif protein, partial	MAN_01920	A0A0B4FUN0	A0A0B4FUN0_METAN	unreviewed	Glycosyltransferase, DXD sugar-binding motif protein (Fragment)	Metarhizium anisopliae ARSEF 549	435	GO:0016740	transferase activity [GO:0016740]	PF04488;	NULL	1 out of 5	NULL	KID69406;	NULL
189.703	KID69420.1	2412	Beta-ketoacyl synthase, partial	MAN_01934	A0A0B4F5N8	A0A0B4F5N8_METAN	unreviewed	Beta-ketoacyl synthase (Fragment)	Metarhizium anisopliae ARSEF 549	2412	GO:0016491; GO:0031177	oxidoreductase activity [GO:0016491]; phosphopantetheine binding [GO:0031177]	PF00698;PF08240;PF16197;PF00109;PF02801;PF08659;PF00550;PF14765;	NULL	1 out of 5	NULL	KID69420;	NULL
659.837	KID68106.1	289	transmembrane alpha-helix domain-containing protein, partial	MAN_02962	A0A0B4FQS6	A0A0B4FQS6_METAN	unreviewed	Transmembrane alpha-helix domain-containing protein (Fragment)	Metarhizium anisopliae ARSEF 549	289	GO:0016021	integral component of membrane [GO:0016021]	NULL	NULL	1 out of 5	NULL	KID68106;	NULL
122.689	KID70404.1	590	cyclopentanone 1,2-monooxygenase, partial	MAN_00003	A0A0B4GQI7	A0A0B4GQI7_METAN	unreviewed	Cyclopentanone 1,2-monooxygenase (Fragment)	Metarhizium anisopliae ARSEF 549	590	GO:0004497	monooxygenase activity [GO:0004497]	PF07992;	NULL	1 out of 5	NULL	KID70404;	NULL
1326.89	KID67501.1	622	glycoside hydrolase, partial	MAN_04259	A0A0B4FP68	A0A0B4FP68_METAN	unreviewed	Glycoside hydrolase (Fragment)	Metarhizium anisopliae ARSEF 549	622	GO:0004553; GO:0005975	hydrolase activity, hydrolyzing O-glycosyl compounds [GO:0004553]; carbohydrate metabolic process [GO:0005975]	PF00232;	SIGNAL 1 20 {ECO:0000256|SAM:SignalP}.	1 out of 5	NULL	KID67501;	NULL
493.847	KID66306.1	349	NAD(P)-binding domain protein, partial	MAN_04587	A0A0B4FKF3	A0A0B4FKF3_METAN	unreviewed	NAD(P)-binding domain protein (Fragment)	Metarhizium anisopliae ARSEF 549	349	GO:0016021	integral component of membrane [GO:0016021]	PF00106;	NULL	1 out of 5	NULL	KID66306;	NULL
1148.53	KID69760.1	220	RNA recognition motif containing protein, partial	MAN_02274	A0A0B4F6P2	A0A0B4F6P2_METAN	unreviewed	RNA recognition motif containing protein (Fragment)	Metarhizium anisopliae ARSEF 549	220	NULL	NULL	NULL	NULL	1 out of 5	NULL	KID69760;	NULL
433.018	KID71646.1	531	C2H2 finger domain-containing protein, partial	MAN_01245	A0A0B4G140	A0A0B4G140_METAN	unreviewed	C2H2 finger domain-containing protein (Fragment)	Metarhizium anisopliae ARSEF 549	531	NULL	NULL	NULL	NULL	1 out of 5	NULL	KID71646;	NULL
968.105	KID63322.1	443	Major facilitator superfamily domain, general substrate transporter, partial	MAN_07523	A0A0B4F697	A0A0B4F697_METAN	unreviewed	Major facilitator superfamily domain, general substrate transporter (Fragment)	Metarhizium anisopliae ARSEF 549	443	GO:0016021; GO:0055085	integral component of membrane [GO:0016021]; transmembrane transport [GO:0055085]	PF07690;	NULL	1 out of 5	NULL	KID63322;	NULL
74.2317	KID59954.1	446	MFS transporter, partial	MAN_10204	A0A0B4FUP4	A0A0B4FUP4_METAN	unreviewed	MFS transporter (Fragment)	Metarhizium anisopliae ARSEF 549	446	GO:0016021; GO:0055085	integral component of membrane [GO:0016021]; transmembrane transport [GO:0055085]	PF07690;	NULL	1 out of 5	NULL	KID59954;	NULL
153.618	KID59701.1	499	General substrate transporter, partial	MAN_10507	A0A0B4F1K2	A0A0B4F1K2_METAN	unreviewed	General substrate transporter (Fragment)	Metarhizium anisopliae ARSEF 549	499	GO:0016021; GO:0022857	integral component of membrane [GO:0016021]; transmembrane transporter activity [GO:0022857]	PF00083;	NULL	1 out of 5	NULL	KID59701;	NULL
1972.3	KID59684.1	445	hypothetical protein MAN_10490, partial	MAN_10490	A0A0B4FTW1	A0A0B4FTW1_METAN	unreviewed	Uncharacterized protein (Fragment)	Metarhizium anisopliae ARSEF 549	445	GO:0016021	integral component of membrane [GO:0016021]	PF12505;	NULL	1 out of 5	NULL	KID59684;	NULL
43.3018	KID67411.1	433	cyclopropane-fatty-acyl-phospholipid synthase, partial	MAN_04169	A0A0B4FNX5	A0A0B4FNX5_METAN	unreviewed	Cyclopropane-fatty-acyl-phospholipid synthase (Fragment)	Metarhizium anisopliae ARSEF 549	433	GO:0008610	lipid biosynthetic process [GO:0008610]	PF02353;	NULL	1 out of 5	NULL	KID67411;	K20238
247.439	KID67079.1	250	hypothetical protein MAN_03837, partial	MAN_03837	A0A0B4GFV3	A0A0B4GFV3_METAN	unreviewed	Uncharacterized protein (Fragment)	Metarhizium anisopliae ARSEF 549	250	NULL	NULL	NULL	NULL	1 out of 5	NULL	KID67079;	NULL
193.827	KID71645.1	388	hypothetical protein MAN_01244, partial	MAN_01244	A0A0B4FCA3	A0A0B4FCA3_METAN	unreviewed	Uncharacterized protein (Fragment)	Metarhizium anisopliae ARSEF 549	388	NULL	NULL	NULL	NULL	1 out of 5	NULL	KID71645;	NULL
2106.33	KID71098.1	542	RNA binding protein MSSP-2, partial	MAN_00697	A0A0B4FKZ5	A0A0B4FKZ5_METAN	unreviewed	RNA binding protein MSSP-2 (Fragment)	Metarhizium anisopliae ARSEF 549	542	GO:0003723	RNA binding [GO:0003723]	PF00076;	NULL	1 out of 5	NULL	KID71098;	NULL
279.4	KID62632.1	544	Cytochrome P450, partial	MAN_07848	A0A0B4F4D7	A0A0B4F4D7_METAN	unreviewed	Cytochrome P450 (Fragment)	Metarhizium anisopliae ARSEF 549	544	GO:0004497; GO:0005506; GO:0016021; GO:0016705; GO:0020037	integral component of membrane [GO:0016021]; heme binding [GO:0020037]; iron ion binding [GO:0005506]; monooxygenase activity [GO:0004497]; oxidoreductase activity, acting on paired donors, with incorporation or reduction of molecular oxygen [GO:0016705]	PF00067;	NULL	1 out of 5	NULL	KID62632;	NULL
2037.25	KID69303.1	182	hypothetical protein MAN_01817, partial	MAN_01817	A0A0B4FFS3	A0A0B4FFS3_METAN	unreviewed	Uncharacterized protein (Fragment)	Metarhizium anisopliae ARSEF 549	182	NULL	NULL	PF16541;	SIGNAL 1 21 {ECO:0000256|SAM:SignalP}.	1 out of 5	NULL	KID69303;	NULL
7.21697	KID60017.1	144	Ribosomal protein S12/S23, partial	MAN_10267	A0A0B4EWD5	A0A0B4EWD5_METAN	unreviewed	Ribosomal protein S12/S23 (Fragment)	Metarhizium anisopliae ARSEF 549	144	GO:0003735; GO:0006412; GO:0015935	small ribosomal subunit [GO:0015935]; structural constituent of ribosome [GO:0003735]; translation [GO:0006412]	PF00164;	NULL	1 out of 5	NULL	KID60017;	K02973
77.3247	KID68150.1	1158	hypothetical protein MAN_03006, partial	MAN_03006	A0A0B4F1W0	A0A0B4F1W0_METAN	unreviewed	Uncharacterized protein (Fragment)	Metarhizium anisopliae ARSEF 549	1158	GO:0016021	integral component of membrane [GO:0016021]	NULL	NULL	1 out of 5	NULL	KID68150;	NULL
1731.04	KID69086.1	1383	ABC transporter, partial	MAN_01600	A0A0B4FTS2	A0A0B4FTS2_METAN	unreviewed	ABC transporter (Fragment)	Metarhizium anisopliae ARSEF 549	1383	GO:0000770; GO:0005524; GO:0016021; GO:0042626	integral component of membrane [GO:0016021]; ATP binding [GO:0005524]; ATPase activity, coupled to transmembrane movement of substances [GO:0042626]; peptide pheromone export [GO:0000770]	PF00664;PF00005;	SIGNAL 1 21 {ECO:0000256|SAM:SignalP}.	1 out of 5	NULL	KID69086;	NULL
19126	KID68002.1	453	hypothetical protein MAN_02858, partial	MAN_02858	A0A0B4FJG0	A0A0B4FJG0_METAN	unreviewed	Uncharacterized protein (Fragment)	Metarhizium anisopliae ARSEF 549	453	NULL	NULL	NULL	SIGNAL 1 16 {ECO:0000256|SAM:SignalP}.	1 out of 5	NULL	KID68002;	NULL
3621.89	KID68098.1	374	catalytic protein, partial	MAN_02954	A0A0B4FC86	A0A0B4FC86_METAN	unreviewed	Catalytic protein (Fragment)	Metarhizium anisopliae ARSEF 549	374	NULL	NULL	PF12697;	SIGNAL 1 16 {ECO:0000256|SAM:SignalP}.	1 out of 5	NULL	KID68098;	NULL
1112.44	KID69897.1	251	Protein kinase-like domain protein, partial	MAN_02411	A0A0B4FQ52	A0A0B4FQ52_METAN	unreviewed	Protein kinase-like domain protein (Fragment)	Metarhizium anisopliae ARSEF 549	251	GO:0016301	kinase activity [GO:0016301]	NULL	NULL	1 out of 5	NULL	KID69897;	NULL
90.7277	KID62548.1	280	Protein kinase-like domain protein, partial	MAN_07764	A0A0B4EWZ2	A0A0B4EWZ2_METAN	unreviewed	Protein kinase-like domain protein (Fragment)	Metarhizium anisopliae ARSEF 549	280	GO:0005524; GO:0016020; GO:0016301; GO:0016773	membrane [GO:0016020]; ATP binding [GO:0005524]; kinase activity [GO:0016301]; phosphotransferase activity, alcohol group as acceptor [GO:0016773]	PF06293;	NULL	1 out of 5	NULL	KID62548;	NULL
994.911	KID67635.1	1035	hypothetical protein MAN_04393, partial	MAN_04393	A0A0B4F0C2	A0A0B4F0C2_METAN	unreviewed	Uncharacterized protein (Fragment)	Metarhizium anisopliae ARSEF 549	1035	NULL	NULL	NULL	NULL	1 out of 5	NULL	KID67635;	NULL
71.1387	KID61156.1	378	CFEM domain-containing protein, partial	MAN_09440	A0A0B4F5L5	A0A0B4F5L5_METAN	unreviewed	CFEM domain-containing protein (Fragment)	Metarhizium anisopliae ARSEF 549	378	GO:0016021	integral component of membrane [GO:0016021]	NULL	NULL	1 out of 5	NULL	KID61156;	NULL
6689.1	KID60980.1	762	hypothetical protein MAN_09264, partial	MAN_09264	A0A0B4EFQ8	A0A0B4EFQ8_METAN	unreviewed	Uncharacterized protein (Fragment)	Metarhizium anisopliae ARSEF 549	762	NULL	NULL	NULL	NULL	1 out of 5	NULL	KID60980;	NULL
170.114	KID61011.1	506	choline transport protein, partial	MAN_09295	A0A0B4F563	A0A0B4F563_METAN	unreviewed	Choline transport protein (Fragment)	Metarhizium anisopliae ARSEF 549	506	GO:0015171; GO:0016021	integral component of membrane [GO:0016021]; amino acid transmembrane transporter activity [GO:0015171]	PF13520;	NULL	1 out of 5	NULL	KID61011;	K19564
3291.97	KID59695.1	745	hypothetical protein MAN_10501, partial	MAN_10501	A0A0B4EBW5	A0A0B4EBW5_METAN	unreviewed	Uncharacterized protein (Fragment)	Metarhizium anisopliae ARSEF 549	745	NULL	NULL	NULL	NULL	1 out of 5	NULL	KID59695;	NULL
1903.22	KID70989.1	481	sun, partial	MAN_00588	A0A0B4GSB3	A0A0B4GSB3_METAN	unreviewed	Sun (Fragment)	Metarhizium anisopliae ARSEF 549	481	NULL	NULL	PF03856;	SIGNAL 1 22 {ECO:0000256|SAM:SignalP}.	1 out of 5	NULL	KID70989;	NULL
2036.22	KID68011.1	140	hypothetical protein MAN_02867, partial	MAN_02867	A0A0B4FQK0	A0A0B4FQK0_METAN	unreviewed	Uncharacterized protein (Fragment)	Metarhizium anisopliae ARSEF 549	140	NULL	NULL	NULL	SIGNAL 1 18 {ECO:0000256|SAM:SignalP}.	1 out of 5	NULL	KID68011;	NULL
14208.2	KID62040.1	283	hypothetical protein MAN_08719, partial	MAN_08719	A0A0B4EIY2	A0A0B4EIY2_METAN	unreviewed	Uncharacterized protein (Fragment)	Metarhizium anisopliae ARSEF 549	283	GO:0016021	integral component of membrane [GO:0016021]	NULL	NULL	1 out of 5	NULL	KID62040;	NULL
43.3018	KID69112.1	356	hypothetical protein MAN_01626, partial	MAN_01626	A0A0B4FMV0	A0A0B4FMV0_METAN	unreviewed	Uncharacterized protein (Fragment)	Metarhizium anisopliae ARSEF 549	356	GO:0016021	integral component of membrane [GO:0016021]	NULL	NULL	1 out of 5	NULL	KID69112;	NULL
6249.9	KID60803.1	122	hypothetical protein MAN_09531, partial	MAN_09531	A0A0B4ERH2	A0A0B4ERH2_METAN	unreviewed	Uncharacterized protein (Fragment)	Metarhizium anisopliae ARSEF 549	122	NULL	NULL	NULL	NULL	1 out of 5	NULL	KID60803;	NULL
1693.93	KID62586.1	503	choline transport protein, partial	MAN_07802	A0A0B4F9X7	A0A0B4F9X7_METAN	unreviewed	Choline transport protein (Fragment)	Metarhizium anisopliae ARSEF 549	503	GO:0015171; GO:0016021	integral component of membrane [GO:0016021]; amino acid transmembrane transporter activity [GO:0015171]	PF13520;	NULL	1 out of 5	NULL	KID62586;	K19564
18.5579	KID63744.1	317	hypothetical protein MAN_06915, partial	MAN_06915	A0A0B4G5Q9	A0A0B4G5Q9_METAN	unreviewed	Uncharacterized protein (Fragment)	Metarhizium anisopliae ARSEF 549	317	GO:0016021	integral component of membrane [GO:0016021]	NULL	NULL	1 out of 5	NULL	KID63744;	NULL
2748.64	KID69936.1	589	secreted aspartic proteinase, partial	MAN_02450	A0A0B4FW60	A0A0B4FW60_METAN	unreviewed	Secreted aspartic proteinase (Fragment)	Metarhizium anisopliae ARSEF 549	589	GO:0004190	aspartic-type endopeptidase activity [GO:0004190]	PF00026;	NULL	1 out of 5	NULL	KID69936;	NULL
1346.48	KID65369.1	346	hypothetical protein MAN_06380, partial	MAN_06380	A0A0B4GAL8	A0A0B4GAL8_METAN	unreviewed	Uncharacterized protein (Fragment)	Metarhizium anisopliae ARSEF 549	346	GO:0016021	integral component of membrane [GO:0016021]	NULL	NULL	1 out of 5	NULL	KID65369;	NULL
324.764	KID62927.1	199	hypothetical protein MAN_08143, partial	MAN_08143	A0A0B4F550	A0A0B4F550_METAN	unreviewed	Uncharacterized protein (Fragment)	Metarhizium anisopliae ARSEF 549	199	NULL	NULL	NULL	NULL	1 out of 5	NULL	KID62927;	NULL
5405.51	KID62030.1	1209	meiotically up-regulated protein, partial	MAN_08709	A0A0B4EIW5	A0A0B4EIW5_METAN	unreviewed	Meiotically up-regulated protein (Fragment)	Metarhizium anisopliae ARSEF 549	1209	GO:0016021	integral component of membrane [GO:0016021]	PF00168;	NULL	1 out of 5	NULL	KID62030;	NULL
492.816	KID59755.1	579	phosphotransferase family protein, partial	MAN_10396	A0A0B4EC14	A0A0B4EC14_METAN	unreviewed	Phosphotransferase family protein (Fragment)	Metarhizium anisopliae ARSEF 549	579	GO:0016740	transferase activity [GO:0016740]	PF01636;	NULL	1 out of 5	NULL	KID59755;	NULL
23.7129	KID60992.1	262	oxidoreductase, short-chain dehydrogenase/reductase family, partial	MAN_09276	A0A0B4EZ81	A0A0B4EZ81_METAN	unreviewed	Oxidoreductase, short-chain dehydrogenase/reductase family (Fragment)	Metarhizium anisopliae ARSEF 549	262	NULL	NULL	NULL	NULL	1 out of 5	NULL	KID60992;	NULL
1159.87	KID61820.1	288	hypothetical protein MAN_08499, partial	MAN_08499	A0A0B4EI68	A0A0B4EI68_METAN	unreviewed	Uncharacterized protein (Fragment)	Metarhizium anisopliae ARSEF 549	288	GO:0016021	integral component of membrane [GO:0016021]	NULL	NULL	1 out of 5	NULL	KID61820;	NULL
19.5889	KID69078.1	199	hypothetical protein MAN_01592, partial	MAN_01592	A0A0B4FF70	A0A0B4FF70_METAN	unreviewed	Uncharacterized protein (Fragment)	Metarhizium anisopliae ARSEF 549	199	NULL	NULL	NULL	NULL	1 out of 5	NULL	KID69078;	NULL
681.488	KID69558.1	411	O-methyltransferase, partial	MAN_02072	A0A0B4FGJ0	A0A0B4FGJ0_METAN	unreviewed	O-methyltransferase (Fragment)	Metarhizium anisopliae ARSEF 549	411	GO:0008171	O-methyltransferase activity [GO:0008171]	PF00891;	NULL	1 out of 5	NULL	KID69558;	NULL
9.27896	KID69324.1	308	hypothetical protein MAN_01838, partial	MAN_01838	A0A0B4GM56	A0A0B4GM56_METAN	unreviewed	Uncharacterized protein (Fragment)	Metarhizium anisopliae ARSEF 549	308	NULL	NULL	NULL	NULL	1 out of 5	NULL	KID69324;	NULL
7859.28	KID66057.1	239	hypothetical protein MAN_05716, partial	MAN_05716	A0A0B4FDX2	A0A0B4FDX2_METAN	unreviewed	Uncharacterized protein (Fragment)	Metarhizium anisopliae ARSEF 549	239	NULL	NULL	NULL	NULL	1 out of 5	NULL	KID66057;	NULL
131.967	KID60978.1	1578	Pfs, NACHT and WD domain protein, partial	MAN_09262	A0A0B4ES48	A0A0B4ES48_METAN	unreviewed	Pfs, NACHT and WD domain protein (Fragment)	Metarhizium anisopliae ARSEF 549	1578	NULL	NULL	PF17100;PF00400;	NULL	1 out of 5	NULL	KID60978;	NULL
12583.3	KID62778.1	624	sialidase, partial	MAN_07994	A0A0B4EXF9	A0A0B4EXF9_METAN	unreviewed	Sialidase (Fragment)	Metarhizium anisopliae ARSEF 549	624	NULL	NULL	NULL	NULL	1 out of 5	NULL	KID62778;	NULL
644.373	KID68034.1	99	hypothetical protein MAN_02890, partial	MAN_02890	A0A0B4GIA3	A0A0B4GIA3_METAN	unreviewed	Uncharacterized protein (Fragment)	Metarhizium anisopliae ARSEF 549	99	NULL	NULL	NULL	NULL	1 out of 5	NULL	KID68034;	NULL
961.919	KID68099.1	523	Major facilitator superfamily domain, general substrate transporter, partial	MAN_02955	A0A0B4GIF2	A0A0B4GIF2_METAN	unreviewed	Major facilitator superfamily domain, general substrate transporter (Fragment)	Metarhizium anisopliae ARSEF 549	523	GO:0016021; GO:0055085	integral component of membrane [GO:0016021]; transmembrane transport [GO:0055085]	PF07690;	NULL	1 out of 5	NULL	KID68099;	NULL
